# Supplementary material for: Prevalence and type distribution of human papillomavirus in a Chinese urban population between 2014 and 2018: a retrospective study
Source: PeerJ. 2020 Mar 23;8:e8709. doi: 10.7717/peerj.8709 (PMC7098390; doi:10.7717/peerj.8709)
Supplement: Table S3 [file peerj-08-8709-s007.xlsx]

## Sheet: Sheet1
id	no1	date1	HPVmethod1	hpv1	HPV061	HPV111	HPV161	HPV181	HPV261	HPV311	HPV331	HPV351	HPV391	HPV451	HPV511	HPV521	HPV531	HPV561	HPV581	HPV591	HPV661	HPV681	HPV731	HPV811	HPV821	age1	use1	no2	date2	HPVmethod2	hpv2	HPV062	HPV112	HPV162	HPV182	HPV262	HPV312	HPV332	HPV352	HPV392	HPV452	HPV512	HPV522	HPV532	HPV562	HPV582	HPV592	HPV662	HPV682
1	15060300066																									32		16061200123	2016-06-12 14:40:41	3	0	0	0	0	0		0	0	0	0	0	0	0		0	0	0		0
2	15060300072																									36		16061200129	2016-06-12 14:40:41	3	0	0	0	0	0		0	0	0	0	0	0	0		0	0	0		0
3	15060300076																									46		16061200133	2016-06-12 14:40:41	3	0	0	0	0	0		0	0	0	0	0	0	0		0	0	0		0
4	15060300077																									48		16061200134	2016-06-12 14:40:41	3	0	0	0	0	0		0	0	0	0	0	0	0		0	0	0		0
5	15060300078																									47		16060801337	2016-06-08 14:57:09	3	0	0	0	0	0		0	0	0	0	0	0	0		0	0	0		0
6	15060300079																									45		16061200135	2016-06-12 14:40:41	3	0	0	0	0	0		0	0	0	0	0	0	0		0	0	0		0
7	15060300080																									51		16061200136	2016-06-12 14:40:41	3	0	0	0	0	0		0	0	0	0	0	0	0		0	0	0		0
8	15060300081																									49		16061200137	2016-06-12 14:40:41	2	1	0	0	0	0	0	0	0	0	0	0	0	1	0	0	0	0	0	0
9	15060300083																									35		16061200139	2016-06-12 14:40:41	2	1	1	0	0	0	0	0	0	0	0	0	0	0	0	0	0	0	0	0
10	15060300084																									57		16061200140	2016-06-12 14:40:41	3	0	0	0	0	0		0	0	0	0	0	0	0		0	0	0		0
11	15060300088																									40		16061200144	2016-06-12 14:40:42	3	0	0	0	0	0		0	0	0	0	0	0	0		0	0	0		0
12	15060300100																									50		16061200155	2016-06-12 14:40:42	3	0	0	0	0	0		0	0	0	0	0	0	0		0	0	0		0
13	15060300103																									40		16061200158	2016-06-12 14:40:42	3	0	0	0	0	0		0	0	0	0	0	0	0		0	0	0		0
14	15060300104																									52		16061200159	2016-06-12 14:40:42	3	0	0	0	0	0		0	0	0	0	0	0	0		0	0	0		0
15	14123001889	2014-12-30 09:35:28	3	0	0	0	0	0		0	0	0	0	0	0	0		0	0	0		0				61	1	15123100230	2015-12-31 14:16:22	2	1	0	0	0	0	0	0	0	0	0	0	1	0	0	0	0	0	0	1
16	15011900050	2015-01-19 12:07:27	3	0	0	0	0	0		0	0	0	0	0	0	0		0	0	0		0				32	1	16010401304	2016-01-04 10:35:45	3	0	0	0	0	0		0	0	0	0	0	0	0		0	0	0		0
17	14123001281	2014-12-30 09:34:44	3	0	0	0	0	0		0	0	0	0	0	0	0		0	0	0		0				32	1	16010401385	2016-01-04 10:35:49	3	0	0	0	0	0		0	0	0	0	0	0	0		0	0	0		0
18	14123001146	2014-12-30 09:34:35	2	1	0	0	0	0	0	0	0	0	0	0	0	1	0	0	0	0	0	0	0	0	0	29	1	16010401193	2016-01-04 10:35:41	3	0	0	0	0	0		0	0	0	0	0	0	0		0	0	0		0
19	15011200047	2015-01-12 10:53:16	3	0	0	0	0	0		0	0	0	0	0	0	0		0	0	0		0				59	1
20	18010300948	2018-01-03 10:25:22	1	0	0	0	0	0	0	0	0	0	0	0	0	0	0	0	0	0	0	0	0	0	0	53	1
21	14123001292	2014-12-30 09:34:45	3	0	0	0	0	0		0	0	0	0	0	0	0		0	0	0		0				34	1	16010401398	2016-01-04 10:35:50	3	0	0	0	0	0		0	0	0	0	0	0	0		0	0	0		0
22	14123001297	2014-12-30 09:34:45	2	1	0	0	0	0	0	0	0	0	1	0	0	0	0	0	0	0	0	0	0	0	0	34	1
23	16010401403	2016-01-04 10:35:50	3	0	0	0	0	0		0	0	0	0	0	0	0		0	0	0		0				34	1	16122901611	2016-12-29 13:46:24	1	0	0	0	0	0	0	0	0	0	0	0	0	0	0	0	0	0	0	0
24	15042900565	2015-04-29 15:47:55	3	0	0	0	0	0		0	0	0	0	0	0	0		0	0	0		0				64	1	16051000610	2016-05-10 15:08:25	3	0	0	0	0	0		0	0	0	0	0	0	0		0	0	0		0
25	15040100111																									37		16032400105	2016-03-24 14:28:36	3	0	0	0	0	0		0	0	0	0	0	0	0		0	0	0		0
26	15040100114																									37		17022600036	2017-02-26 19:10:17	1	0	0	0	0	0	0	0	0	0	0	0	0	0	0	0	0	0	0	0
27	15040100104																									32		16032400065	2016-03-24 14:28:34	3	0	0	0	0	0		0	0	0	0	0	0	0		0	0	0		0
28	15060100698																									56		16060800834	2016-06-08 14:56:47	3	0	0	0	0	0		0	0	0	0	0	0	0		0	0	0		0
29	14060200321																									57		15060100214
30	15060100778																									34		16060800914
31	15060100612																									49		16060800748	2016-06-08 14:56:44	3	0	0	0	0	0		0	0	0	0	0	0	0		0	0	0		0
32	15060100540																									42		16060800670	2016-06-08 14:56:41	3	0	0	0	0	0		0	0	0	0	0	0	0		0	0	0		0
33	15060100754																									56		16060800890	2016-06-08 14:56:50	3	0	0	0	0	0		0	0	0	0	0	0	0		0	0	0		0
34	14060200371																									45		15060100986
35	15060100555																									43		16060800685	2016-06-08 14:56:41	3	0	0	0	0	0		0	0	0	0	0	0	0		0	0	0		0
36	14060200385																									41		15060100669
37	16060800745	2016-06-08 14:56:44	3	0	0	0	0	0		0	0	0	0	0	0	0		0	0	0		0				40	1	17060200848	2017-06-02 17:00:11	1	0	0	0	0	0	0	0	0	0	0	0	0	0	0	0	0	0	0	0
38	14060200388																									41		15060100652
39	15061500002																									54		16060800303	2016-06-08 14:56:24	3	0	0	0	0	0		0	0	0	0	0	0	0		0	0	0		0
40	14060200400																									41		15060101082
41	15060100648																									40		16060800782	2016-06-08 14:56:45	3	0	0	0	0	0		0	0	0	0	0	0	0		0	0	0		0
42	14060200404																									35		15060100110
43	15060100162																									45		16060800190	2016-06-08 14:56:18	3	0	0	0	0	0		0	0	0	0	0	0	0		0	0	0		0
44	14060200419																									51		15060100366
45	14060200420																									38		15060101133
46	15060101162																									53		16060800376	2016-06-08 14:56:27	2	1	0	0	0	0	0	0	0	0	0	0	0	0	0	0	0	0	0	1
47	15060100226																									42		16060800348	2016-06-08 14:56:26	3	0	0	0	0	0		0	0	0	0	0	0	0		0	0	0		0
48	15060100247																									42		16060800388	2016-06-08 14:56:28	3	0	0	0	0	0		0	0	0	0	0	0	0		0	0	0		0
49	15060100530																									41		16060800661	2016-06-08 14:56:40	3	0	0	0	0	0		0	0	0	0	0	0	0		0	0	0		0
50	15060100739																									57		16060800875	2016-06-08 14:56:49	3	0	0	0	0	0		0	0	0	0	0	0	0		0	0	0		0
51	14060200448																									47		15060100860
52	14060200470																									38		16060801329	2016-06-08 14:57:09	3	0	0	0	0	0		0	0	0	0	0	0	0		0	0	0		0
53	14060200472																									51		16061300001	2016-06-13 07:29:24	3	0	0	0	0	0		0	0	0	0	0	0	0		0	0	0		0
54	17060200163	2017-06-02 16:59:41	1	0	0	0	0	0	0	0	0	0	0	0	0	0	0	0	0	0	0	0	0	0	0	36	1	18052500095	2018-05-25 10:41:29	1	0	0	0	0	0	0	0	0	0	0	0	0	0	0	0	0	0	0	0
55	14060200474																									50		15061500016
56	16060801316	2016-06-08 14:57:09	3	0	0	0	0	0		0	0	0	0	0	0	0		0	0	0		0				35	1	17060200164	2017-06-02 16:59:41	1	0	0	0	0	0	0	0	0	0	0	0	0	0	0	0	0	0	0	0
57	14060200481																									46		16060801320	2016-06-08 14:57:09	3	0	0	0	0	0		0	0	0	0	0	0	0		0	0	0		0
58	14060200485																									49		16060801327	2016-06-08 14:57:09	3	0	0	0	0	0		0	0	0	0	0	0	0		0	0	0		0
59	15042900403	2015-04-29 15:47:47	3	0	0	0	0	0		0	0	0	0	0	0	0		0	0	0		0				36	1	16051000269	2016-05-10 15:08:10	3	0	0	0	0	0		0	0	0	0	0	0	0		0	0	0		0
60	15060100643																									38		16060800778	2016-06-08 14:56:45	3	0	0	0	0	0		0	0	0	0	0	0	0		0	0	0		0
61	15060100506																									31		16060800635	2016-06-08 14:56:39	3	0	0	0	0	0		0	0	0	0	0	0	0		0	0	0		0
62	15060100331																									48		16060800468	2016-06-08 14:56:31	3	0	0	0	0	0		0	0	0	0	0	0	0		0	0	0		0
63	15060100493																									39		16060800622	2016-06-08 14:56:38	3	0	0	0	0	0		0	0	0	0	0	0	0		0	0	0		0
64	15060101155																									54		16060800369	2016-06-08 14:56:27	3	0	0	0	0	0		0	0	0	0	0	0	0		0	0	0		0
65	14060200520																									39		15060100575
66	14060200521																									29		15060100894
67	14060200531																									54		15060100173
68	14060200532																									38		15060100129
69	15060100289																									38		16060800428	2016-06-08 14:56:30	3	0	0	0	0	0		0	0	0	0	0	0	0		0	0	0		0
70	15060100489																									42		16060800618	2016-06-08 14:56:38	2	1	0	0	0	0	0	0	1	0	0	0	0	0	0	0	0	0	0	0
71	15060100485																									56		16060800614	2016-06-08 14:56:38	3	0	0	0	0	0		0	0	0	0	0	0	0		0	0	0		0
72	15060101159																									30		17060201469	2017-06-02 17:00:40	1	0	0	0	0	0	0	0	0	0	0	0	0	0	0	0	0	0	0	0
73	15060101053																									54		16060801217	2016-06-08 14:57:04	3	0	0	0	0	0		0	0	0	0	0	0	0		0	0	0		0
74	14060200559																									33		15060100316
75	15060101185																									46		16060801154	2016-06-08 14:57:01	3	0	0	0	0	0		0	0	0	0	0	0	0		0	0	0		0
76	15061500010																									41		16060800349	2016-06-08 14:56:26	3	0	0	0	0	0		0	0	0	0	0	0	0		0	0	0		0
77	15060100835																									34		16060800977	2016-06-08 14:56:54	3	0	0	0	0	0		0	0	0	0	0	0	0		0	0	0		0
78	15060100261																									37		16060800401	2016-06-08 14:56:28	3	0	0	0	0	0		0	0	0	0	0	0	0		0	0	0		0
79	15060101130																									40		17060201403	2017-06-02 17:00:36	1	0	0	0	0	0	0	0	0	0	0	0	0	0	0	0	0	0	0	0
80	15060100309																									37		16060800448	2016-06-08 14:56:30	3	0	0	0	0	0		0	0	0	0	0	0	0		0	0	0		0
81	15060100584																									32		16060800711	2016-06-08 14:56:42	3	0	0	0	0	0		0	0	0	0	0	0	0		0	0	0		0
82	14060200590																									37		15060101081
83	15060100536																									31		16060800666	2016-06-08 14:56:40	3	0	0	0	0	0		0	0	0	0	0	0	0		0	0	0		0
84	15060101150																									32		16060800364	2016-06-08 14:56:27	3	0	0	0	0	0		0	0	0	0	0	0	0		0	0	0		0
85	15060100562																									35		16060800692	2016-06-08 14:56:42	3	0	0	0	0	0		0	0	0	0	0	0	0		0	0	0		0
86	15060100740																									33		16060800876	2016-06-08 14:56:49	3	0	0	0	0	0		0	0	0	0	0	0	0		0	0	0		0
87	15060100660																									30		16060800794	2016-06-08 14:56:46	3	0	0	0	0	0		0	0	0	0	0	0	0		0	0	0		0
88	14060200616																									48		15060100675
89	15060100803																									41		16060800939	2016-06-08 14:56:52	3	0	0	0	0	0		0	0	0	0	0	0	0		0	0	0		0
90	15060100836																									38		16060800978	2016-06-08 14:56:54	3	0	0	0	0	0		0	0	0	0	0	0	0		0	0	0		0
91	14060200634																									45		15060100767
92	15060100444																									46		16060800569	2016-06-08 14:56:36	3	0	0	0	0	0		0	0	0	0	0	0	0		0	0	0		0
93	15060100787																									53		16060800923	2016-06-08 14:56:51	3	0	0	0	0	0		0	0	0	0	0	0	0		0	0	0		0
94	15060100397																									39		16060800526	2016-06-08 14:56:34	3	0	0	0	0	0		0	0	0	0	0	0	0		0	0	0		0
95	15060100465																									49		16060800585	2016-06-08 14:56:36	3	0	0	0	0	0		0	0	0	0	0	0	0		0	0	0		0
96	14060200643																									48		15060100810
97	14060200646																									38		15060100805
98	15060100388																									37		16060800518	2016-06-08 14:56:33	3	0	0	0	0	0		0	0	0	0	0	0	0		0	0	0		0
99	15060100386																									56		16060800516	2016-06-08 14:56:33	3	0	0	0	0	0		0	0	0	0	0	0	0		0	0	0		0
100	15060100137																									33		16060800268	2016-06-08 14:56:23	3	0	0	0	0	0		0	0	0	0	0	0	0		0	0	0		0
101	14060200662																									53		15060100389
102	14060200664																									41		15060101105
103	14060200675																									55		15060100120
104	15060100344																									49		16060800481	2016-06-08 14:56:32	3	0	0	0	0	0		0	0	0	0	0	0	0		0	0	0		0
105	15060100708																									57		16053001148
106	15060100155																									55		16060800186	2016-06-08 14:56:18	3	0	0	0	0	0		0	0	0	0	0	0	0		0	0	0		0
107	14060200686																									35		15060100125
108	14060200688																									55		15060100056
109	15060100140																									46		16060800271	2016-06-08 14:56:23	3	0	0	0	0	0		0	0	0	0	0	0	0		0	0	0		0
110	15060100160																									54		16060800188	2016-06-08 14:56:18	3	0	0	0	0	0		0	0	0	0	0	0	0		0	0	0		0
111	14060200697																									53		15060100989
112	15060100678																									57		16060800811	2016-06-08 14:56:46	3	0	0	0	0	0		0	0	0	0	0	0	0		0	0	0		0
113	15060100522																									41		16060800651
114	15060100750																									50		16060800886	2016-06-08 14:56:50	2	1	0	0	0	0	0	0	0	0	0	0	0	0	0	0	1	0	0	0
115	15060101009																									36		16060801174	2016-06-08 14:57:02	3	0	0	0	0	0		0	0	0	0	0	0	0		0	0	0		0
116	14060200712																									40		15060100253
117	15060100641																									42		16060800776	2016-06-08 14:56:45	3	0	0	0	0	0		0	0	0	0	0	0	0		0	0	0		0
118	15060100683																									35		16060800816	2016-06-08 14:56:47	3	0	0	0	0	0		0	0	0	0	0	0	0		0	0	0		0
119	15060100610																									47		16060800746	2016-06-08 14:56:44	3	0	0	0	0	0		0	0	0	0	0	0	0		0	0	0		0
120	15060100481																									57		16060800610	2016-06-08 14:56:37	3	0	0	0	0	0		0	0	0	0	0	0	0		0	0	0		0
121	14060200731																									56		15060101018
122	14060200733																									31		15060100932
123	15060100270																									37		16060800410	2016-06-08 14:56:29	3	0	0	0	0	0		0	0	0	0	0	0	0		0	0	0		0
124	15060100855																									34		16060800995	2016-06-08 14:56:55	3	0	0	0	0	0		0	0	0	0	0	0	0		0	0	0		0
125	14060200738																									32		15060100325
126	15060100045																									32		16060800164	2016-06-08 14:56:17	3	0	0	0	0	0		0	0	0	0	0	0	0		0	0	0		0
127	14060200751																									29		16060801149	2016-06-08 14:57:01	3	0	0	0	0	0		0	0	0	0	0	0	0		0	0	0		0
128	14060200753																									39		15060101046
129	15060100537																									39		17060200778	2017-06-02 17:00:09	1	0	0	0	0	0	0	0	0	0	0	0	0	0	0	0	0	0	0	0
130	14060200757																									30		15060100729
131	15060100574																									42		16060800702	2016-06-08 14:56:42	3	0	0	0	0	0		0	0	0	0	0	0	0		0	0	0		0
132	15060300061																									41		16061200118	2016-06-12 14:40:40	2	1	0	0	0	0	0	0	0	0	0	0	0	0	0	0	1	0	0	0
133	15060100553																									39		16060800683	2016-06-08 14:56:41	3	0	0	0	0	0		0	0	0	0	0	0	0		0	0	0		0
134	15060100741																									44		16060800877	2016-06-08 14:56:49	3	0	0	0	0	0		0	0	0	0	0	0	0		0	0	0		0
135	15060101080																									42		16060801242	2016-06-08 14:57:05	2	1	0	0	0	0	0	0	0	0	0	0	0	0	0	0	1	0	0	0
136	15060100714																									49		16060800850	2016-06-08 14:56:48	3	0	0	0	0	0		0	0	0	0	0	0	0		0	0	0		0
137	14060200789																									39		15060100875
138	15060100830																									36		16060800972	2016-06-08 14:56:54	3	0	0	0	0	0		0	0	0	0	0	0	0		0	0	0		0
139	15060100231																									53		16062000012	2016-06-20 07:54:31	3	0	0	0	0	0		0	0	0	0	0	0	0		0	0	0		0
140	14060200806																									42		15060100991
141	14060200807																									41		15060100869
142	15060300108																									42		16060801030	2016-06-08 14:56:56	2	1	0	0	0	1	0	0	0	0	0	0	0	0	0	0	0	0	0	0
143	15060100858																									42		16060800998	2016-06-08 14:56:55	3	0	0	0	0	0		0	0	0	0	0	0	0		0	0	0		0
144	15060101107																									35		16060801271	2016-06-08 14:57:07	3	0	0	0	0	0		0	0	0	0	0	0	0		0	0	0		0
145	14060200818																									29		16060801053	2016-06-08 14:56:57	3	0	0	0	0	0		0	0	0	0	0	0	0		0	0	0		0
146	15060100668																									32		16060800802	2016-06-08 14:56:46	3	0	0	0	0	0		0	0	0	0	0	0	0		0	0	0		0
147	15060100132																									34		16060800264	2016-06-08 14:56:22	2	1	0	0	0	0	0	0	0	0	0	0	0	1	0	0	0	0	0	0
148	14060200837																									52		15060100153
149	15060100620																									39		16060800756	2016-06-08 14:56:44	3	0	0	0	0	0		0	0	0	0	0	0	0		0	0	0		0
150	15060100152																									50		16060800283	2016-06-08 14:56:23	3	0	0	0	0	0		0	0	0	0	0	0	0		0	0	0		0
151	15060100211																									57		16060800332	2016-06-08 14:56:25	2	1	0	0	0	1	0	0	0	0	0	0	0	0	0	0	0	0	0	0
152	14060200859																									37		15060101120
153	15060100644																									47		16060800779	2016-06-08 14:56:45	3	0	0	0	0	0		0	0	0	0	0	0	0		0	0	0		0
154	14060200873																									35		15060100602
155	15060100679																									43		16060800812	2016-06-08 14:56:46	3	0	0	0	0	0		0	0	0	0	0	0	0		0	0	0		0
156	14060200876																									32		15060100071
157	14060200881																									31		15060100704
158	16060800212	2016-06-08 14:56:19	3	0	0	0	0	0		0	0	0	0	0	0	0		0	0	0		0				32	1	18052500124	2018-05-25 10:41:31	1	0	0	0	0	0	0	0	0	0	0	0	0	0	0	0	0	0	0	0
159	15060100755																									32		16060800891	2016-06-08 14:56:50	3	0	0	0	0	0		0	0	0	0	0	0	0		0	0	0		0
160	15060100654																									47		16060800788	2016-06-08 14:56:45	3	0	0	0	0	0		0	0	0	0	0	0	0		0	0	0		0
161	14060200890																									30		15060100890
162	15060100352																									48		16060800489	2016-06-08 14:56:32	3	0	0	0	0	0		0	0	0	0	0	0	0		0	0	0		0
163	15060100114																									44		16060800251	2016-06-08 14:56:21	3	0	0	0	0	0		0	0	0	0	0	0	0		0	0	0		0
164	15060100672																									41		16060800806	2016-06-08 14:56:46	3	0	0	0	0	0		0	0	0	0	0	0	0		0	0	0		0
165	16060800365	2016-06-08 14:56:27	3	0	0	0	0	0		0	0	0	0	0	0	0		0	0	0		0				34	1	17060201460	2017-06-02 17:00:39	1	0	0	0	0	0	0	0	0	0	0	0	0	0	0	0	0	0	0	0
166	15060100773																									52		16060800910	2016-06-08 14:56:51	2	1	0	0	0	0	0	0	0	0	0	0	1	0	0	0	0	0	0	0
167	15060100651																									52		16060800785	2016-06-08 14:56:45	3	0	0	0	0	0		0	0	0	0	0	0	0		0	0	0		0
168	15060100840																									36		16060800982	2016-06-08 14:56:54	3	0	0	0	0	0		0	0	0	0	0	0	0		0	0	0		0
169	15061500003																									46		16060800335	2016-06-08 14:56:26	3	0	0	0	0	0		0	0	0	0	0	0	0		0	0	0		0
170	15060100346																									39		16060800483	2016-06-08 14:56:32	3	0	0	0	0	0		0	0	0	0	0	0	0		0	0	0		0
171	15060100772																									45		16060800909	2016-06-08 14:56:51	3	0	0	0	0	0		0	0	0	0	0	0	0		0	0	0		0
172	15060101148																									52		16060800362	2016-06-08 14:56:27	3	0	0	0	0	0		0	0	0	0	0	0	0		0	0	0		0
173	14060200965																									37		15060100239
174	15060100826																									47		17060201085	2017-06-02 17:00:21	1	0	0	0	0	0	0	0	0	0	0	0	0	0	0	0	0	0	0	0
175	14060200971																									57		15090900070	2015-09-09 08:32:10	3	0	0	0	0	0		0	0	0	0	0	0	0		0	0	0		0
176	15060100414																									50		17060200648	2017-06-02 17:00:03	1	0	0	0	0	0	0	0	0	0	0	0	0	0	0	0	0	0	0	0
177	15060100848																									40		16060800989	2016-06-08 14:56:54	3	0	0	0	0	0		0	0	0	0	0	0	0		0	0	0		0
178	14060200974																									45		15060100164
179	15060100806																									45		16060800942	2016-06-08 14:56:52	3	0	0	0	0	0		0	0	0	0	0	0	0		0	0	0		0
180	15060100393																									37		16060800523
181	15060100149																									44		16060800280	2016-06-08 14:56:23	3	0	0	0	0	0		0	0	0	0	0	0	0		0	0	0		0
182	14060201014																									52		16060800288	2016-06-08 14:56:24	3	0	0	0	0	0		0	0	0	0	0	0	0		0	0	0		0
183	15060100577																									41		16060800705	2016-06-08 14:56:42	3	0	0	0	0	0		0	0	0	0	0	0	0		0	0	0		0
184	15060100443																									40		16060800568	2016-06-08 14:56:36	3	0	0	0	0	0		0	0	0	0	0	0	0		0	0	0		0
185	15060101049																									36		16060801213	2016-06-08 14:57:04	3	0	0	0	0	0		0	0	0	0	0	0	0		0	0	0		0
186	15060100435																									39		17060200674	2017-06-02 17:00:04	1	0	0	0	0	0	0	0	0	0	0	0	0	0	0	0	0	0	0	0
187	15060100174																									41		16060800293	2016-06-08 14:56:24	3	0	0	0	0	0		0	0	0	0	0	0	0		0	0	0		0
188	14060201029																									37		15060100175
189	15060101182																									55		16060801151	2016-06-08 14:57:01	3	0	0	0	0	0		0	0	0	0	0	0	0		0	0	0		0
190	15060101179																									35		16060801148	2016-06-08 14:57:01	3	0	0	0	0	0		0	0	0	0	0	0	0		0	0	0		0
191	14060201055																									40		15060101164	2015-06-01 10:21:58	3	0	0	0	0	0		0	0	0	0	0	0	0		0	0	0		0
192	15060100699																									36		17060200940	2017-06-02 17:00:15	1	0	0	0	0	0	0	0	0	0	0	0	0	0	0	0	0	0	0	0
193	15060100791																									49		16060800927	2016-06-08 14:56:51	3	0	0	0	0	0		0	0	0	0	0	0	0		0	0	0		0
194	14060201071																									56		15060100959
195	15060101008																									36		16060801173	2016-06-08 14:57:02	3	0	0	0	0	0		0	0	0	0	0	0	0		0	0	0		0
196	14060201074																									44		15060101161
197	15060100468																									38		16060800588	2016-06-08 14:56:36	2	1	0	0	0	0	0	0	0	0	0	0	0	0	0	1	0	0	0	0
198	15060100085																									40		16060800233	2016-06-08 14:56:20	3	0	0	0	0	0		0	0	0	0	0	0	0		0	0	0		0
199	14060201093																									55		15060101071
200	14060201097																									48		15061100052
201	14060201124																									50		15060100354
202	14060201126																									41		15060100300
203	15060101172																									41		16060801140	2016-06-08 14:57:01	3	0	0	0	0	0		0	0	0	0	0	0	0		0	0	0		0
204	15060100935																									56		16060801075	2016-06-08 14:56:58	3	0	0	0	0	0		0	0	0	0	0	0	0		0	0	0		0
205	14060201143																									42		15060101168
206	15060100824																									35		16060800967	2016-06-08 14:56:53	3	0	0	0	0	0		0	0	0	0	0	0	0		0	0	0		0
207	15060100158																									29		16060800194	2016-06-08 14:56:18	3	0	0	0	0	0		0	0	0	0	0	0	0		0	0	0		0
208	15060100328																									44		16060800465	2016-06-08 14:56:31	3	0	0	0	0	0		0	0	0	0	0	0	0		0	0	0		0
209	15060100324																									32		16060800461	2016-06-08 14:56:31	2	1	0	0	0	0	0	0	0	0	0	0	0	0	0	0	0	0	0	1
210	14060201162																									33		15060101174
211	15060300055																									35		16061200112	2016-06-12 14:40:40	3	0	0	0	0	0		0	0	0	0	0	0	0		0	0	0		0
212	15060100962																									34		16060801101	2016-06-08 14:56:59	3	0	0	0	0	0		0	0	0	0	0	0	0		0	0	0		0
213	14060201173																									45		15060100222
214	15060100193																									46		16060800314	2016-06-08 14:56:25	3	0	0	0	0	0		0	0	0	0	0	0	0		0	0	0		0
215	15042900406	2015-04-29 15:47:47	3	0	0	0	0	0		0	0	0	0	0	0	0		0	0	0		0				33	1	16051000395	2016-05-10 15:08:15	3	0	0	0	0	0		0	0	0	0	0	0	0		0	0	0		0
216	14060201178																									31		15060100255
217	14060201179																									34		15060100282
218	15060100326																									39		15070800045
219	15060300070																									46		16061200126	2016-06-12 14:40:41	3	0	0	0	0	0		0	0	0	0	0	0	0		0	0	0		0
220	15060100070																									34		16060800208	2016-06-08 14:56:19	3	0	0	0	0	0		0	0	0	0	0	0	0		0	0	0		0
221	15060100677																									56		16060800810	2016-06-08 14:56:46	3	0	0	0	0	0		0	0	0	0	0	0	0		0	0	0		0
222	14060201200																									41		15060100816
223	15060100124																									45		16060800259	2016-06-08 14:56:22	2	1	0	0	0	0	0	0	0	0	0	0	0	0	0	0	1	0	0	0
224	14060201207																									32		15060100765
225	15060100351																									36		16060800488	2016-06-08 14:56:32	3	0	0	0	0	0		0	0	0	0	0	0	0		0	0	0		0
226	14060201214																									32		15060100303
227	15060101154																									38		16060800368	2016-06-08 14:56:27	3	0	0	0	0	0		0	0	0	0	0	0	0		0	0	0		0
228	14060201226																									51		15060100156
229	15060100392																									32		16060800522	2016-06-08 14:56:34	3	0	0	0	0	0		0	0	0	0	0	0	0		0	0	0		0
230	15060100541																									34		17060200782	2017-06-02 17:00:09	1	0	0	0	0	0	0	0	0	0	0	0	0	0	0	0	0	0	0	0
231	14060201243																									32		15060100692
232	14060201245																									37		16060800743	2016-06-08 14:56:44	3	0	0	0	0	0		0	0	0	0	0	0	0		0	0	0		0
233	15060100283																									33		16060800422	2016-06-08 14:56:29	3	0	0	0	0	0		0	0	0	0	0	0	0		0	0	0		0
234	15060100843																									56		16061600058
235	15060100851																									32		16060800992	2016-06-08 14:56:54	3	0	0	0	0	0		0	0	0	0	0	0	0		0	0	0		0
236	14060201273																									41		15060101078
237	15060101113																									31		16060800221	2016-06-08 14:56:20	3	0	0	0	0	0		0	0	0	0	0	0	0		0	0	0		0
238	14060201292																									34		15060101014
239	14060201301																									31		15060100094
240	15060100453																									34		16060800576
241	15060100863																									37		16060801007	2016-06-08 14:56:55	3	0	0	0	0	0		0	0	0	0	0	0	0		0	0	0		0
242	15060100707																									53		16060800843	2016-06-08 14:56:48	3	0	0	0	0	0		0	0	0	0	0	0	0		0	0	0		0
243	15060100795																									37		16060800931	2016-06-08 14:56:52	3	0	0	0	0	0		0	0	0	0	0	0	0		0	0	0		0
244	15060100246																									34		16060800387	2016-06-08 14:56:28	3	0	0	0	0	0		0	0	0	0	0	0	0		0	0	0		0
245	15060100357																									30		16060800160	2016-06-08 14:56:17	3	0	0	0	0	0		0	0	0	0	0	0	0		0	0	0		0
246	15060100350																									35		16060800487	2016-06-08 14:56:32	3	0	0	0	0	0		0	0	0	0	0	0	0		0	0	0		0
247	16060800408	2016-06-08 14:56:29	3	0	0	0	0	0		0	0	0	0	0	0	0		0	0	0		0				33	1	17060200499	2017-06-02 16:59:56	1	0	0	0	0	0	0	0	0	0	0	0	0	0	0	0	0	0	0	0
248	16060800714	2016-06-08 14:56:42	3	0	0	0	0	0		0	0	0	0	0	0	0		0	0	0		0				29	1	17060200828	2017-06-02 17:00:10	1	0	0	0	0	0	0	0	0	0	0	0	0	0	0	0	0	0	0	0
249	14060201324																									39		15060100138
250	14060201326																									39		15060101042
251	14060201331																									42		15060100136
252	14060201332																									27		15060300110
253	14060201333																									56		15060101002
254	15060100119																									51		16060800254	2016-06-08 14:56:21	3	0	0	0	0	0		0	0	0	0	0	0	0		0	0	0		0
255	14060201337																									60		15060101039
256	15060300064																									30		17060201535	2017-06-02 17:00:43	1	0	0	0	0	0	0	0	0	0	0	0	0	0	0	0	0	0	0	0
257	15060300114																									36		16061200171	2016-06-12 14:40:43	3	0	0	0	0	0		0	0	0	0	0	0	0		0	0	0		0
258	14060201342																									28		15060100896
259	14060201344																									38		15060100995
260	15060101072																									42		16060801235	2016-06-08 14:57:05	3	0	0	0	0	0		0	0	0	0	0	0	0		0	0	0		0
261	15060100994																									41		16060801159	2016-06-08 14:57:02	3	0	0	0	0	0		0	0	0	0	0	0	0		0	0	0		0
262	15060101059																									42		16060800381	2016-06-08 14:56:28	3	0	0	0	0	0		0	0	0	0	0	0	0		0	0	0		0
263	14060201362																									33		15060101065
264	15060101031																									33		16060801196	2016-06-08 14:57:03	3	0	0	0	0	0		0	0	0	0	0	0	0		0	0	0		0
265	14060201367																									40		15060101017
266	14060201370																									45		15060100998
267	14060201373																									49		15060100647
268	15060101144																									48		16060800358	2016-06-08 14:56:26	3	0	0	0	0	0		0	0	0	0	0	0	0		0	0	0		0
269	15060101166																									43		16060800379	2016-06-08 14:56:28	3	0	0	0	0	0		0	0	0	0	0	0	0		0	0	0		0
270	15060101143																									56		16060800357	2016-06-08 14:56:26	3	0	0	0	0	0		0	0	0	0	0	0	0		0	0	0		0
271	15060101109																									53		16060801273	2016-06-08 14:57:07	3	0	0	0	0	0		0	0	0	0	0	0	0		0	0	0		0
272	15060101153																									41		16060800367
273	15060101158																									47		16060800372	2016-06-08 14:56:27	3	0	0	0	0	0		0	0	0	0	0	0	0		0	0	0		0
274	15060100570																									35		16060800699	2016-06-08 14:56:42	3	0	0	0	0	0		0	0	0	0	0	0	0		0	0	0		0
275	15060100104																									39		16060800172	2016-06-08 14:56:17	3	0	0	0	0	0		0	0	0	0	0	0	0		0	0	0		0
276	15060101139																									51		16060800354	2016-06-08 14:56:26	3	0	0	0	0	0		0	0	0	0	0	0	0		0	0	0		0
277	14060201393																									35		17060201456	2017-06-02 17:00:39	1	0	0	0	0	0	0	0	0	0	0	0	0	0	0	0	0	0	0	0
278	15060100825																									29		16060800968	2016-06-08 14:56:53	3	0	0	0	0	0		0	0	0	0	0	0	0		0	0	0		0
279	14060201403																									44		15060100981
280	15060101110																									34		16060801274	2016-06-08 14:57:07	3	0	0	0	0	0		0	0	0	0	0	0	0		0	0	0		0
281	15060100161																									49		16060800196	2016-06-08 14:56:19	3	0	0	0	0	0		0	0	0	0	0	0	0		0	0	0		0
282	15060100364																									36		16060800497	2016-06-08 14:56:33	2	1	0	0	0	0	0	0	0	0	0	0	0	1	0	0	0	0	0	0
283	14060201410																									38		15060100168
284	15060101111																									42		16060801275	2016-06-08 14:57:07	3	0	0	0	0	0		0	0	0	0	0	0	0		0	0	0		0
285	14060201418																									44		15060100201
286	14060201419																									48		15060100868
287	15060100804																									36		16060800940
288	14060201423																									30		15060100515
289	14060201436																									52		15060100865
290	15060100720																									41		16060800856	2016-06-08 14:56:48	3	0	0	0	0	0		0	0	0	0	0	0	0		0	0	0		0
291	16060801256	2016-06-08 14:57:06	3	0	0	0	0	0		0	0	0	0	0	0	0		0	0	0		0				33	1	17060201347	2017-06-02 17:00:33	1	0	0	0	0	0	0	0	0	0	0	0	0	0	0	0	0	0	0	0
292	14060201445																									35		15060100828
293	14060201446																									36		15060101181
294	15060101094																									30		16060800181
295	14060201460																									30		15060101000
296	15060100170																									43		16060800189	2016-06-08 14:56:18	3	0	0	0	0	0		0	0	0	0	0	0	0		0	0	0		0
297	15060100614																									31		16060800750	2016-06-08 14:56:44	3	0	0	0	0	0		0	0	0	0	0	0	0		0	0	0		0
298	15060100733																									28		16052400040
299	15060100801																									38		16060800937	2016-06-08 14:56:52	3	0	0	0	0	0		0	0	0	0	0	0	0		0	0	0		0
300	14060201478																									36		15060100638
301	15060100777																									46		16060800913	2016-06-08 14:56:51	3	0	0	0	0	0		0	0	0	0	0	0	0		0	0	0		0
302	15060100374																									50		16060800505	2016-06-08 14:56:33	3	0	0	0	0	0		0	0	0	0	0	0	0		0	0	0		0
303	14060201486																									55		15061900081
304	14060201507																									49		15061200055
305	14060201515																									34		15061100006
306	14060201523																									40		15061600049
307	14060201532																									51		15061100007
308	14060201536																									30		15061100005
309	14060201541																									45		15072200024
310	14060201546																									38		17060200215	2017-06-02 16:59:43	1	0	0	0	0	0	0	0	0	0	0	0	0	0	0	0	0	0	0	0
311	14060201547																									41		15061200022
312	14060201549																									43		15070600028
313	15061500041																									38		16060801413	2016-06-08 14:57:13	2	1	0	0	0	0	0	0	0	0	0	0	1	0	0	0	0	0	0	0
314	14060201553																									36		16060801415	2016-06-08 14:57:13	3	0	0	0	0	0		0	0	0	0	0	0	0		0	0	0		0
315	15061200034																									38		16060801427	2016-06-08 14:57:13	2	1	0	0	0	1	0	1	0	0	0	0	0	0	0	0	0	0	0	0
316	14060201563																									39		15061200058
317	14060201574																									51		16060801445	2016-06-08 14:57:14	3	0	0	0	0	0		0	0	0	0	0	0	0		0	0	0		0
318	14060201584																									55		16060801342	2016-06-08 14:57:10	3	0	0	0	0	0		0	0	0	0	0	0	0		0	0	0		0
319	15061200003																									48		16060801333	2016-06-08 14:57:09	3	0	0	0	0	0		0	0	0	0	0	0	0		0	0	0		0
320	14060201587																									48		16060801334	2016-06-08 14:57:09	3	0	0	0	0	0		0	0	0	0	0	0	0		0	0	0		0
321	15060100342																									30		16060800479
322	15060101068																									35		16060801231	2016-06-08 14:57:05	3	0	0	0	0	0		0	0	0	0	0	0	0		0	0	0		0
323	15060100257																									34		16060800397	2016-06-08 14:56:28	3	0	0	0	0	0		0	0	0	0	0	0	0		0	0	0		0
324	15060100329																									28		16060800466	2016-06-08 14:56:31	3	0	0	0	0	0		0	0	0	0	0	0	0		0	0	0		0
325	15060100269																									36		16060800409	2016-06-08 14:56:29	3	0	0	0	0	0		0	0	0	0	0	0	0		0	0	0		0
326	15060100259																									34		16060800399	2016-06-08 14:56:28	3	0	0	0	0	0		0	0	0	0	0	0	0		0	0	0		0
327	15060101101																									36		16060801265	2016-06-08 14:57:06	3	0	0	0	0	0		0	0	0	0	0	0	0		0	0	0		0
328	15060100080																									38		16060800231	2016-06-08 14:56:20	2	1	0	0	1	0	0	0	0	0	0	0	1	0	0	0	0	0	0	0
329	15060100293																									31		16060800432	2016-06-08 14:56:30	3	0	0	0	0	0		0	0	0	0	0	0	0		0	0	0		0
330	15060101132																									35		16060801296	2016-06-08 14:57:08	3	0	0	0	0	0		0	0	0	0	0	0	0		0	0	0		0
331	15060101108																									33		17060201368	2017-06-02 17:00:34	1	0	0	0	0	0	0	0	0	0	0	0	0	0	0	0	0	0	0	0
332	15060100846																									44		16060800987	2016-06-08 14:56:54	3	0	0	0	0	0		0	0	0	0	0	0	0		0	0	0		0
333	15060100147																									48		16060800278	2016-06-08 14:56:23	3	0	0	0	0	0		0	0	0	0	0	0	0		0	0	0		0
334	15060100415																									35		16060800541	2016-06-08 14:56:34	3	0	0	0	0	0		0	0	0	0	0	0	0		0	0	0		0
335	15060100380																									30		16060800511	2016-06-08 14:56:33	3	0	0	0	0	0		0	0	0	0	0	0	0		0	0	0		0
336	15060100424																									29		17060200660	2017-06-02 17:00:04	1	0	0	0	0	0	0	0	0	0	0	0	0	0	0	0	0	0	0	0
337	15060100892																									32		16060801036	2016-06-08 14:56:56	3	0	0	0	0	0		0	0	0	0	0	0	0		0	0	0		0
338	15060100566																									31		15070800047
339	15060100532																									30		16060800662
340	15060100135																									31		16060800266
341	14060201680																									36		15061200043
342	15060100657																									29		16060800791	2016-06-08 14:56:46	3	0	0	0	0	0		0	0	0	0	0	0	0		0	0	0		0
343	15060100640																									31		16060800775	2016-06-08 14:56:45	3	0	0	0	0	0		0	0	0	0	0	0	0		0	0	0		0
344	15060100759																									55		16060800897	2016-06-08 14:56:50	3	0	0	0	0	0		0	0	0	0	0	0	0		0	0	0		0
345	14060201705																									32		16060800229	2016-06-08 14:56:20	3	0	0	0	0	0		0	0	0	0	0	0	0		0	0	0		0
346	15060100188																									32		16060800309	2016-06-08 14:56:24	3	0	0	0	0	0		0	0	0	0	0	0	0		0	0	0		0
347	15060100723																									30		16060800859
348	15060100793																									29		16060800929	2016-06-08 14:56:52	3	0	0	0	0	0		0	0	0	0	0	0	0		0	0	0		0
349	15060100335																									31		16060800472
350	15060101176																									39		16060801144	2016-06-08 14:57:01	3	0	0	0	0	0		0	0	0	0	0	0	0		0	0	0		0
351	15060101022																									31		16060801187
352	15060100799																									41		16060800935	2016-06-08 14:56:52	3	0	0	0	0	0		0	0	0	0	0	0	0		0	0	0		0
353	15060100503																									32		16060800632	2016-06-08 14:56:39	3	0	0	0	0	0		0	0	0	0	0	0	0		0	0	0		0
354	15060100404																									31		16060800533	2016-06-08 14:56:34	3	0	0	0	0	0		0	0	0	0	0	0	0		0	0	0		0
355	14060201818																									45		15050800565
356	14060202023																									42		15091100028	2015-09-11 07:53:01	3	0	0	0	0	0		0	0	0	0	0	0	0		0	0	0		0
357	15050800546																									39		16051800465
358	15050800543																									37		16051800591
359	15050800579																									52		16051800393	2016-05-18 10:20:28	3	0	0	0	0	0		0	0	0	0	0	0	0		0	0	0		0
360	15050800555																									40		16051800589
361	15050800506																									50		16051800443
362	15050800533																									36		16051800562
363	15050800516																									31		17050800172
364	15050800554																									40		16051800555
365	15040100106																									33		16032400085	2016-03-24 14:28:35	3	0	0	0	0	0		0	0	0	0	0	0	0		0	0	0		0
366	15040100117	2015-04-01 08:38:41	3	0	0	0	0	0		0	0	0	0	0	0	0		0	0	0		0				46	1
367	15040100112																									37		16032400089	2016-03-24 14:28:35	3	0	0	0	0	0		0	0	0	0	0	0	0		0	0	0		0
368	15040100099																									36		16032400086
369	15040100113																									37		16032400069	2016-03-24 14:28:34	3	0	0	0	0	0		0	0	0	0	0	0	0		0	0	0		0
370	15040100094																									29		16032400063
371	15040100110																									36		17022600059	2017-02-26 19:10:18	2	0	0	0	0	0	0	0	0	0	0	0	0	0	0	0	0	0	0	0
372	15040100107																									36		16032400062	2016-03-24 14:28:34	3	0	0	0	0	0		0	0	0	0	0	0	0		0	0	0		0
373	15040100093																									29		16032400093
374	15040100103																									31		16032400104	2016-03-24 14:28:36	3	0	0	0	0	0		0	0	0	0	0	0	0		0	0	0		0
375	15040100096																									31		16032400082
376	15040100105																									33		16032400061	2016-03-24 14:28:34	3	0	0	0	0	0		0	0	0	0	0	0	0		0	0	0		0
377	15040100109																									35		17022600032	2017-02-26 19:10:17	1	0	0	0	0	0	0	0	0	0	0	0	0	0	0	0	0	0	0	0
378	15040100102																									30		16032400098	2016-03-24 14:28:35	3	0	0	0	0	0		0	0	0	0	0	0	0		0	0	0		0
379	15040100108																									36		16032400109
380	15051400102																									40		16051200124
381	14060203229																									53		15051400347
382	14060300044																									44		15051600004
383	14060300037																									79		14070400002
384	14060400018																									30		15060100946
385	14060400064																									59		14070200011
386	14060500021																									37		15092500019
387	14060500039																									31		14123001175	2014-12-30 09:34:37	3	0	0	0	0	0		0	0	0	0	0	0	0		0	0	0		0
388	14060500119																									44		14090100009
389	14060600009																									38		15042900451	2015-04-29 15:47:49	3	0	0	0	0	0		0	0	0	0	0	0	0		0	0	0		0
390	16051000416	2016-05-10 15:08:16	3	0	0	0	0	0		0	0	0	0	0	0	0		0	0	0		0				54	1	17050200385	2017-05-02 15:27:11	1	0	0	0	0	0	0	0	0	0	0	0	0	0	0	0	0	0	0	0
391	14060600036																									54		15052500045	2015-05-25 10:29:36	3	0	0	0	0	0		0	0	0	0	0	0	0		0	0	0		0
392	14060900028																									39		15031600013	2015-03-16 08:06:43	3	0	0	0	0	0		0	0	0	0	0	0	0		0	0	0		0
393	14061000032																									42		15042800075
394	14061000059																									57		14082900023
395	14061100157																									50		14082900006
396	14061100198																									55		14082900038
397	14061100302																									45		15090800057	2015-09-08 08:10:33	3	0	0	0	0	0		0	0	0	0	0	0	0		0	0	0		0
398	14061100307																									50		15060500243
399	14061100404																									42		15060500257	2015-06-05 08:20:55	3	0	0	0	0	0		0	0	0	0	0	0	0		0	0	0		0
400	14123001340	2014-12-30 09:34:49	3	0	0	0	0	0		0	0	0	0	0	0	0		0	0	0		0				34	1	16010401457	2016-01-04 10:35:53	3	0	0	0	0	0		0	0	0	0	0	0	0		0	0	0		0
401	14061300076																									45		15050700065
402	14123000703																									33		16010401064	2016-01-04 10:35:35	3	0	0	0	0	0		0	0	0	0	0	0	0		0	0	0		0
403	15061000181																									33		16062200265
404	17050200104	2017-05-02 15:26:57	1	0	0	0	0	0	0	0	0	0	0	0	0	0	0	0	0	0	0	0	0	0	0	36	1	18042800167	2018-04-28 16:38:02	1	1	0	0	0	0	0	0	0	0	0	0	1	0	0	0	0	0	0	0
405	14061700595																									32		15061000369
406	14061700614																									36		15061000142
407	14061800014																									35		15040100424
408	14061800039																									46		14082900017
409	14061800048																									73		14123002080	2014-12-30 09:35:42	3	0	0	0	0	0		0	0	0	0	0	0	0		0	0	0		0
410	14061800061																									27		15050700135
411	14061800082																									41		14082900018
412	14061900019																									45		16060800919	2016-06-08 14:56:51	3	0	0	0	0	0		0	0	0	0	0	0	0		0	0	0		0
413	14123001620	2014-12-30 09:35:09	3	0	0	0	0	0		0	0	0	0	0	0	0		0	0	0		0				44	1	16010401135
414	14062000060																									42		15082000882	2015-08-20 14:44:00	3	0	0	0	0	0		0	0	0	0	0	0	0		0	0	0		0
415	14062400001																									63		14123001935	2014-12-30 09:35:32	3	0	0	0	0	0		0	0	0	0	0	0	0		0	0	0		0
416	14062400020																									48		16102000013	2016-10-20 08:10:48	3	0	0	0	0	0		0	0	0	0	0	0	0		0	0	0		0
417	14062400052																									42		15070700104
418	14062400056																									38		15070700110
419	14062400168																									51		15082000801	2015-08-20 14:43:57	3	0	0	0	0	0		0	0	0	0	0	0	0		0	0	0		0
420	14062400166																									61		14082900035
421	14062400167																									63		14082900040
422	14062500046																									41		15070700213
423	14062500066																									34		15060100240
424	14062500070																									59		14070200013
425	14062500084																									30		15070700252
426	14062500111																									37		15070700264
427	14123001252	2014-12-30 09:34:42	3	0	0	0	0	0		0	0	0	0	0	0	0		0	0	0		0				33	1	16010401347	2016-01-04 10:35:48	3	0	0	0	0	0		0	0	0	0	0	0	0		0	0	0		0
428	14062500126																									30		14070200030
429	14062500185																									41		15070701209
430	14062600032																									76		15021700872	2015-02-17 10:36:07	3	0	0	0	0	0		0	0	0	0	0	0	0		0	0	0		0
431	17080900231	2017-08-09 13:51:25	1	1	0	0	0	0	0	0	1	0	0	1	0	0	0	0	0	0	0	0	0	0	0	56	1
432	14062600062																									52		15062901363	2015-06-29 13:49:58	3	0	0	0	0	0		0	0	0	0	0	0	0		0	0	0		0
433	14062600063																									53		15062901589	2015-06-29 13:50:08	2	1	0	0	0	0	0	0	0	0	0	0	0	1	0	0	0	0	0	0
434	14062600064																									50		15062901588	2015-06-29 13:50:08	3	0	0	0	0	0		0	0	0	0	0	0	0		0	0	0		0
435	16081600183	2016-08-16 14:34:07	3	0	0	0	0	0		0	0	0	0	0	0	0		0	0	0		0				55	1	17080900159	2017-08-09 13:51:21	1	0	0	0	0	0	0	0	0	0	0	0	0	0	0	0	0	0	0	0
436	14062600077																									58		15062901451	2015-06-29 13:50:02	3	0	0	0	0	0		0	0	0	0	0	0	0		0	0	0		0
437	14062600084																									55		15062901501	2015-06-29 13:50:04	3	0	0	0	0	0		0	0	0	0	0	0	0		0	0	0		0
438	14062600086																									47		15070100001	2015-07-01 07:36:14	3	0	0	0	0	0		0	0	0	0	0	0	0		0	0	0		0
439	14062600095																									50		15062901458	2015-06-29 13:50:02	3	0	0	0	0	0		0	0	0	0	0	0	0		0	0	0		0
440	17080900192	2017-08-09 13:51:23	1	0	0	0	0	0	0	0	0	0	0	0	0	0	0	0	0	0	0	0	0	0	0	42	1
441	14062600097																									45		15062901486	2015-06-29 13:50:04	3	0	0	0	0	0		0	0	0	0	0	0	0		0	0	0		0
442	15062901372	2015-06-29 13:49:59	3	0	0	0	0	0		0	0	0	0	0	0	0		0	0	0		0				36	1	17080900163	2017-08-09 13:51:22	1	0	0	0	0	0	0	0	0	0	0	0	0	0	0	0	0	0	0	0
443	16081600369																									35		18051700506	2018-05-17 13:48:43	1	0	0	0	0	0	0	0	0	0	0	0	0	0	0	0	0	0	0	0
444	14062600108																									54		15062901404	2015-06-29 13:50:00	3	0	0	0	0	0		0	0	0	0	0	0	0		0	0	0		0
445	14062600109																									54		15062901581	2015-06-29 13:50:08	3	0	0	0	0	0		0	0	0	0	0	0	0		0	0	0		0
446	14062600110																									37		15062901399	2015-06-29 13:50:00	3	0	0	0	0	0		0	0	0	0	0	0	0		0	0	0		0
447	15062901484	2015-06-29 13:50:03	3	0	0	0	0	0		0	0	0	0	0	0	0		0	0	0		0				34	1	18051700323	2018-05-17 13:48:34	1	0	0	0	0	0	0	0	0	0	0	0	0	0	0	0	0	0	0	0
448	14062600119																									48		16081600203	2016-08-16 14:34:08	3	0	0	0	0	0		0	0	0	0	0	0	0		0	0	0		0
449	17080900205	2017-08-09 13:51:24	1	0	0	0	0	0	0	0	0	0	0	0	0	0	0	0	0	0	0	0	0	0	0	48	1	18051700417	2018-05-17 13:48:39	1	0	0	0	0	0	0	0	0	0	0	0	0	0	0	0	0	0	0	0
450	14062600136																									57		15062901462	2015-06-29 13:50:03	3	0	0	0	0	0		0	0	0	0	0	0	0		0	0	0		0
451	14062600141																									51		15062901575	2015-06-29 13:50:07	3	0	0	0	0	0		0	0	0	0	0	0	0		0	0	0		0
452	15062901376	2015-06-29 13:49:59	3	0	0	0	0	0		0	0	0	0	0	0	0		0	0	0		0				49	1	16081600196	2016-08-16 14:34:07	3	0	0	0	0	0		0	0	0	0	0	0	0		0	0	0		0
453	14062600155																									36		15062901561	2015-06-29 13:50:07	3	0	0	0	0	0		0	0	0	0	0	0	0		0	0	0		0
454	14062600158																									55		17080900177	2017-08-09 13:51:22	1	0	0	0	0	0	0	0	0	0	0	0	0	0	0	0	0	0	0	0
455	17080900224	2017-08-09 13:51:24	1	0	0	0	0	0	0	0	0	0	0	0	0	0	0	0	0	0	0	0	0	0	0	73	1
456	18051700361	2018-05-17 13:48:36	1	0	0	0	0	0	0	0	0	0	0	0	0	0	0	0	0	0	0	0	0	0	0	54	1
457	14062600224																									48		15062901378	2015-06-29 13:49:59	3	0	0	0	0	0		0	0	0	0	0	0	0		0	0	0		0
458	14062600227																									72		15063000006	2015-06-30 07:57:20	3	0	0	0	0	0		0	0	0	0	0	0	0		0	0	0		0
459	16081600430	2016-08-16 14:34:17	3	0	0	0	0	0		0	0	0	0	0	0	0		0	0	0		0				79	1
460	16081600437	2016-08-16 14:34:18	3	0	0	0	0	0		0	0	0	0	0	0	0		0	0	0		0				80	1
461	17080900226	2017-08-09 13:51:25	1	0	0	0	0	0	0	0	0	0	0	0	0	0	0	0	0	0	0	0	0	0	0	77	1
462	14062600296																									72		15063000008	2015-06-30 07:59:00	3	0	0	0	0	0		0	0	0	0	0	0	0		0	0	0		0
463	14062600299																									44		17080900191	2017-08-09 13:51:23	1	0	0	0	0	0	0	0	0	0	0	0	0	0	0	0	0	0	0	0
464	17080900225	2017-08-09 13:51:25	1	0	0	0	0	0	0	0	0	0	0	0	0	0	0	0	0	0	0	0	0	0	0	74	1
465	14062600308																									56		15062901382	2015-06-29 13:49:59	3	0	0	0	0	0		0	0	0	0	0	0	0		0	0	0		0
466	14062600309																									36		15062901441	2015-06-29 13:50:01	3	0	0	0	0	0		0	0	0	0	0	0	0		0	0	0		0
467	14062600313																									43		15062901418	2015-06-29 13:50:01	3	0	0	0	0	0		0	0	0	0	0	0	0		0	0	0		0
468	14062600318																									35		15062901374	2015-06-29 13:49:59	3	0	0	0	0	0		0	0	0	0	0	0	0		0	0	0		0
469	15062901566	2015-06-29 13:50:07	3	0	0	0	0	0		0	0	0	0	0	0	0		0	0	0		0				52	1
470	15062901489	2015-06-29 13:50:04	3	0	0	0	0	0		0	0	0	0	0	0	0		0	0	0		0				43	1	16081600301	2016-08-16 14:34:12	3	0	0	0	0	0		0	0	0	0	0	0	0		0	0	0		0
471	14062600325																									31		17080900199	2017-08-09 13:51:23	1	0	0	0	0	0	0	0	0	0	0	0	0	0	0	0	0	0	0	0
472	14062600332																									37		15062901433	2015-06-29 13:50:01	3	0	0	0	0	0		0	0	0	0	0	0	0		0	0	0		0
473	15062901368	2015-06-29 13:49:59	3	0	0	0	0	0		0	0	0	0	0	0	0		0	0	0		0				51	1	16081600187	2016-08-16 14:34:07	3	0	0	0	0	0		0	0	0	0	0	0	0		0	0	0		0
474	16081600319	2016-08-16 14:34:12	3	0	0	0	0	0		0	0	0	0	0	0	0		0	0	0		0				43	1	17081100025	2017-08-11 08:41:24	1	0	0	0	0	0	0	0	0	0	0	0	0	0	0	0	0	0	0	0
475	14062600363																									34		15062901542	2015-06-29 13:50:06	3	0	0	0	0	0		0	0	0	0	0	0	0		0	0	0		0
476	16081600377	2016-08-16 14:34:15	3	0	0	0	0	0		0	0	0	0	0	0	0		0	0	0		0				35	1	17080900206	2017-08-09 13:51:24	1	0	0	0	0	0	0	0	0	0	0	0	0	0	0	0	0	0	0	0
477	17080900165	2017-08-09 13:51:22	1	0	0	0	0	0	0	0	0	0	0	0	0	0	0	0	0	0	0	0	0	0	0	32	1
478	14062600382																									38		15062901482	2015-06-29 13:50:03	3	0	0	0	0	0		0	0	0	0	0	0	0		0	0	0		0
479	14062600384																									40		15062901383	2015-06-29 13:49:59	3	0	0	0	0	0		0	0	0	0	0	0	0		0	0	0		0
480	14062600386																									45		15062901381	2015-06-29 13:49:59	3	0	0	0	0	0		0	0	0	0	0	0	0		0	0	0		0
481	14062600401																									46		15062901495	2015-06-29 13:50:04	3	0	0	0	0	0		0	0	0	0	0	0	0		0	0	0		0
482	14062600412																									55		15062901570	2015-06-29 13:50:07	2	1	0	0	0	0	0	0	0	0	0	0	0	0	0	0	0	1	0	0
483	14062600414																									53		15062901461	2015-06-29 13:50:03	3	0	0	0	0	0		0	0	0	0	0	0	0		0	0	0		0
484	14062600424																									39		15062901388	2015-06-29 13:49:59	3	0	0	0	0	0		0	0	0	0	0	0	0		0	0	0		0
485	15062901514																									33		16081600329	2016-08-16 14:34:13	3	0	0	0	0	0		0	0	0	0	0	0	0		0	0	0		0
486	14062600429																									32		15062901442	2015-06-29 13:50:01	3	0	0	0	0	0		0	0	0	0	0	0	0		0	0	0		0
487	16081600321	2016-08-16 14:34:12	3	0	0	0	0	0		0	0	0	0	0	0	0		0	0	0		0				32	1	17080900198	2017-08-09 13:51:23	1	0	0	0	0	0	0	0	0	0	0	0	0	0	0	0	0	0	0	0
488	14062600435																									41		15062901444	2015-06-29 13:50:02	3	0	0	0	0	0		0	0	0	0	0	0	0		0	0	0		0
489	14062600437																									53		15062901453	2015-06-29 13:50:02	3	0	0	0	0	0		0	0	0	0	0	0	0		0	0	0		0
490	14062600443																									47		15062901499	2015-06-29 13:50:04	3	0	0	0	0	0		0	0	0	0	0	0	0		0	0	0		0
491	14062600445																									65		15063000001	2015-06-30 07:34:44	3	0	0	0	0	0		0	0	0	0	0	0	0		0	0	0		0
492	14062600446																									41		15062901417	2015-06-29 13:50:01	3	0	0	0	0	0		0	0	0	0	0	0	0		0	0	0		0
493	16081600199	2016-08-16 14:34:07	3	0	0	0	0	0		0	0	0	0	0	0	0		0	0	0		0				28	1	17080900166	2017-08-09 13:51:22	1	0	0	0	0	0	0	0	0	0	0	0	0	0	0	0	0	0	0	0
494	14062600452																									55		15062901392	2015-06-29 13:49:59	3	0	0	0	0	0		0	0	0	0	0	0	0		0	0	0		0
495	14062600453																									39		16081600184	2016-08-16 14:34:07	3	0	0	0	0	0		0	0	0	0	0	0	0		0	0	0		0
496	14062600455																									44		17080900182	2017-08-09 13:51:23	1	0	0	0	0	0	0	0	0	0	0	0	0	0	0	0	0	0	0	0
497	14062600456																									39		15062901408	2015-06-29 13:50:00	3	0	0	0	0	0		0	0	0	0	0	0	0		0	0	0		0
498	14062600459																									57		15062901454	2015-06-29 13:50:02	3	0	0	0	0	0		0	0	0	0	0	0	0		0	0	0		0
499	14062600461																									76		15063000005	2015-06-30 07:56:47	3	0	0	0	0	0		0	0	0	0	0	0	0		0	0	0		0
500	14062600463																									52		15062901568	2015-06-29 13:50:07	3	0	0	0	0	0		0	0	0	0	0	0	0		0	0	0		0
501	14062600467																									36		15062901362	2015-06-29 13:49:58	2	1	0	0	0	0	0	0	0	0	0	0	1	0	0	0	0	1	0	0
502	16081600238	2016-08-16 14:34:09	3	0	0	0	0	0		0	0	0	0	0	0	0		0	0	0		0				45	1	17080900176	2017-08-09 13:51:22	1	0	0	0	0	0	0	0	0	0	0	0	0	0	0	0	0	0	0	0
503	14062600486																									55		15062901528	2015-06-29 13:50:05	3	0	0	0	0	0		0	0	0	0	0	0	0		0	0	0		0
504	14062600488																									55		15062901531	2015-06-29 13:50:05	3	0	0	0	0	0		0	0	0	0	0	0	0		0	0	0		0
505	14062600489																									63		15070200041	2015-07-02 09:03:56	3	0	0	0	0	0		0	0	0	0	0	0	0		0	0	0		0
506	15062901421	2015-06-29 13:50:01	3	0	0	0	0	0		0	0	0	0	0	0	0		0	0	0		0				31	1	16081600234	2016-08-16 14:34:09	3	0	0	0	0	0		0	0	0	0	0	0	0		0	0	0		0
507	14062600493																									40		15062901447	2015-06-29 13:50:02	2	1	0	0	0	0	0	0	0	0	0	0	0	0	0	0	0	0	0	1
508	18051700317	2018-05-17 13:48:34	1	0	0	0	0	0	0	0	0	0	0	0	0	0	0	0	0	0	0	0	0	0	0	38	1
509	14062600498																									38		15062901485	2015-06-29 13:50:04	3	0	0	0	0	0		0	0	0	0	0	0	0		0	0	0		0
510	14062600504																									40		14081400088
511	14062600522																									54		14092300019
512	14062600536																									32		15070700338
513	14062700007																									35		15062901424	2015-06-29 13:50:01	3	0	0	0	0	0		0	0	0	0	0	0	0		0	0	0		0
514	15011900026																									25		16010400589	2016-01-04 10:35:15	3	0	0	0	0	0		0	0	0	0	0	0	0		0	0	0		0
515	14062700072																									38		15062901398	2015-06-29 13:50:00	3	0	0	0	0	0		0	0	0	0	0	0	0		0	0	0		0
516	14062700082																									30		15062901467
517	14062700083																									31		15070700340
518	14123001190	2014-12-30 09:34:38	3	0	0	0	0	0		0	0	0	0	0	0	0		0	0	0		0				31	1	16010401264	2016-01-04 10:35:44	3	0	0	0	0	0		0	0	0	0	0	0	0		0	0	0		0
519	14062700066																									43		14092300023
520	15031100411	2015-03-11 09:20:17	3	0	0	0	0	0		0	0	0	0	0	0	0		0	0	0		0				37	1	16042101302	2016-04-21 15:34:42	3	0	0	0	0	0		0	0	0	0	0	0	0		0	0	0		0
521	14062700114																									63		15071500309
522	14062700116																									79		15071500102	2015-07-15 10:00:44	3	0	0	0	0	0		0	0	0	0	0	0	0		0	0	0		0
523	14062700129																									36		15070701176
524	14062700133																									79		15071500103
525	14062700158																									63		15071500308
526	14062700167																									75		15071500181
527	14062700175																									82		17071700002	2017-07-17 07:29:50	1	0	0	0	0	0	0	0	0	0	0	0	0	0	0	0	0	0	0	0
528	14062700177																									82		15071500074
529	14062700202																									74		15071500196	2015-07-15 10:00:49	3	0	0	0	0	0		0	0	0	0	0	0	0		0	0	0		0
530	14062700208																									78		15071500275	2015-07-15 10:00:53	3	0	0	0	0	0		0	0	0	0	0	0	0		0	0	0		0
531	14062700226																									74		15071500286
532	14062700255																									69		15071500299	2015-07-15 10:00:54	3	0	0	0	0	0		0	0	0	0	0	0	0		0	0	0		0
533	14062700259																									78		14093000004
534	14062700260																									65		15071500248
535	14062700263																									35		15070701173	2015-07-07 15:14:02	3	0	0	0	0	0		0	0	0	0	0	0	0		0	0	0		0
536	14062700266																									77		15071500277	2015-07-15 10:00:53	3	0	0	0	0	0		0	0	0	0	0	0	0		0	0	0		0
537	14062700272																									76		15071500279
538	14062700297																									57		15070701294
539	14062700303																									49		15070701250	2015-07-07 15:14:05	3	0	0	0	0	0		0	0	0	0	0	0	0		0	0	0		0
540	14062700308																									41		15070701208	2015-07-07 15:14:03	3	0	0	0	0	0		0	0	0	0	0	0	0		0	0	0		0
541	14062700311																									53		15070701277	2015-07-07 15:14:06	3	0	0	0	0	0		0	0	0	0	0	0	0		0	0	0		0
542	14062700313																									35		15070701171	2015-07-07 15:14:02	3	0	0	0	0	0		0	0	0	0	0	0	0		0	0	0		0
543	14062700314																									54		15070701290	2015-07-07 15:14:06	3	0	0	0	0	0		0	0	0	0	0	0	0		0	0	0		0
544	14062700316																									59		15071500261
545	14062700328																									53		15070701275	2015-07-07 15:14:06	3	0	0	0	0	0		0	0	0	0	0	0	0		0	0	0		0
546	14062700329																									47		15070701237
547	15070701218	2015-07-07 15:14:03	3	0	0	0	0	0		0	0	0	0	0	0	0		0	0	0		0				44	1	17050900235	2017-05-09 14:11:33	1	0	0	0	0	0	0	0	0	0	0	0	0	0	0	0	0	0	0	0
548	14062700338																									45		15070701223
549	14062700342																									47		15070701243	2015-07-07 15:14:04	3	0	0	0	0	0		0	0	0	0	0	0	0		0	0	0		0
550	15031100406	2015-03-11 09:20:17	3	0	0	0	0	0		0	0	0	0	0	0	0		0	0	0		0				33	1
551	14062700353																									51		15070701263
552	14062700357																									42		15070701214
553	14062700363																									63		15071500255	2015-07-15 10:00:52	3	0	0	0	0	0		0	0	0	0	0	0	0		0	0	0		0
554	14062700365																									54		15070701288
555	14062700372																									57		15070701295	2015-07-07 15:14:07	3	0	0	0	0	0		0	0	0	0	0	0	0		0	0	0		0
556	14062700387																									52		15070701267
557	14062700397																									80		15071500105	2015-07-15 10:00:44	3	0	0	0	0	0		0	0	0	0	0	0	0		0	0	0		0
558	14062700404																									41		15070701204
559	14062700410																									62		15070701302
560	14062700414																									52		15070701270
561	14062700426																									38		15070701188
562	15061600009																									50		16071800256
563	16071800171	2016-07-18 09:13:08	3	0	0	0	0	0		0	0	0	0	0	0	0		0	0	0		0				49	1	17060100171
564	15070701309	2015-07-07 15:14:07	3	0	0	0	0	0		0	0	0	0	0	0	0		0	0	0		0				67	1
565	14062700436																									51		15070701265	2015-07-07 15:14:05	3	0	0	0	0	0		0	0	0	0	0	0	0		0	0	0		0
566	16071800227																									33		17050900304	2017-05-09 14:11:37	1	0	0	0	0	0	0	0	0	0	0	0	0	0	0	0	0	0	0	0
567	15070701106																									30		16071800739
568	16071800287	2016-07-18 09:13:14	3	0	0	0	0	0		0	0	0	0	0	0	0		0	0	0		0				35	1	17050900291	2017-05-09 14:11:36	1	0	0	0	0	0	0	0	0	0	0	0	0	0	0	0	0	0	0	0
569	14062700454																									36		15070701177	2015-07-07 15:14:02	3	0	0	0	0	0		0	0	0	0	0	0	0		0	0	0		0
570	14062700455																									55		15070701291	2015-07-07 15:14:06	3	0	0	0	0	0		0	0	0	0	0	0	0		0	0	0		0
571	14062700467																									48		15070701245
572	15070701205																									42		16071800893	2016-07-18 15:59:18	3	0	0	0	0	0		0	0	0	0	0	0	0		0	0	0		0
573	14062700480																									53		15070701278
574	14062700489																									67		16071900060
575	14062700494																									52		15070701271
576	14062700520																									81		15071500076	2015-07-15 10:00:43	3	0	0	0	0	0		0	0	0	0	0	0	0		0	0	0		0
577	14062700523																									79		15071500269	2015-07-15 10:00:52	3	0	0	0	0	0		0	0	0	0	0	0	0		0	0	0		0
578	14062700528																									61		15071500311
579	14062700532																									69		15071500236	2015-07-15 10:00:51	3	0	0	0	0	0		0	0	0	0	0	0	0		0	0	0		0
580	14062700533																									36		15070701182
581	14062700539																									81		15071500080
582	14062700540																									82		15071500072
583	14062700542																									83		15071500065	2015-07-15 10:00:43	3	0	0	0	0	0		0	0	0	0	0	0	0		0	0	0		0
584	15071500256																									63		16071801427
585	14062700570																									39		15070701196
586	14062700572																									29		15070701145
587	14062700595																									38		15070701194	2015-07-07 15:14:03	3	0	0	0	0	0		0	0	0	0	0	0	0		0	0	0		0
588	14062700599																									48		15070701246
589	14062700601																									50		15070701260
590	14062700607																									34		15070701166
591	14062700609																									45		15070701227
592	15070701163																									33		16071801202
593	18041100409	2018-04-11 15:07:56	1	0	0	0	0	0	0	0	0	0	0	0	0	0	0	0	0	0	0	0	0	0	0	32	1	18070600915
594	14062700618																									57		15070701298	2015-07-07 15:14:07	3	0	0	0	0	0		0	0	0	0	0	0	0		0	0	0		0
595	15070701221																									46		16071800883
596	14062700625																									55		15070701280	2015-07-07 15:14:06	3	0	0	0	0	0		0	0	0	0	0	0	0		0	0	0		0
597	14062700626																									36		15070701181	2015-07-07 15:14:02	3	0	0	0	0	0		0	0	0	0	0	0	0		0	0	0		0
598	14062700627																									47		15070701234
599	14062700631																									49		15070701255
600	14062700632																									38		15070701191
601	14062700635																									30		15070701149
602	14062700637																									49		15070701248	2015-07-07 15:14:05	3	0	0	0	0	0		0	0	0	0	0	0	0		0	0	0		0
603	14062700640																									35		15070701126
604	14062700650																									35		15070701128
605	14062700651																									52		15070701268	2015-07-07 15:14:06	3	0	0	0	0	0		0	0	0	0	0	0	0		0	0	0		0
606	14062700652																									31		15070701111
607	15070701124																									34		16071800230
608	14062700663																									32		15070701156
609	14062700677																									48		15070701247
610	14062700692																									57		15070701296
611	14062700693																									58		15070701299
612	14062700694																									52		15070701272
613	14062700713																									45		14071100050
614	14062700719																									46		15070701229	2015-07-07 15:14:04	3	0	0	0	0	0		0	0	0	0	0	0	0		0	0	0		0
615	14062700722																									46		15091500032	2015-09-15 08:35:48	3	0	0	0	0	0		0	0	0	0	0	0	0		0	0	0		0
616	14062700724																									31		15070701105
617	14062700729																									54		15070701289
618	14062700741																									33		15070701119
619	14062700746																									39		15070701195	2015-07-07 15:14:03	3	0	0	0	0	0		0	0	0	0	0	0	0		0	0	0		0
620	14062700748																									36		15070701180
621	14062700749																									45		15070701225	2015-07-07 15:14:04	3	0	0	0	0	0		0	0	0	0	0	0	0		0	0	0		0
622	14062700750																									54		15070701283	2015-07-07 15:14:06	3	0	0	0	0	0		0	0	0	0	0	0	0		0	0	0		0
623	14062700751																									35		15070701130
624	14062700752																									51		15070701266
625	14062700757																									47		16071800813
626	14062700759																									30		15070701098	2015-07-07 15:13:59	3	0	0	0	0	0		0	0	0	0	0	0	0		0	0	0		0
627	15070701233	2015-07-07 15:14:04	3	0	0	0	0	0		0	0	0	0	0	0	0		0	0	0		0				47	1	16071800815
628	14062700774																									70		15071500229
629	14062700779																									38		15070701190
630	14062700804																									61		15071500258	2015-07-15 10:00:52	3	0	0	0	0	0		0	0	0	0	0	0	0		0	0	0		0
631	14062700815																									33		15070701164
632	15070701142																									27		16071800754
633	16071800367	2016-07-18 09:13:18	3	0	0	0	0	0		0	0	0	0	0	0	0		0	0	0		0				33	1	18070900364
634	14062700858																									32		15070701159
635	14062700860																									53		15070701279
636	16071800245																									37		17050900316
637	16071800321																									34		17050900338
638	15070701154																									32		16071800233	2016-07-18 09:13:11	3	0	0	0	0	0		0	0	0	0	0	0	0		0	0	0		0
639	15070701161																									32		16071800654
640	14062700881																									55		15070701286
641	14062700882																									55		15070701287	2015-07-07 15:14:06	3	0	0	0	0	0		0	0	0	0	0	0	0		0	0	0		0
642	14062700887																									53		15070701273	2015-07-07 15:14:06	2	1	0	0	1	0	0	0	0	0	0	0	0	0	0	0	0	0	0	0
643	14062700897																									56		15070701292
644	14062700899																									47		15070701240
645	14062700901																									43		15070701211	2015-07-07 15:14:03	3	0	0	0	0	0		0	0	0	0	0	0	0		0	0	0		0
646	14062700910																									47		15070701235	2015-07-07 15:14:04	3	0	0	0	0	0		0	0	0	0	0	0	0		0	0	0		0
647	14062700920																									38		15070701192
648	14062700922																									38		15070701185	2015-07-07 15:14:02	3	0	0	0	0	0		0	0	0	0	0	0	0		0	0	0		0
649	14062700936																									58		15071500317
650	14062700941																									41		15070701210	2015-07-07 15:14:03	3	0	0	0	0	0		0	0	0	0	0	0	0		0	0	0		0
651	14062700944																									34		15070701167	2015-07-07 15:14:02	3	0	0	0	0	0		0	0	0	0	0	0	0		0	0	0		0
652	14062700947																									75		15070900002	2015-07-09 07:33:41	3	0	0	0	0	0		0	0	0	0	0	0	0		0	0	0		0
653	14062700950																									80		15071500132	2015-07-15 10:00:46	3	0	0	0	0	0		0	0	0	0	0	0	0		0	0	0		0
654	14062700957																									54		15070701285
655	14062700958																									46		15070701231
656	14062700965																									50		15070701262
657	14062700966																									54		15070701282
658	14062700972																									43		15070701216
659	15070701146																									30		16071800796	2016-07-18 15:59:14	3	0	0	0	0	0		0	0	0	0	0	0	0		0	0	0		0
660	14062700983																									47		15070701241	2015-07-07 15:14:04	3	0	0	0	0	0		0	0	0	0	0	0	0		0	0	0		0
661	14062700986																									49		14092600034
662	14062700996																									28		15070701080
663	15061200031																									42		16071800305
664	14062700998																									34		15070701169
665	14062701000																									44		15070701220
666	14062701003																									29		15070701144
667	16071800072																									36		17060100073
668	14063000002																									58		15042900536	2015-04-29 15:47:53	3	0	0	0	0	0		0	0	0	0	0	0	0		0	0	0		0
669	14063000020																									28		15070701081
670	14063000034																									27		15070701077
671	14070100042																									29		15060300062
672	14070100139																									38		15070701189
673	14070100147																									28		15070701082
674	14070200019																									31		16042100820	2016-04-21 15:34:22	3	0	0	0	0	0		0	0	0	0	0	0	0		0	0	0		0
675	14070200020																									31		15031100444	2015-03-11 09:20:19	3	0	0	0	0	0		0	0	0	0	0	0	0		0	0	0		0
676	14070200018																									37		15033000293
677	14070200024																									56		15070701293
678	15060500453																									43		16011500029
679	14070500082																									54		15080501529
680	14070600067																									34		15063000630
681	14070600109																									33		15063001397
682	16071801447	2016-07-18 15:59:42	3	0	0	0	0	0		0	0	0	0	0	0	0		0	0	0		0				57	1	17071100935
683	14070700040																									37		15070701184
684	15040900957																									69		16031101633	2016-03-11 15:34:50	3	0	0	0	0	0		0	0	0	0	0	0	0		0	0	0		0
685	14070700085																									31		17030200182
686	14070700651																									59		15091100069	2015-09-11 08:21:15	3	0	0	0	0	0		0	0	0	0	0	0	0		0	0	0		0
687	17090500054	2017-09-05 07:56:38	1	0	0	0	0	0	0	0	0	0	0	0	0	0	0	0	0	0	0	0	0	0	0	62	1
688	15063000300																									39		16070900816
689	14070701686																									49		15063000802
690	14070701744																									34		15062900684
691	14070701815																									30		15062900679
692	15041200738																									52		17022800759	2017-02-28 14:53:05	2	0	0	0	0	0	0	0	0	0	0	0	0	0	0	0	0	0	0	0
693	14070702284																									28		15062900746
694	14070702297																									33		15062900760
695	14070800023																									33		15062900694
696	14070800306																									55		15042900528	2015-04-29 15:47:53	3	0	0	0	0	0		0	0	0	0	0	0	0		0	0	0		0
697	16010402119																									27		18010300875	2018-01-03 10:25:19	1	0	0	0	0	0	0	0	0	0	0	0	0	0	0	0	0	0	0	0
698	14071000001																									29		15032300118	2015-03-23 15:38:34	3	0	0	0	0	0		0	0	0	0	0	0	0		0	0	0		0
699	14071000644																									34		15031101309	2015-03-11 09:21:01	3	0	0	0	0	0		0	0	0	0	0	0	0		0	0	0		0
700	14071100041																									37		15050600574
701	14123002480	2014-12-30 09:36:11	3	0	0	0	0	0		0	0	0	0	0	0	0		0	0	0		0				44	1	16010401812	2016-01-04 10:36:08	3	0	0	0	0	0		0	0	0	0	0	0	0		0	0	0		0
702	14071500006																									30		15060100504
703	14071800012																									64		15042900568	2015-04-29 15:47:55	3	0	0	0	0	0		0	0	0	0	0	0	0		0	0	0		0
704	14071800122																									43		15110600620	2015-11-06 15:31:39	3	0	0	0	0	0		0	0	0	0	0	0	0		0	0	0		0
705	14071800168																									44		15110600241
706	14071800250																									41		15110600754
707	14071800404																									43		15110600533
708	14071800692																									37		15082700191
709	14071800896																									47		15110600247	2015-11-06 15:31:23	3	0	0	0	0	0		0	0	0	0	0	0	0		0	0	0		0
710	14072100033																									31		14123001229	2014-12-30 09:34:40	3	0	0	0	0	0		0	0	0	0	0	0	0		0	0	0		0
711	14072200131																									70		14120500019
712	16081600402	2016-08-16 14:34:16	3	0	0	0	0	0		0	0	0	0	0	0	0		0	0	0		0				38	1	17080900218	2017-08-09 13:51:24	1	0	0	0	0	0	0	0	0	0	0	0	0	0	0	0	0	0	0	0
713	15010900048																									25		16010400538
714	15010700120																									25		16010400614	2016-01-04 10:35:16	3	0	0	0	0	0		0	0	0	0	0	0	0		0	0	0		0
715	14072500426																									38		15073100954
716	15031100943	2015-03-11 09:20:44	3	0	0	0	0	0		0	0	0	0	0	0	0		0	0	0		0				47	1	16042101838	2016-04-21 15:35:06	3	0	0	0	0	0		0	0	0	0	0	0	0		0	0	0		0
717	14072500736																									34		15073100983
718	14072500798																									33		15073100973
719	14072500808																									30		16061200172	2016-06-12 14:40:43	3	0	0	0	0	0		0	0	0	0	0	0	0		0	0	0		0
720	14072501140																									34		15073100988
721	16010400551																									25		16122901479
722	16010400543																									25		16122901481	2016-12-29 13:46:18	2	0	0	0	0	0	0	0	0	0	0	0	0	0	0	0	0	0	0	0
723	15010900013																									26		16010400600
724	16010400531																									25		16122901513	2016-12-29 13:46:19	2	0	0	0	0	0	0	0	0	0	0	0	0	0	0	0	0	0	0	0
725	15010900049																									27		16010400824
726	16010400601																									25		16122900960
727	15011600052																									24		16010400539
728	14072800111																									56		15042900529	2015-04-29 15:47:53	3	0	0	0	0	0		0	0	0	0	0	0	0		0	0	0		0
729	16010400713																									26		16122900956	2016-12-29 13:45:55	2	0	0	0	0	0	0	0	0	0	0	0	0	0	0	0	0	0	0	0
730	16010400733																									27		16122900962	2016-12-29 13:45:55	2	1	0	0	0	0	0	0	0	0	0	0	0	0	0	0	1	0	0	0
731	16010402118	2016-01-04 15:31:00	3	0	0	0	0	0		0	0	0	0	0	0	0		0	0	0		0				25	1	16122900957	2016-12-29 13:45:55	2	0	0	0	0	0	0	0	0	0	0	0	0	0	0	0	0	0	0	0
732	15060900001																									51		16060801323	2016-06-08 14:57:09	3	0	0	0	0	0		0	0	0	0	0	0	0		0	0	0		0
733	14081900008																									26		15010600018
734	14072900022																									29		15040100431
735	16010402116																									25		16122901731
736	16010400486																									23		16122901734
737	15010700115																									25		16010400555
738	14080500043																									40		15060100975
739	16010401799	2016-01-04 10:36:07	3	0	0	0	0	0		0	0	0	0	0	0	0		0	0	0		0				43	1	16122902477	2016-12-29 13:47:00	2	0	0	0	0	0	0	0	0	0	0	0	0	0	0	0	0	0	0	0
740	14080800029																									28		15041200374
741	14081100136																									37		15082000043
742	14081100139																									36		16070100185
743	14081100140																									45		15082000049
744	14081100146																									45		15082000048
745	14081100179																									45		15082000108
746	14081100192																									36		15082000120
747	14081100200																									37		15082000127
748	14081100225																									29		15082000161
749	14081100363																									39		15082000306
750	14081100370																									28		15082000342
751	14081100647																									50		15082000630
752	14081100649																									35		15082000632
753	14081100650																									50		15082000629
754	14081100651																									37		16070100734
755	14081100652																									52		15082000634
756	14081100655																									31		15082000636
757	14081100657																									50		15082000640
758	14081100658																									24		15082000637
759	14081100659																									50		15082000641
760	14081100662																									36		15082000643
761	14081100663																									46		15082000644
762	14081100664																									32		15082000645
763	14081100686																									29		15082000671
764	14081100729																									27		15082000714
765	17080300081	2017-08-03 09:27:57	1	1	0	0	0	0	0	0	0	0	0	0	1	0	0	0	0	0	0	0	0	0	0	35	1
766	15041200031																									30		16031000049	2016-03-10 15:59:20	3	0	0	0	0	0		0	0	0	0	0	0	0		0	0	0		0
767	15040900616																									51		16031100395	2016-03-11 15:34:02	3	0	0	0	0	0		0	0	0	0	0	0	0		0	0	0		0
768	15041200033																									28		16031000051
769	15041200582																									39		16031000234	2016-03-10 15:59:28	3	0	0	0	0	0		0	0	0	0	0	0	0		0	0	0		0
770	15041200644																									50		16031000310	2016-03-10 15:59:32	3	0	0	0	0	0		0	0	0	0	0	0	0		0	0	0		0
771	15041200632																									44		16031000249	2016-03-10 15:59:29	3	0	0	0	0	0		0	0	0	0	0	0	0		0	0	0		0
772	15041200634																									30		16031000252	2016-03-10 15:59:29	3	0	0	0	0	0		0	0	0	0	0	0	0		0	0	0		0
773	15041200633																									41		16031000307	2016-03-10 15:59:32	3	0	0	0	0	0		0	0	0	0	0	0	0		0	0	0		0
774	15041200673																									55		16031101745	2016-03-11 15:34:55	3	0	0	0	0	0		0	0	0	0	0	0	0		0	0	0		0
775	15041200629																									39		16031000250	2016-03-10 15:59:29	2	1	0	0	1	0	0	0	0	0	0	0	0	0	0	0	0	0	0	0
776	15041200635																									35		16031000230	2016-03-10 15:59:28	3	0	0	0	0	0		0	0	0	0	0	0	0		0	0	0		0
777	15041200631																									31		16031000248	2016-03-10 15:59:29	3	0	0	0	0	0		0	0	0	0	0	0	0		0	0	0		0
778	16031000256	2016-03-10 15:59:29	3	0	0	0	0	0		0	0	0	0	0	0	0		0	0	0		0				36	1	17022700803	2017-02-27 16:23:18	1	0	0	0	0	0	0	0	0	0	0	0	0	0	0	0	0	0	0	0
779	15041200640																									32		16031000254	2016-03-10 15:59:29	3	0	0	0	0	0		0	0	0	0	0	0	0		0	0	0		0
780	15041200600																									31		18030900383	2018-03-09 11:09:38	1	0	0	0	0	0	0	0	0	0	0	0	0	0	0	0	0	0	0	0
781	15041200606																									29		16031000262
782	15041200609																									28		17022800818	2017-02-28 14:53:07	2	0	0	0	0	0	0	0	0	0	0	0	0	0	0	0	0	0	0	0
783	15041200607																									29		17022800826	2017-02-28 14:53:08	2	0	0	0	0	0	0	0	0	0	0	0	0	0	0	0	0	0	0	0
784	15041200604																									32		16031000260	2016-03-10 15:59:29	2	1	0	0	0	0	0	0	0	0	0	0	0	1	0	0	0	0	0	0
785	15041200598																									29		16031000304	2016-03-10 15:59:31	3	0	0	0	0	0		0	0	0	0	0	0	0		0	0	0		0
786	16031000266	2016-03-10 15:59:30	3	0	0	0	0	0		0	0	0	0	0	0	0		0	0	0		0				31	1	17022800820	2017-02-28 14:53:07	2	0	0	0	0	0	0	0	0	0	0	0	0	0	0	0	0	0	0	0
787	15041200616																									31		16031000273	2016-03-10 15:59:30	3	0	0	0	0	0		0	0	0	0	0	0	0		0	0	0		0
788	15041200615																									34		16031000071	2016-03-10 15:59:21	3	0	0	0	0	0		0	0	0	0	0	0	0		0	0	0		0
789	15041200617																									29		17022800827	2017-02-28 14:53:08	2	0	0	0	0	0	0	0	0	0	0	0	0	0	0	0	0	0	0	0
790	15041200627																									45		16031000144	2016-03-10 15:59:24	3	0	0	0	0	0		0	0	0	0	0	0	0		0	0	0		0
791	15041200621																									33		16031000280	2016-03-10 15:59:30	3	0	0	0	0	0		0	0	0	0	0	0	0		0	0	0		0
792	16031000285	2016-03-10 15:59:31	3	0	0	0	0	0		0	0	0	0	0	0	0		0	0	0		0				32	1	17022800839	2017-02-28 14:53:08	2	0	0	0	0	0	0	0	0	0	0	0	0	0	0	0	0	0	0	0
793	15041200589																									31		16031000241
794	15041200175																									37		16031100538	2016-03-11 15:34:07	3	0	0	0	0	0		0	0	0	0	0	0	0		0	0	0		0
795	15041200232																									30		16031100640
796	15041200226																									29		16031100635
797	15040900506																									35		16031100679	2016-03-11 15:34:13	3	0	0	0	0	0		0	0	0	0	0	0	0		0	0	0		0
798	15041200268																									42		16031100717	2016-03-11 15:34:15	3	0	0	0	0	0		0	0	0	0	0	0	0		0	0	0		0
799	16031000112	2016-03-10 15:59:23	2	1	0	0	1	0	0	0	0	0	0	0	0	0	0	0	0	0	0	0	0	0	0	29	1	17022700659	2017-02-27 16:23:12	2	1	0	0	0	1	0	0	0	0	0	0	0	0	0	0	0	0	0	0
800	15041200307																									29		16031100855	2016-03-11 15:34:20	3	0	0	0	0	0		0	0	0	0	0	0	0		0	0	0		0
801	15041200327																									30		16031100845	2016-03-11 15:34:20	3	0	0	0	0	0		0	0	0	0	0	0	0		0	0	0		0
802	15041200431																									30		16031101010
803	15041200498																									36		16031100375
804	15041200499																									29		17022800597	2017-02-28 14:52:57	2	0	0	0	0	0	0	0	0	0	0	0	0	0	0	0	0	0	0	0
805	15041200500																									30		16031000157	2016-03-10 15:59:25	3	0	0	0	0	0		0	0	0	0	0	0	0		0	0	0		0
806	15041200493																									41		16031000152	2016-03-10 15:59:25	3	0	0	0	0	0		0	0	0	0	0	0	0		0	0	0		0
807	15041200506																									39		16031000164	2016-03-10 15:59:25	3	0	0	0	0	0		0	0	0	0	0	0	0		0	0	0		0
808	15041200529																									39		16031000187	2016-03-10 15:59:26	3	0	0	0	0	0		0	0	0	0	0	0	0		0	0	0		0
809	15041200507																									42		16031000165	2016-03-10 15:59:25	3	0	0	0	0	0		0	0	0	0	0	0	0		0	0	0		0
810	15041200508																									39		16031000166	2016-03-10 15:59:25	3	0	0	0	0	0		0	0	0	0	0	0	0		0	0	0		0
811	15041200528																									36		16031000186	2016-03-10 15:59:26	3	0	0	0	0	0		0	0	0	0	0	0	0		0	0	0		0
812	15041200462																									56		16031101729	2016-03-11 15:34:54	2	1	0	0	0	0	0	0	0	0	0	0	0	0	0	0	1	0	0	0
813	15041200549																									32		16031000205	2016-03-10 15:59:27	3	0	0	0	0	0		0	0	0	0	0	0	0		0	0	0		0
814	15041200509																									32		16031000167	2016-03-10 15:59:25	3	0	0	0	0	0		0	0	0	0	0	0	0		0	0	0		0
815	15041200516																									36		16031000175	2016-03-10 15:59:26	3	0	0	0	0	0		0	0	0	0	0	0	0		0	0	0		0
816	15041200517																									33		16031000176	2016-03-10 15:59:26	3	0	0	0	0	0		0	0	0	0	0	0	0		0	0	0		0
817	15041200518																									34		16031000177
818	15041200519																									33		16031000178
819	15041200520																									32		16031000179	2016-03-10 15:59:26	3	0	0	0	0	0		0	0	0	0	0	0	0		0	0	0		0
820	15041200556																									27		16031000211	2016-03-10 15:59:27	3	0	0	0	0	0		0	0	0	0	0	0	0		0	0	0		0
821	15041200555																									36		16031000210	2016-03-10 15:59:27	3	0	0	0	0	0		0	0	0	0	0	0	0		0	0	0		0
822	16031000188	2016-03-10 15:59:26	3	0	0	0	0	0		0	0	0	0	0	0	0		0	0	0		0				31	1	18030900280	2018-03-09 11:09:33	1	0	0	0	0	0	0	0	0	0	0	0	0	0	0	0	0	0	0	0
823	15041200554																									34		16031000209	2016-03-10 15:59:27	3	0	0	0	0	0		0	0	0	0	0	0	0		0	0	0		0
824	15041200532																									27		16031000189	2016-03-10 15:59:26	3	0	0	0	0	0		0	0	0	0	0	0	0		0	0	0		0
825	15041200560																									28		16031000214
826	15041200533																									34		16031000190	2016-03-10 15:59:26	3	0	0	0	0	0		0	0	0	0	0	0	0		0	0	0		0
827	15041200536																									28		16031000194
828	15041200540																									30		16031000198	2016-03-10 15:59:27	3	0	0	0	0	0		0	0	0	0	0	0	0		0	0	0		0
829	15041200538																									31		16031000196	2016-03-10 15:59:27	3	0	0	0	0	0		0	0	0	0	0	0	0		0	0	0		0
830	15041200524																									27		16031000182
831	15041200511																									40		16031000169	2016-03-10 15:59:25	3	0	0	0	0	0		0	0	0	0	0	0	0		0	0	0		0
832	15041200539																									42		16031000197	2016-03-10 15:59:27	3	0	0	0	0	0		0	0	0	0	0	0	0		0	0	0		0
833	15041200522																									29		16031000181
834	15041200514																									26		16031000172
835	15041200547																									30		16031000203
836	15041200548																									27		16031000204
837	15041200494																									34		16031000154	2016-03-10 15:59:25	3	0	0	0	0	0		0	0	0	0	0	0	0		0	0	0		0
838	14081300725																									72		15091100079	2015-09-11 08:30:57	3	0	0	0	0	0		0	0	0	0	0	0	0		0	0	0		0
839	14081300728																									81		15090800054	2015-09-08 08:08:20	3	0	0	0	0	0		0	0	0	0	0	0	0		0	0	0		0
840	14081300741																									70		15091100024	2015-09-11 07:48:39	3	0	0	0	0	0		0	0	0	0	0	0	0		0	0	0		0
841	14081300747																									55		15090800064	2015-09-08 08:17:03	3	0	0	0	0	0		0	0	0	0	0	0	0		0	0	0		0
842	14081300749																									74		15090800108	2015-09-08 08:52:05	3	0	0	0	0	0		0	0	0	0	0	0	0		0	0	0		0
843	14081300753																									75		15090800062	2015-09-08 08:16:29	3	0	0	0	0	0		0	0	0	0	0	0	0		0	0	0		0
844	14081300756																									57		15090900084	2015-09-09 08:46:44	3	0	0	0	0	0		0	0	0	0	0	0	0		0	0	0		0
845	14081300764																									73		15102700030	2015-10-27 08:23:32	3	0	0	0	0	0		0	0	0	0	0	0	0		0	0	0		0
846	14081300842																									78		15100800001	2015-10-08 07:33:00	3	0	0	0	0	0		0	0	0	0	0	0	0		0	0	0		0
847	15091000045	2015-09-10 08:00:10	3	0	0	0	0	0		0	0	0	0	0	0	0		0	0	0		0				63	1	16090900091	2016-09-09 08:25:46	3	0	0	0	0	0		0	0	0	0	0	0	0		0	0	0		0
848	14081300847																									58		15012100044	2015-01-21 15:37:39	3	0	0	0	0	0		0	0	0	0	0	0	0		0	0	0		0
849	14081300848																									62		15101600591	2015-10-16 16:48:35	3	0	0	0	0	0		0	0	0	0	0	0	0		0	0	0		0
850	14081300853																									55		15091000049	2015-09-10 08:44:10	3	0	0	0	0	0		0	0	0	0	0	0	0		0	0	0		0
851	14081300856																									78		15091000104	2015-09-10 08:37:32	3	0	0	0	0	0		0	0	0	0	0	0	0		0	0	0		0
852	14081300860																									80		15093000010	2015-09-30 07:33:22	3	0	0	0	0	0		0	0	0	0	0	0	0		0	0	0		0
853	14081300897																									55		15090800065	2015-09-08 08:17:44	3	0	0	0	0	0		0	0	0	0	0	0	0		0	0	0		0
854	14081300901																									54		15090800100	2015-09-08 08:42:16	3	0	0	0	0	0		0	0	0	0	0	0	0		0	0	0		0
855	14081300903																									54		15091000100	2015-09-10 08:33:58	3	0	0	0	0	0		0	0	0	0	0	0	0		0	0	0		0
856	14081300910																									77		15091000008	2015-09-10 07:38:52	3	0	0	0	0	0		0	0	0	0	0	0	0		0	0	0		0
857	14081300915																									63		15091500029	2015-09-15 08:31:40	3	0	0	0	0	0		0	0	0	0	0	0	0		0	0	0		0
858	14081300945																									52		15090700084	2015-09-07 09:15:53	3	0	0	0	0	0		0	0	0	0	0	0	0		0	0	0		0
859	14081300946																									55		15090800095	2015-09-08 08:38:51	3	0	0	0	0	0		0	0	0	0	0	0	0		0	0	0		0
860	14081300948																									63		15090800041	2015-09-08 07:56:33	3	0	0	0	0	0		0	0	0	0	0	0	0		0	0	0		0
861	14081300955																									51		15090900057
862	14081300962																									49		15090900053	2015-09-09 08:19:06	3	0	0	0	0	0		0	0	0	0	0	0	0		0	0	0		0
863	14081300970																									53		15091700005	2015-09-17 07:44:17	3	0	0	0	0	0		0	0	0	0	0	0	0		0	0	0		0
864	14081300989																									53		15091000102	2015-09-10 08:35:07	2	1	0	0	0	0	0	1	0	0	0	0	0	0	0	0	0	0	0	0
865	14081301004																									79		15093000008	2015-09-30 07:31:33	3	0	0	0	0	0		0	0	0	0	0	0	0		0	0	0		0
866	14081301018																									80		15091000047
867	14081301029																									77		15093000011	2015-09-30 07:34:06	3	0	0	0	0	0		0	0	0	0	0	0	0		0	0	0		0
868	14081301037																									56		15100900002	2015-10-09 07:35:39	3	0	0	0	0	0		0	0	0	0	0	0	0		0	0	0		0
869	14081301045																									76		14123002160
870	14081301047																									65		15093000034	2015-09-30 08:26:01	3	0	0	0	0	0		0	0	0	0	0	0	0		0	0	0		0
871	14081301049																									79		15092900028	2015-09-29 08:29:22	3	0	0	0	0	0		0	0	0	0	0	0	0		0	0	0		0
872	14081301051																									77		15052600004
873	14081301056																									53		15091100091	2015-09-11 08:39:43	3	0	0	0	0	0		0	0	0	0	0	0	0		0	0	0		0
874	14081301057																									54		15101500014	2015-10-15 08:16:01	3	0	0	0	0	0		0	0	0	0	0	0	0		0	0	0		0
875	14081301085																									72		15090900026	2015-09-09 07:52:08	3	0	0	0	0	0		0	0	0	0	0	0	0		0	0	0		0
876	14081301104																									61		15091100108	2015-09-11 09:23:18	3	0	0	0	0	0		0	0	0	0	0	0	0		0	0	0		0
877	14081301128																									53		16090800038	2016-09-08 07:52:32	3	0	0	0	0	0		0	0	0	0	0	0	0		0	0	0		0
878	14081301142																									54		16090600082	2016-09-06 08:39:18	3	0	0	0	0	0		0	0	0	0	0	0	0		0	0	0		0
879	14081301157																									51		15120300062	2015-12-03 14:40:00	2	1	0	0	1	0	0	0	0	0	0	0	0	0	0	0	0	0	0	0
880	14081301162																									76		15091100019	2015-09-11 07:45:29	3	0	0	0	0	0		0	0	0	0	0	0	0		0	0	0		0
881	14081301166																									78		15093000016	2015-09-30 07:37:23	3	0	0	0	0	0		0	0	0	0	0	0	0		0	0	0		0
882	14081301172																									65		15093000028	2015-09-30 07:58:08	3	0	0	0	0	0		0	0	0	0	0	0	0		0	0	0		0
883	14081301173																									63		14123001903
884	14081301180																									68		15093000026	2015-09-30 07:51:30	3	0	0	0	0	0		0	0	0	0	0	0	0		0	0	0		0
885	14081301182																									56		15090800071	2015-09-08 08:21:39	3	0	0	0	0	0		0	0	0	0	0	0	0		0	0	0		0
886	14081301194																									49		16090600050	2016-09-06 08:07:56	3	0	0	0	0	0		0	0	0	0	0	0	0		0	0	0		0
887	14081301195																									59		15091100063	2015-09-11 08:16:25	3	0	0	0	0	0		0	0	0	0	0	0	0		0	0	0		0
888	14081301196																									80		15090800034	2015-09-08 07:53:24	3	0	0	0	0	0		0	0	0	0	0	0	0		0	0	0		0
889	14081301197																									44		15090900039	2015-09-09 08:03:08	3	0	0	0	0	0		0	0	0	0	0	0	0		0	0	0		0
890	14081301198																									75		15102000011	2015-10-20 07:51:34	3	0	0	0	0	0		0	0	0	0	0	0	0		0	0	0		0
891	14081301201																									47		15090800025	2015-09-08 07:47:18	3	0	0	0	0	0		0	0	0	0	0	0	0		0	0	0		0
892	14081301205																									55		15090800096	2015-09-08 08:39:57	3	0	0	0	0	0		0	0	0	0	0	0	0		0	0	0		0
893	14081301214																									83		15091000042
894	14081301215																									45		15101900008	2015-10-19 08:25:42	3	0	0	0	0	0		0	0	0	0	0	0	0		0	0	0		0
895	14081301218																									54		15090900062	2015-09-09 08:24:19	3	0	0	0	0	0		0	0	0	0	0	0	0		0	0	0		0
896	14081301240																									57		15101900053	2015-10-19 10:26:54	3	0	0	0	0	0		0	0	0	0	0	0	0		0	0	0		0
897	14081301249																									48		15100800027	2015-10-08 08:50:37	3	0	0	0	0	0		0	0	0	0	0	0	0		0	0	0		0
898	14081301250																									63		15093000025	2015-09-30 07:50:20	3	0	0	0	0	0		0	0	0	0	0	0	0		0	0	0		0
899	14081301252																									67		15093000039	2015-09-30 08:47:48	3	0	0	0	0	0		0	0	0	0	0	0	0		0	0	0		0
900	14081301254																									55		15010700043	2015-01-07 08:06:02	3	0	0	0	0	0		0	0	0	0	0	0	0		0	0	0		0
901	14081301268																									46		15091000110
902	14081301271																									79		15091100054	2015-09-11 08:07:42	3	0	0	0	0	0		0	0	0	0	0	0	0		0	0	0		0
903	14081301282																									59		15090800078	2015-09-08 08:26:55	3	0	0	0	0	0		0	0	0	0	0	0	0		0	0	0		0
904	14081301294																									45		15090800032	2015-09-08 07:52:06	3	0	0	0	0	0		0	0	0	0	0	0	0		0	0	0		0
905	14081301306																									50		15090900076	2015-09-09 08:39:08	3	0	0	0	0	0		0	0	0	0	0	0	0		0	0	0		0
906	14081301310																									66		15093000022	2015-09-30 07:44:33	3	0	0	0	0	0		0	0	0	0	0	0	0		0	0	0		0
907	14081301313																									47		15092900934	2015-09-29 13:45:10	3	0	0	0	0	0		0	0	0	0	0	0	0		0	0	0		0
908	14081301314																									44		15102000604	2015-10-20 11:09:55	3	0	0	0	0	0		0	0	0	0	0	0	0		0	0	0		0
909	14081301325																									55		15090800070	2015-09-08 08:20:38	3	0	0	0	0	0		0	0	0	0	0	0	0		0	0	0		0
910	14081301327																									52		15090700065	2015-09-07 08:41:00	3	0	0	0	0	0		0	0	0	0	0	0	0		0	0	0		0
911	14081301329																									61		15090800053	2015-09-08 08:07:51	3	0	0	0	0	0		0	0	0	0	0	0	0		0	0	0		0
912	14081301330																									42		15091100104	2015-09-11 09:10:16	3	0	0	0	0	0		0	0	0	0	0	0	0		0	0	0		0
913	14081301332																									47		15090800112	2015-09-08 08:59:45	3	0	0	0	0	0		0	0	0	0	0	0	0		0	0	0		0
914	14081301345																									46		15091100089	2015-09-11 08:37:33	2	1	0	0	0	0	0	0	0	0	0	0	1	0	0	0	0	0	0	0
915	14081301347																									51		16090600044	2016-09-06 08:03:34	3	0	0	0	0	0		0	0	0	0	0	0	0		0	0	0		0
916	14081301355																									50		15090700073	2015-09-07 08:57:17	3	0	0	0	0	0		0	0	0	0	0	0	0		0	0	0		0
917	14081301361																									49		16090900115	2016-09-09 08:46:11	2	1	0	0	0	0	0	0	0	0	0	0	0	0	0	0	1	0	0	0
918	14081301367																									45		15091000099	2015-09-10 08:33:16	3	0	0	0	0	0		0	0	0	0	0	0	0		0	0	0		0
919	14081301370																									53		15090800110	2015-09-08 08:55:46	3	0	0	0	0	0		0	0	0	0	0	0	0		0	0	0		0
920	14081301372																									51		15090700029	2015-09-07 07:57:31	3	0	0	0	0	0		0	0	0	0	0	0	0		0	0	0		0
921	14081301374																									50		15091000024	2015-09-10 07:46:31	3	0	0	0	0	0		0	0	0	0	0	0	0		0	0	0		0
922	14081301380																									60		15100900179	2015-10-09 16:17:47	3	0	0	0	0	0		0	0	0	0	0	0	0		0	0	0		0
923	14081301386																									58		15100800030	2015-10-08 09:01:31	2	1	0	0	0	0	0	0	0	0	1	0	0	0	0	0	0	0	0	0
924	14081301389																									48		14101400016
925	14081301394																									50		15101900057	2015-10-19 10:31:31	3	0	0	0	0	0		0	0	0	0	0	0	0		0	0	0		0
926	14081301397																									48		15090900038	2015-09-09 08:02:22	3	0	0	0	0	0		0	0	0	0	0	0	0		0	0	0		0
927	14081301398																									51		15101900055	2015-10-19 10:29:18	3	0	0	0	0	0		0	0	0	0	0	0	0		0	0	0		0
928	15010700098																									27		16010400734
929	15092300973																									39		17092700697	2017-09-27 15:58:48	1	0	0	0	0	0	0	0	0	0	0	0	0	0	0	0	0	0	0	0
930	16091900611																									37		17092701126	2017-09-27 15:59:07	1	0	0	0	0	0	0	0	0	0	0	0	0	0	0	0	0	0	0	0
931	15110500064																									32		16091900609
932	16092300209																									36		17092700534	2017-09-27 15:08:05	1	0	0	0	0	0	0	0	0	0	0	0	0	0	0	0	0	0	0	0
933	15110500092																									38		16092300222
934	15110500093																									46		16092300223
935	15110500097																									50		16092300227
936	15092301191																									55		16091900614
937	15110500068																									52		16091900620
938	15110500065																									34		16091900610
939	15110500101																									32		17092700542	2017-09-27 15:08:05	1	1	0	0	0	0	0	0	0	0	0	1	0	0	0	0	0	0	0	0
940	15110500159																									31		16091900762
941	15110500161																									45		16092300174
942	15110500162																									43		16092300173
943	15110500166																									44		16092300146
944	15110500168																									43		16092300147
945	15110500171																									45		16092300157
946	15110500172																									53		16092300156
947	15110500176																									37		16092300150
948	15110500178																									45		16092300149
949	15110500179																									38		16092300184
950	15110500180																									40		16092300175
951	15021700507	2015-02-17 10:35:52	2	1	0	0	0	0	0	0	0	0	0	0	0	0	0	0	0	0	0	1	0	0	0	58	1	15110500185
952	15110500188																									33		16092300219
953	15110500194																									42		16092300191
954	15110500197																									41		16092300176
955	15110500206																									39		16092300177
956	15110500207																									38		16092300160
957	15110500209																									46		16092300195
958	15110500228																									31		16091900773
959	15092300012																									55		16091900134
960	15092301154																									53		16091901257
961	15110500090																									49		16092300238
962	15110500105																									34		17092700547	2017-09-27 15:08:05	1	0	0	0	0	0	0	0	0	0	0	0	0	0	0	0	0	0	0	0
963	15110500109																									34		16091900636
964	15092301140																									51		16091900678
965	15110500120																									50		16092300113
966	15110500124																									46		16092300104
967	15092301159																									53		16091901258
968	15110500126																									41		16092300105
969	15110500138																									37		16092300107
970	15110500139																									32		16092300110
971	15110500142																									38		16092300112
972	15110500145																									33		16092300111
973	15110500222																									26		17092700507	2017-09-27 15:08:03	1	0	0	0	0	0	0	0	0	0	0	0	0	0	0	0	0	0	0	0
974	15110500224																									28		16092300120
975	15110500071																									50		16091900625
976	15110500075																									54		16092300244
977	15110500072																									42		16091900623
978	15110500073																									33		16091900624
979	15110500210																									36		16091900774
980	15110500218																									50		16092300251
981	15110500220																									46		16092300252
982	15092301172																									54		16091901252
983	15092301097																									45		16091900663
984	15092301195																									58		16091901259
985	15092301149																									52		17092701163	2017-09-27 15:59:09	1	1	0	0	0	0	0	0	1	0	0	0	0	0	0	0	0	0	0	0
986	15092301177																									55		16091901243
987	15092301181																									55		16091901248
988	15092301026																									33		16092300265
989	14123001591	2014-12-30 09:35:07	3	0	0	0	0	0		0	0	0	0	0	0	0		0	0	0		0				43	1	16010401770	2016-01-04 10:36:06	3	0	0	0	0	0		0	0	0	0	0	0	0		0	0	0		0
990	14123001534	2014-12-30 09:35:03	2	1	0	0	0	0	0	0	0	0	0	0	0	1	0	0	0	0	0	1	0	0	0	40	1	16010401700	2016-01-04 10:36:03	2	1	0	0	0	0	0	0	0	0	0	0	0	1	0	0	0	0	0	0
991	15010600008	2015-01-06 08:07:47	3	0	0	0	0	0		0	0	0	0	0	0	0		0	0	0		0				39	1	16010401676	2016-01-04 10:36:02	3	0	0	0	0	0		0	0	0	0	0	0	0		0	0	0		0
992	14081900004																									45		15042900482	2015-04-29 15:47:51	3	0	0	0	0	0		0	0	0	0	0	0	0		0	0	0		0
993	15082000886	2015-08-20 14:44:00	3	0	0	0	0	0		0	0	0	0	0	0	0		0	0	0		0				35	1
994	14081900116																									35		15082000863	2015-08-20 14:43:59	3	0	0	0	0	0		0	0	0	0	0	0	0		0	0	0		0
995	15082000843	2015-08-20 14:43:58	3	0	0	0	0	0		0	0	0	0	0	0	0		0	0	0		0				35	1	16081600098	2016-08-16 13:59:11	3	0	0	0	0	0		0	0	0	0	0	0	0		0	0	0		0
996	14081900124																									50		15082000893	2015-08-20 14:44:00	3	0	0	0	0	0		0	0	0	0	0	0	0		0	0	0		0
997	14081900126																									40		15082000885	2015-08-20 14:44:00	3	0	0	0	0	0		0	0	0	0	0	0	0		0	0	0		0
998	15042900577	2015-04-29 15:47:55	2	1	0	0	0	0	0	0	0	0	0	0	0	1	0	0	0	0	0	0	0	0	0	68	1	16051000614	2016-05-10 15:08:25	2	1	0	0	0	0	0	0	0	0	0	0	0	1	0	0	0	0	0	0
999	14081900152																									35		15082000887	2015-08-20 14:44:00	3	0	0	0	0	0		0	0	0	0	0	0	0		0	0	0		0
1000	14081900157																									39		15082000826	2015-08-20 14:43:58	2	1	0	0	0	0	0	0	0	0	0	0	0	0	0	0	1	0	0	0
1001	14081900159																									38		15082000838	2015-08-20 14:43:58	3	0	0	0	0	0		0	0	0	0	0	0	0		0	0	0		0
1002	14081900170																									38		15092300966
1003	14081900189																									36		16081600106	2016-08-16 13:59:12	3	0	0	0	0	0		0	0	0	0	0	0	0		0	0	0		0
1004	14081900190																									32		15082000934
1005	15082000874																									27		16081600092	2016-08-16 13:59:11	3	0	0	0	0	0		0	0	0	0	0	0	0		0	0	0		0
1006	14081900197																									31		15091700052
1007	15112600043	2015-11-26 09:50:14	3	0	0	0	0	0		0	0	0	0	0	0	0		0	0	0		0				34	1
1008	14082000052																									34		15102300019	2015-10-23 08:02:13	3	0	0	0	0	0		0	0	0	0	0	0	0		0	0	0		0
1009	14082100272																									44		15091500705
1010	17091500152	2017-09-15 10:55:34	1	0	0	0	0	0	0	0	0	0	0	0	0	0	0	0	0	0	0	0	0	0	0	36	1
1011	14082200008																									65		15090700027	2015-09-07 07:57:01	3	0	0	0	0	0		0	0	0	0	0	0	0		0	0	0		0
1012	14082200037																									47		15060101163
1013	14082200069																									50		15092900840	2015-09-29 11:16:52	3	0	0	0	0	0		0	0	0	0	0	0	0		0	0	0		0
1014	14082200072																									52		15092900794	2015-09-29 11:16:50	3	0	0	0	0	0		0	0	0	0	0	0	0		0	0	0		0
1015	14082200074																									42		15092900811	2015-09-29 11:16:51	3	0	0	0	0	0		0	0	0	0	0	0	0		0	0	0		0
1016	14082200084																									45		15092900809	2015-09-29 11:16:51	3	0	0	0	0	0		0	0	0	0	0	0	0		0	0	0		0
1017	14082200112																									40		15092900829	2015-09-29 11:16:52	3	0	0	0	0	0		0	0	0	0	0	0	0		0	0	0		0
1018	14082200124																									48		15092900915	2015-09-29 11:16:55	3	0	0	0	0	0		0	0	0	0	0	0	0		0	0	0		0
1019	14082200126																									35		15092900817
1020	14082200134																									41		15092900802	2015-09-29 11:16:51	3	0	0	0	0	0		0	0	0	0	0	0	0		0	0	0		0
1021	14082200137																									40		15092900830	2015-09-29 11:16:52	3	0	0	0	0	0		0	0	0	0	0	0	0		0	0	0		0
1022	14082200139																									56		15092900792	2015-09-29 11:16:50	3	0	0	0	0	0		0	0	0	0	0	0	0		0	0	0		0
1023	14082200144																									55		15092900827	2015-09-29 11:16:51	3	0	0	0	0	0		0	0	0	0	0	0	0		0	0	0		0
1024	14082200146																									56		15092900807
1025	14082200153																									49		15092900808	2015-09-29 11:16:51	3	0	0	0	0	0		0	0	0	0	0	0	0		0	0	0		0
1026	14082200169																									46		15092900786	2015-09-29 11:16:50	3	0	0	0	0	0		0	0	0	0	0	0	0		0	0	0		0
1027	14082200175																									53		15092900088
1028	14082200186																									45		15092900857	2015-09-29 11:16:53	3	0	0	0	0	0		0	0	0	0	0	0	0		0	0	0		0
1029	14082200192																									41		15092900873	2015-09-29 11:16:53	3	0	0	0	0	0		0	0	0	0	0	0	0		0	0	0		0
1030	14082200218																									53		15092900793	2015-09-29 11:16:50	3	0	0	0	0	0		0	0	0	0	0	0	0		0	0	0		0
1031	14082200220																									41		17090700473	2017-09-07 09:07:58	1	0	0	0	0	0	0	0	0	0	0	0	0	0	0	0	0	0	0	0
1032	14082200271																									38		15092900918	2015-09-29 11:16:55	3	0	0	0	0	0		0	0	0	0	0	0	0		0	0	0		0
1033	14082200294																									46		15092900663
1034	14082200301																									50		15092900805	2015-09-29 11:16:51	3	0	0	0	0	0		0	0	0	0	0	0	0		0	0	0		0
1035	14082200333																									60		15083100469	2015-08-31 10:05:25	3	0	0	0	0	0		0	0	0	0	0	0	0		0	0	0		0
1036	14082200349																									54		16102900223
1037	14082200386																									55		15092900898	2015-09-29 11:16:54	3	0	0	0	0	0		0	0	0	0	0	0	0		0	0	0		0
1038	14082200402																									47		15092900138
1039	14082200405																									53		15110300059	2015-11-03 11:01:55	3	0	0	0	0	0		0	0	0	0	0	0	0		0	0	0		0
1040	14082200410																									50		15092900900	2015-09-29 11:16:54	3	0	0	0	0	0		0	0	0	0	0	0	0		0	0	0		0
1041	15092900907	2015-09-29 11:16:55	3	0	0	0	0	0		0	0	0	0	0	0	0		0	0	0		0				46	1
1042	14082200428																									55		15092900769	2015-09-29 11:16:49	3	0	0	0	0	0		0	0	0	0	0	0	0		0	0	0		0
1043	14082200443																									36		16102900459
1044	14082200446																									45		15092900916	2015-09-29 11:16:55	3	0	0	0	0	0		0	0	0	0	0	0	0		0	0	0		0
1045	14082200453																									38		15092900800	2015-09-29 11:16:51	3	0	0	0	0	0		0	0	0	0	0	0	0		0	0	0		0
1046	14082200456																									46		15092900076
1047	14082200465																									39		15082800038	2015-08-28 08:43:25	3	0	0	0	0	0		0	0	0	0	0	0	0		0	0	0		0
1048	14082200474																									54		15092900841	2015-09-29 11:16:52	3	0	0	0	0	0		0	0	0	0	0	0	0		0	0	0		0
1049	14082200490																									30		15090700070
1050	14082200503																									43		15092900781	2015-09-29 11:16:50	3	0	0	0	0	0		0	0	0	0	0	0	0		0	0	0		0
1051	14082200507																									39		15092900831	2015-09-29 11:16:52	3	0	0	0	0	0		0	0	0	0	0	0	0		0	0	0		0
1052	14082200517																									49		15092900855	2015-09-29 11:16:52	3	0	0	0	0	0		0	0	0	0	0	0	0		0	0	0		0
1053	14082200548																									41		16102900058	2016-10-29 09:55:51	3	0	0	0	0	0		0	0	0	0	0	0	0		0	0	0		0
1054	14082200570																									48		15092900902	2015-09-29 11:16:55	2	1	0	0	1	0	0	0	0	0	0	0	0	0	0	0	0	0	0	0
1055	14082200641																									39		15092900212
1056	14082200654																									49		15092900795	2015-09-29 11:16:50	3	0	0	0	0	0		0	0	0	0	0	0	0		0	0	0		0
1057	14082200747																									45		15092900810	2015-09-29 11:16:51	3	0	0	0	0	0		0	0	0	0	0	0	0		0	0	0		0
1058	14082200774																									46		15092900921	2015-09-29 11:16:55	3	0	0	0	0	0		0	0	0	0	0	0	0		0	0	0		0
1059	14082200789																									51		15092900899	2015-09-29 11:16:54	3	0	0	0	0	0		0	0	0	0	0	0	0		0	0	0		0
1060	15092900283																									36		16102900721
1061	14082200865																									28		16031000219
1062	14082200920																									38		15092900208
1063	14082201026																									48		15092900901	2015-09-29 11:16:54	3	0	0	0	0	0		0	0	0	0	0	0	0		0	0	0		0
1064	14082201030																									53		15092900771	2015-09-29 11:16:49	3	0	0	0	0	0		0	0	0	0	0	0	0		0	0	0		0
1065	14082201031																									47		15092900846	2015-09-29 11:16:52	3	0	0	0	0	0		0	0	0	0	0	0	0		0	0	0		0
1066	14082201044																									49		15090100034	2015-09-01 09:06:11	3	0	0	0	0	0		0	0	0	0	0	0	0		0	0	0		0
1067	14082201050																									44		15092900089
1068	14082500006																									78		15123100530	2015-12-31 14:16:34	3	0	0	0	0	0		0	0	0	0	0	0	0		0	0	0		0
1069	14082500032																									47		15090800082	2015-09-08 08:29:54	3	0	0	0	0	0		0	0	0	0	0	0	0		0	0	0		0
1070	14082500064																									58		15101600016	2015-10-16 08:14:30	3	0	0	0	0	0		0	0	0	0	0	0	0		0	0	0		0
1071	14082600203																									49		14123002516	2014-12-30 09:36:13	3	0	0	0	0	0		0	0	0	0	0	0	0		0	0	0		0
1072	14082800084																									56		15090900113	2015-09-09 09:28:20	3	0	0	0	0	0		0	0	0	0	0	0	0		0	0	0		0
1073	14082800087																									41		15091100088	2015-09-11 08:37:17	3	0	0	0	0	0		0	0	0	0	0	0	0		0	0	0		0
1074	14082800108																									66		16020100009	2016-02-01 08:14:20	3	0	0	0	0	0		0	0	0	0	0	0	0		0	0	0		0
1075	14082900043																									29		15060100425
1076	15110500184																									30		16092300218
1077	14083100056																									36		16102900124	2016-10-29 09:55:54	3	0	0	0	0	0		0	0	0	0	0	0	0		0	0	0		0
1078	15052200028	2015-05-22 09:18:22	3	0	0	0	0	0		0	0	0	0	0	0	0		0	0	0		0				42	1	16060200024	2016-06-02 08:13:28	3	0	0	0	0	0		0	0	0	0	0	0	0		0	0	0		0
1079	14090200019																									44		15032700033
1080	16010401110	2016-01-04 10:35:37	3	0	0	0	0	0		0	0	0	0	0	0	0		0	0	0		0				39	1	16122902250	2016-12-29 13:46:50	2	0	0	0	0	0	0	0	0	0	0	0	0	0	0	0	0	0	0	0
1081	14090200823																									29		15092300992
1082	14090200827																									30		15092301002
1083	14090200829																									30		15092301018
1084	15092301006																									31		16091900468
1085	14090200833																									31		15092301007
1086	14090200834																									31		15092301008
1087	14090200836																									32		15092301011
1088	15092301012																									33		17092700641	2017-09-27 15:58:45	1	0	0	0	0	0	0	0	0	0	0	0	0	0	0	0	0	0	0	0
1089	14090200842																									36		15092301045
1090	14090200847																									31		15092301022
1091	14090200848																									31		15092301021
1092	14090200849																									32		15092301031
1093	14090200850																									32		15092301024
1094	14090200851																									32		16091900170
1095	14090200852																									33		15092301027
1096	14090200855																									33		15092301025
1097	14090200857																									34		15092301034
1098	15092301033																									34		16091900161
1099	16091900700																									34		17092701200	2017-09-27 15:59:11	1	1	0	0	0	0	0	0	0	0	0	0	0	0	0	0	1	0	0	0
1100	14090200861																									34		15092301032
1101	14090200862																									34		15092301035
1102	14090200863																									34		15092301036
1103	14090200866																									35		15092301038
1104	14090200867																									35		15092301040
1105	14090200868																									35		15092301042
1106	14090200869																									35		15092301039
1107	14090200870																									35		16081600077	2016-08-16 13:59:10	3	0	0	0	0	0		0	0	0	0	0	0	0		0	0	0		0
1108	14090200871																									35		15092301041
1109	15092301049																									36		16091900693
1110	14090200874																									36		15092301043
1111	14090200875																									36		15092301044
1112	14090200876																									36		15092301046
1113	14090200877																									37		15092301051
1114	15092301055																									37		16091900166
1115	14090200880																									37		16091900370
1116	14090200881																									37		16091900137
1117	14090200882																									38		17092700675	2017-09-27 15:58:46	1	0	0	0	0	0	0	0	0	0	0	0	0	0	0	0	0	0	0	0
1118	14090200883																									38		15092301057
1119	14090200885																									39		15092301061
1120	14090200886																									39		15092301059
1121	14090200887																									39		15092301060
1122	14090200889																									39		15092301063
1123	14090200890																									39		15092900015
1124	14090200891																									39		15092301064
1125	14090200892																									39		15092301062
1126	14090200894																									40		15092301068
1127	14090200895																									40		15092301066
1128	14090200896																									40		15092301067
1129	14090200897																									40		15092301065
1130	14090200898																									40		15092301076
1131	14090200901																									41		15092301081
1132	14090200904																									41		15092301071
1133	14090200906																									41		15092301069
1134	14090200907																									41		15092301074
1135	15092301072																									41		16091900140
1136	14090200911																									42		15092301077
1137	14090200912																									42		15092301079
1138	14090200913																									42		15092301078
1139	14090200914																									43		15092301082
1140	14090200916																									43		15092301086
1141	14090200917																									43		15092301085
1142	14090200921																									44		15092301088
1143	14090200922																									44		15092301090
1144	14090200926																									45		15092200009
1145	14090200927																									45		15092301101
1146	14090200929																									45		15092301096
1147	14090200931																									46		15092301107
1148	15092301104																									46		16091900303
1149	14090200933																									46		15092301115
1150	14090200934																									46		15092301108
1151	14090200935																									46		15092301105
1152	14090200936																									46		15092301109
1153	14090200937																									47		15092301113
1154	14090200938																									47		16091900072
1155	14090200939																									48		15092301116
1156	14090200941																									49		15092301122
1157	14090200942																									49		15092301124
1158	14090200943																									49		15092301121
1159	14090200944																									50		15092301131
1160	14090200945																									50		15092301147
1161	14090200946																									50		15091600014
1162	14090200947																									50		15092301138
1163	14090200948																									50		15092301125
1164	14090200949																									50		15092301135
1165	14090200950																									50		15092900031
1166	14090200951																									50		15092301132
1167	14090200954																									51		15092301142
1168	14090200955																									51		15092100024
1169	14090200956																									51		15092301145
1170	14090200957																									51		15092400009
1171	14090200960																									52		15092301150
1172	14090200961																									51		15092301153
1173	14090200964																									52		15092301148
1174	14090200965																									53		15091100066
1175	14090200966																									53		15092301161
1176	14090200967																									53		15092301163
1177	14090200968																									53		15092301157
1178	14090200970																									54		15092300003
1179	14090200971																									54		15092900012
1180	14090200972																									54		15092301169
1181	14090200973																									54		15092301166
1182	14090200974																									54		15092301171
1183	14090200975																									54		15091000096
1184	14090200977																									55		15092301179
1185	14090200978																									55		15091000080
1186	14090200979																									55		15092301180
1187	14090200982																									55		15092301182
1188	14090200987																									56		15092301189
1189	14090200988																									56		15092301190
1190	14090200989																									56		15092301184
1191	14090200990																									56		15092301185
1192	14090200993																									57		15092301193
1193	14090200994																									57		15092301194
1194	14090200996																									57		15092301202
1195	14090200997																									58		15092301196
1196	14090200998																									58		15091600012
1197	14090200999																									58		15092301199
1198	14090201000																									58		15092301201
1199	14090201003																									60		15092301206
1200	14090201005																									60		15092301207
1201	14090201006																									60		15092301209
1202	14090201008																									60		15092301204
1203	14090201010																									61		15092301212
1204	14090201011																									61		15092301210
1205	14090201012																									62		15092301216
1206	14090201014																									62		15092301217
1207	14090201015																									62		15092301215
1208	14090201016																									62		15092301219
1209	14090201017																									63		15092301221
1210	14090201021																									63		15092301220
1211	14090201022																									64		15092301226
1212	14090201023																									64		15092301227
1213	14090201024																									63		15092301229
1214	14090201027																									65		15092301230
1215	14090201032																									68		15092301236
1216	14090201034																									69		15092301238
1217	14090201035																									69		15092301240
1218	14090201037																									69		15092301237
1219	14090201038																									70		15092301247
1220	14090201040																									70		15092301245
1221	14090201047																									71		15092301253
1222	14090201048																									71		15092301260
1223	14090201050																									71		15092301261
1224	14090201051																									71		15092301257
1225	14090201054																									71		15092301258
1226	14090201055																									71		15092301251
1227	14090201056																									71		15092301262
1228	14090201057																									71		15092301256
1229	14090201058																									71		15092301252
1230	14090201059																									72		15092301263
1231	14090201063																									72		15092301281
1232	14090201064																									72		15092301270
1233	14090201065																									72		16091900994
1234	14090201066																									72		15092301267
1235	14090201071																									73		15092301273
1236	14090201072																									73		15092301280
1237	14090201077																									74		15092301283
1238	14090201080																									74		15092301291
1239	14090201081																									74		15092301286
1240	14090201083																									74		15092300008
1241	14090201084																									74		15092301289
1242	15092301294																									75		17092701507	2017-09-27 15:59:26	1	0	0	0	0	0	0	0	0	0	0	0	0	0	0	0	0	0	0	0
1243	14090201087																									75		15091500035
1244	14090201088																									75		15092301298
1245	14090201089																									75		15092301299
1246	14090201090																									75		15092301300
1247	14090201092																									75		15092301321
1248	14090201093																									75		15092301302
1249	14090201094																									74		15092301305
1250	14090201095																									75		15092301296
1251	14090201097																									75		15092301292
1252	14090201098																									74		15092301304
1253	15092301313																									76		16091901017
1254	14090201103																									75		15092301320
1255	14090201104																									76		15092301314
1256	14090201106																									76		15092300007
1257	14090201107																									76		15092301319
1258	14090201109																									76		15092301317
1259	14090201111																									76		15092301310
1260	14090201112																									76		15092301312
1261	14090201113																									76		15092301309
1262	14090201116																									76		15092301308
1263	14090201121																									77		15092301324
1264	14090201122																									77		15092301328
1265	14090201124																									77		15092301322
1266	14090201125																									77		15092301326
1267	14090201126																									77		15092301331
1268	14090201127																									77		15092301323
1269	14090201128																									77		15092301332
1270	14090201129																									77		15092301329
1271	14090201130																									77		15092301330
1272	14090201132																									78		15092301340
1273	14090201133																									78		15092301341
1274	14090201134																									78		15092301339
1275	14090201135																									78		15092301351
1276	14090201140																									78		15092301347
1277	14090201143																									78		15092301343
1278	14090201144																									78		15092301349
1279	15092301363																									79		16091900931
1280	14090201146																									79		15092301359
1281	14090201147																									79		15092301361
1282	14090201149																									79		15092301360
1283	14090201155																									79		15092100001
1284	14090201159																									78		15092301366
1285	14090201162																									80		16091900910
1286	14090201163																									80		15092301378
1287	14090201164																									80		15092301376
1288	14090201165																									80		15092301377
1289	14090201167																									80		15092301372
1290	15092301388																									81		17092701386	2017-09-27 15:59:20	1	0	0	0	0	0	0	0	0	0	0	0	0	0	0	0	0	0	0	0
1291	14090201172																									81		15092301390
1292	14090201175																									81		15092301386
1293	14090201180																									81		15092301381
1294	14090201181																									82		15092301392
1295	14090201187																									83		15092301398
1296	14090201189																									83		15092301400
1297	14090201190																									83		15092301399
1298	15011200042	2015-01-12 10:12:57	3	0	0	0	0	0		0	0	0	0	0	0	0		0	0	0		0				37	1	16010401586	2016-01-04 10:35:58	3	0	0	0	0	0		0	0	0	0	0	0	0		0	0	0		0
1299	14090500002																									37		15092900787	2015-09-29 11:16:50	2	1	0	0	1	0	0	0	0	0	0	0	0	0	0	0	0	0	0	0
1300	14090500001																									37		15092900776	2015-09-29 11:16:50	3	0	0	0	0	0		0	0	0	0	0	0	0		0	0	0		0
1301	16081600166	2016-08-16 13:59:16	3	0	0	0	0	0		0	0	0	0	0	0	0		0	0	0		0				61	1	17082400025	2017-08-24 08:19:36	1	0	0	0	0	0	0	0	0	0	0	0	0	0	0	0	0	0	0	0
1302	14091000323																									29		15101600125
1303	15011300022																									26		16010400611	2016-01-04 10:35:15	3	0	0	0	0	0		0	0	0	0	0	0	0		0	0	0		0
1304	14092200003																									72		15090900002	2015-09-09 07:33:33	3	0	0	0	0	0		0	0	0	0	0	0	0		0	0	0		0
1305	14092300018																									32		17062800589
1306	16031600273	2016-03-16 14:38:31	3	0	0	0	0	0		0	0	0	0	0	0	0		0	0	0		0				38	1	17040600133
1307	14092500022																									29		17092701014	2017-09-27 15:59:02	1	1	0	0	1	0	0	0	0	0	0	0	0	0	0	0	0	0	0	0
1308	14092500077																									28		15092301016
1309	14092500055																									29		16091900429
1310	15010700030	2015-01-07 07:49:14	3	0	0	0	0	0		0	0	0	0	0	0	0		0	0	0		0				30	1	16010401218	2016-01-04 10:35:42	3	0	0	0	0	0		0	0	0	0	0	0	0		0	0	0		0
1311	14092500099																									37		15092301052
1312	14092600039																									37		15091700018
1313	14092600057																									29		15092300990
1314	15092300971																									39		16092300258
1315	14092800014																									49		15092301139
1316	14092800037																									63		15092301222
1317	14092800952																									57		15042900535	2015-04-29 15:47:53	3	0	0	0	0	0		0	0	0	0	0	0	0		0	0	0		0
1318	14092802347																									26		15102000897
1319	14092802373																									28		15102000186
1320	14092802385																									28		15102000494
1321	16030300274	2016-03-03 15:31:18	3	0	0	0	0	0		0	0	0	0	0	0	0		0	0	0		0				32	1	17031400362	2017-03-14 15:21:12	2	0	0	0	0	0	0	0	0	0	0	0	0	0	0	0	0	0	0	0
1322	14092802598																									32		17101301223	2017-10-13 14:02:06	1	0	0	0	0	0	0	0	0	0	0	0	0	0	0	0	0	0	0	0
1323	14092802629																									32		15102001352
1324	14092802676																									36		15102001164
1325	14092802715																									38		15102000444
1326	14092802716																									38		15102000326
1327	14092802724																									39		15102000345
1328	14092802729																									40		15102000537
1329	14092802743																									41		15101000033	2015-10-10 08:49:22	3	0	0	0	0	0		0	0	0	0	0	0	0		0	0	0		0
1330	14092802752																									42		15102000162
1331	14092802784																									44		15091000117	2015-09-10 08:49:40	3	0	0	0	0	0		0	0	0	0	0	0	0		0	0	0		0
1332	14092802820																									49		15091000120	2015-09-10 08:52:03	3	0	0	0	0	0		0	0	0	0	0	0	0		0	0	0		0
1333	14092802962																									64		15102002060
1334	14092804361																									35		16102902018
1335	14092804374																									36		15111200724
1336	14092804379																									36		15111200717
1337	14092804401																									39		15101200112
1338	14092804403																									39		15111200739
1339	14092804406																									39		15111200740
1340	14092804407																									39		15111200749
1341	14092804417																									40		16102902007	2016-10-29 16:05:28	3	0	0	0	0	0		0	0	0	0	0	0	0		0	0	0		0
1342	14092804424																									41		15111200757
1343	14092804431																									41		15111200761
1344	15111300177																									42		16102901931
1345	14092804441																									42		15111200768
1346	14092804442																									42		15111200770
1347	14092804443																									42		15090100035	2015-09-01 09:06:11	3	0	0	0	0	0		0	0	0	0	0	0	0		0	0	0		0
1348	14092804444																									42		15111200766
1349	14092804456																									44		15111200790
1350	14092804462																									44		15111200788
1351	14092804468																									45		15111200795
1352	14092804493																									47		15111200804
1353	14092804513																									48		15111200831
1354	14092804532																									50		15111200838
1355	14092804555																									54		15111200856
1356	14092804565																									54		15111200857
1357	14092805066																									31		17050800120	2017-05-08 15:20:44	1	0	0	0	0	0	0	0	0	0	0	0	0	0	0	0	0	0	0	0
1358	14092805333																									33		16062900319
1359	14092805336																									35		16110900543
1360	14092805361	2014-09-28 15:24:41	3	0	0	0	0	0		0	0	0	0	0	0	0		0	0	0		0				44	1	16042101347	2016-04-21 15:34:44	3	0	0	0	0	0		0	0	0	0	0	0	0		0	0	0		0
1361	14092900013																									52		15092301164
1362	14093000030																									30		15092301001
1363	14093000039																									29		14123001148	2014-12-30 09:34:35	3	0	0	0	0	0		0	0	0	0	0	0	0		0	0	0		0
1364	16031600279																									36		17040600139	2017-04-06 15:25:37	1	1	0	0	0	0	0	0	0	0	0	0	0	0	0	0	1	0	0	0
1365	14093000044																									33		15040900495
1366	14093000070																									29		15092300997
1367	14093000065																									31		16051000226
1368	14123000495	2014-12-30 09:33:48	3	0	0	0	0	0		0	0	0	0	0	0	0		0	0	0		0				31	1
1369	14100900076																									50		15102800049
1370	14100900082																									42		15102900008	2015-10-29 07:49:15	3	0	0	0	0	0		0	0	0	0	0	0	0		0	0	0		0
1371	14100900088																									36		15110400019	2015-11-04 08:34:06	3	0	0	0	0	0		0	0	0	0	0	0	0		0	0	0		0
1372	14101000027																									39		15042800078
1373	15011500005	2015-01-15 07:33:56	3	0	0	0	0	0		0	0	0	0	0	0	0		0	0	0		0				29	1	16010401189	2016-01-04 10:35:40	3	0	0	0	0	0		0	0	0	0	0	0	0		0	0	0		0
1374	14123001187	2014-12-30 09:34:37	3	0	0	0	0	0		0	0	0	0	0	0	0		0	0	0		0				31	1	16010401258	2016-01-04 10:35:44	3	0	0	0	0	0		0	0	0	0	0	0	0		0	0	0		0
1375	15012200009	2015-01-22 07:49:45	3	0	0	0	0	0		0	0	0	0	0	0	0		0	0	0		0				55	1
1376	14123001206	2014-12-30 09:34:39	3	0	0	0	0	0		0	0	0	0	0	0	0		0	0	0		0				30	1
1377	14123001138	2014-12-30 09:34:34	2	1	0	0	0	0	0	0	0	0	0	0	0	0	0	0	0	1	0	0	0	0	0	29	1	16010401178	2016-01-04 10:35:40	2	1	0	0	0	0	0	0	0	0	0	0	0	0	0	0	0	1	0	0
1378	14101400087																									66		15123100285	2015-12-31 14:16:25	2	1	0	0	0	0	0	0	0	0	1	0	0	0	0	0	0	0	0	0
1379	15012200038																									30		16122901339	2016-12-29 13:46:12	2	0	0	0	0	0	0	0	0	0	0	0	0	0	0	0	0	0	0	0
1380	14101500010																									48		15011600006	2015-01-16 07:52:30	3	0	0	0	0	0		0	0	0	0	0	0	0		0	0	0		0
1381	14101500056																									45		15092500024	2015-09-25 09:12:54	3	0	0	0	0	0		0	0	0	0	0	0	0		0	0	0		0
1382	14101600074																									79		14123002236	2014-12-30 09:35:54	2	1	0	0	0	0	0	0	0	0	0	0	0	0	0	1	0	0	0	0
1383	14101600076																									52		15011200005	2015-01-12 07:50:29	3	0	0	0	0	0		0	0	0	0	0	0	0		0	0	0		0
1384	14101700009																									56		15093000041	2015-09-30 08:50:06	3	0	0	0	0	0		0	0	0	0	0	0	0		0	0	0		0
1385	14101700087																									55		15101200023	2015-10-12 07:57:06	3	0	0	0	0	0		0	0	0	0	0	0	0		0	0	0		0
1386	14102100010																									44		17030300017	2017-03-03 07:51:04	2	0	0	0	0	0	0	0	0	0	0	0	0	0	0	0	0	0	0	0
1387	14102100011																									26		15102000330
1388	14123000686	2014-12-30 09:34:02	3	0	0	0	0	0		0	0	0	0	0	0	0		0	0	0		0				31	1	16010401253	2016-01-04 10:35:43	3	0	0	0	0	0		0	0	0	0	0	0	0		0	0	0		0
1389	15012000023	2015-01-20 08:19:32	3	0	0	0	0	0		0	0	0	0	0	0	0		0	0	0		0				49	1	16010401933	2016-01-04 10:36:13	3	0	0	0	0	0		0	0	0	0	0	0	0		0	0	0		0
1390	15011400041																									24		16010400545
1391	14102300028																									30		16071800093
1392	14123001636	2014-12-30 09:35:11	3	0	0	0	0	0		0	0	0	0	0	0	0		0	0	0		0				45	1	16010401833	2016-01-04 10:36:08	3	0	0	0	0	0		0	0	0	0	0	0	0		0	0	0		0
1393	14102400004																									36		15102002382	2015-10-20 15:19:42	3	0	0	0	0	0		0	0	0	0	0	0	0		0	0	0		0
1394	14123001375	2014-12-30 09:34:51	3	0	0	0	0	0		0	0	0	0	0	0	0		0	0	0		0				34	1	16010401494	2016-01-04 10:35:54	2	1	0	0	0	0	0	0	0	0	0	1	0	0	0	0	0	0	0	0
1395	14102700001																									30		14123001160	2014-12-30 09:34:36	3	0	0	0	0	0		0	0	0	0	0	0	0		0	0	0		0
1396	14102700026																									60		15123100213	2015-12-31 14:16:22	3	0	0	0	0	0		0	0	0	0	0	0	0		0	0	0		0
1397	14123001220	2014-12-30 09:34:40	3	0	0	0	0	0		0	0	0	0	0	0	0		0	0	0		0				31	1	16010401310	2016-01-04 10:35:46	3	0	0	0	0	0		0	0	0	0	0	0	0		0	0	0		0
1398	15111200825																									49		16111100100
1399	16010401166	2016-01-04 10:35:39	3	0	0	0	0	0		0	0	0	0	0	0	0		0	0	0		0				29	1	16122901975	2016-12-29 13:46:39	2	0	0	0	0	0	0	0	0	0	0	0	0	0	0	0	0	0	0	0
1400	14110300048																									48		15102000048
1401	16030300615	2016-03-03 15:31:32	3	0	0	0	0	0		0	0	0	0	0	0	0		0	0	0		0				33	1	17031400158	2017-03-14 15:21:02	2	0	0	0	0	0	0	0	0	0	0	0	0	0	0	0	0	0	0	0
1402	16081600348	2016-08-16 14:34:14	3	0	0	0	0	0		0	0	0	0	0	0	0		0	0	0		0				28	1
1403	14110500153																									52		15112700207	2015-11-27 11:24:08	2	1	0	0	0	0	0	0	0	0	0	0	0	1	0	0	0	0	0	0
1404	14123001336	2014-12-30 09:34:49	3	0	0	0	0	0		0	0	0	0	0	0	0		0	0	0		0				35	1	16010401454	2016-01-04 10:35:52	2	1	0	0	0	0	0	0	0	0	0	0	1	1	0	0	0	0	0	0
1405	16010401277	2016-01-04 10:35:44	3	0	0	0	0	0		0	0	0	0	0	0	0		0	0	0		0				31	1	16122901453	2016-12-29 13:46:17	2	0	0	0	0	0	0	0	0	0	0	0	0	0	0	0	0	0	0	0
1406	14123001561	2014-12-30 09:35:05	3	0	0	0	0	0		0	0	0	0	0	0	0		0	0	0		0				41	1	16010401734	2016-01-04 10:36:04	3	0	0	0	0	0		0	0	0	0	0	0	0		0	0	0		0
1407	14111300037																									51		15093000029	2015-09-30 07:59:01	3	0	0	0	0	0		0	0	0	0	0	0	0		0	0	0		0
1408	14123001786																									53		16010402032	2016-01-04 10:36:17	3	0	0	0	0	0		0	0	0	0	0	0	0		0	0	0		0
1409	15040100473																									32		16032400209
1410	14111800032																									66		16090600026	2016-09-06 07:52:06	3	0	0	0	0	0		0	0	0	0	0	0	0		0	0	0		0
1411	14111800068																									32		15120700045
1412	16041301071	2016-04-13 13:45:28	3	0	0	0	0	0		0	0	0	0	0	0	0		0	0	0		0				53	1	17032901256	2017-03-29 15:18:06	1	0	0	0	0	0	0	0	0	0	0	0	0	0	0	0	0	0	0	0
1413	14112100016																									31		15092301010
1414	14123001668	2014-12-30 09:35:13	3	0	0	0	0	0		0	0	0	0	0	0	0		0	0	0		0				47	1	16010401872	2016-01-04 10:36:10	3	0	0	0	0	0		0	0	0	0	0	0	0		0	0	0		0
1415	14123001583	2014-12-30 09:35:06	3	0	0	0	0	0		0	0	0	0	0	0	0		0	0	0		0				42	1	16010401763	2016-01-04 10:36:06	3	0	0	0	0	0		0	0	0	0	0	0	0		0	0	0		0
1416	16011800008	2016-01-18 08:07:11	3	0	0	0	0	0		0	0	0	0	0	0	0		0	0	0		0				44	1	17090700191	2017-09-07 09:07:44	1	0	0	0	0	0	0	0	0	0	0	0	0	0	0	0	0	0	0	0
1417	15060100784																									35		16060800920	2016-06-08 14:56:51	3	0	0	0	0	0		0	0	0	0	0	0	0		0	0	0		0
1418	15082100011																									41		16102901981	2016-10-29 16:05:27	3	0	0	0	0	0		0	0	0	0	0	0	0		0	0	0		0
1419	14112800160																									36		15122800167
1420	15042900491	2015-04-29 15:47:51	3	0	0	0	0	0		0	0	0	0	0	0	0		0	0	0		0				49	1	16051000140	2016-05-10 15:08:04	3	0	0	0	0	0		0	0	0	0	0	0	0		0	0	0		0
1421	14120300010																									29		15070701093
1422	14120300014																									30		15060100275
1423	14120800019																									42		16122902597	2016-12-29 13:47:05	2	0	0	0	0	0	0	0	0	0	0	0	0	0	0	0	0	0	0	0
1424	17022800119	2017-02-28 14:52:36	2	0	0	0	0	0	0	0	0	0	0	0	0	0	0	0	0	0	0	0	0	0	0	33	1
1425	14121000029																									56		15031200007	2015-03-12 07:47:56	3	0	0	0	0	0		0	0	0	0	0	0	0		0	0	0		0
1426	14121100033																									29		15060100524
1427	14123001334	2014-12-30 09:34:48	3	0	0	0	0	0		0	0	0	0	0	0	0		0	0	0		0				35	1	16010401448	2016-01-04 10:35:52	3	0	0	0	0	0		0	0	0	0	0	0	0		0	0	0		0
1428	14123001521	2014-12-30 09:35:01	3	0	0	0	0	0		0	0	0	0	0	0	0		0	0	0		0				38	1	16010401683	2016-01-04 10:36:02	3	0	0	0	0	0		0	0	0	0	0	0	0		0	0	0		0
1429	15042800074																									54		17042800005	2017-04-28 07:45:45	1	0	0	0	0	0	0	0	0	0	0	0	0	0	0	0	0	0	0	0
1430	14121800019																									32		16071800413
1431	15060100122																									42		16060800257	2016-06-08 14:56:22	3	0	0	0	0	0		0	0	0	0	0	0	0		0	0	0		0
1432	14121900007																									33		16010401076	2016-01-04 10:35:35	3	0	0	0	0	0		0	0	0	0	0	0	0		0	0	0		0
1433	14121900001																									37		16031600304	2016-03-16 14:38:32	3	0	0	0	0	0		0	0	0	0	0	0	0		0	0	0		0
1434	14123001389	2014-12-30 09:34:52	3	0	0	0	0	0		0	0	0	0	0	0	0		0	0	0		0				36	1	16010401510	2016-01-04 10:35:55	3	0	0	0	0	0		0	0	0	0	0	0	0		0	0	0		0
1435	16010402073	2016-01-04 10:36:19	3	0	0	0	0	0		0	0	0	0	0	0	0		0	0	0		0				56	1	17010600056	2017-01-06 09:14:34	2	0	0	0	0	0	0	0	0	0	0	0	0	0	0	0	0	0	0	0
1436	18051700441	2018-05-17 13:48:40	1	0	0	0	0	0	0	0	0	0	0	0	0	0	0	0	0	0	0	0	0	0	0	41	1
1437	14123002489	2014-12-30 09:36:11	2	1	0	0	0	0	0	0	0	0	0	0	0	0	0	0	1	0	0	0	0	0	0	44	1	16010401827	2016-01-04 10:36:08	2	1	0	0	0	0	0	0	0	0	0	0	0	1	0	0	1	0	0	0
1438	14123000030	2014-12-30 09:33:15	3	0	0	0	0	0		0	0	0	0	0	0	0		0	0	0		0				36	1	16010401529
1439	14123000031	2014-12-30 09:33:16	2	1	0	0	0	0	0	1	0	0	0	0	0	1	0	0	0	0	0	0	0	0	0	39	1	16010401694	2016-01-04 10:36:02	3	0	0	0	0	0		0	0	0	0	0	0	0		0	0	0		0
1440	14123000032	2014-12-30 09:33:16	3	0	0	0	0	0		0	0	0	0	0	0	0		0	0	0		0				43	1	16010401811	2016-01-04 10:36:07	3	0	0	0	0	0		0	0	0	0	0	0	0		0	0	0		0
1441	14123000033	2014-12-30 09:33:16	3	0	0	0	0	0		0	0	0	0	0	0	0		0	0	0		0				50	1	16010401990	2016-01-04 10:36:15	3	0	0	0	0	0		0	0	0	0	0	0	0		0	0	0		0
1442	14123000034	2014-12-30 09:33:16	3	0	0	0	0	0		0	0	0	0	0	0	0		0	0	0		0				52	1	16010402019	2016-01-04 10:36:16	3	0	0	0	0	0		0	0	0	0	0	0	0		0	0	0		0
1443	14123000203																									24		16010400507
1444	14123000204																									23		16010400514
1445	14123000205																									23		16010400517
1446	14123000207																									24		16010400533	2016-01-04 10:35:12	3	0	0	0	0	0		0	0	0	0	0	0	0		0	0	0		0
1447	14123000211																									25		16010400547	2016-01-04 10:35:13	2	1	0	0	0	0	0	0	1	0	0	0	0	0	0	0	0	0	0	0
1448	14123000218																									26		16010400567	2016-01-04 10:35:14	3	0	0	0	0	0		0	0	0	0	0	0	0		0	0	0		0
1449	14123000227																									25		16010400588	2016-01-04 10:35:14	3	0	0	0	0	0		0	0	0	0	0	0	0		0	0	0		0
1450	14123000237																									25		16010400610
1451	14123000239																									25		16010400613
1452	14123000253																									26		16010400638	2016-01-04 10:35:17	3	0	0	0	0	0		0	0	0	0	0	0	0		0	0	0		0
1453	16010400746																									27		16122902071	2016-12-29 13:46:43	2	0	0	0	0	0	0	0	0	0	0	0	0	0	0	0	0	0	0	0
1454	14123000257																									27		16010400644
1455	14123000262																									27		16010400652
1456	14123000263																									27		16010400654
1457	14123000265																									26		16010400658
1458	14123000266																									27		16010400763
1459	14123000267																									27		16010400663
1460	14123000271	2014-12-30 09:33:32	3	0	0	0	0	0		0	0	0	0	0	0	0		0	0	0		0				26	1	16010401147	2016-01-04 10:35:39	3	0	0	0	0	0		0	0	0	0	0	0	0		0	0	0		0
1461	14123000275																									27		16010400677	2016-01-04 10:35:18	3	0	0	0	0	0		0	0	0	0	0	0	0		0	0	0		0
1462	14123000277																									27		16010400679	2016-01-04 10:35:18	3	0	0	0	0	0		0	0	0	0	0	0	0		0	0	0		0
1463	14123000283																									27		16010400692
1464	14123000285																									27		16010400696
1465	14123000286																									27		16010400697
1466	14123000289																									27		16010400706	2016-01-04 10:35:19	3	0	0	0	0	0		0	0	0	0	0	0	0		0	0	0		0
1467	14123000292	2014-12-30 09:33:34	2	1	0	0	0	0	0	0	0	0	0	0	0	1	0	0	0	0	0	0	0	0	0	26	1	16010401149	2016-01-04 10:35:39	3	0	0	0	0	0		0	0	0	0	0	0	0		0	0	0		0
1468	14123000293																									27		16010400711	2016-01-04 10:35:20	2	1	0	0	1	0	0	0	0	0	0	0	0	0	0	0	0	0	0	0
1469	14123000298																									27		16010400718
1470	14123000299																									27		16010400721
1471	14123000300																									27		16010400722
1472	14123000309																									27		16010400732
1473	14123000314																									28		16010400739
1474	14123000316																									28		16010400743
1475	14123000322																									28		16010400754
1476	14123000327																									28		18010301147	2018-01-03 10:25:32	1	0	0	0	0	0	0	0	0	0	0	0	0	0	0	0	0	0	0	0
1477	14123000328																									28		16010400766
1478	14123000330																									28		16010400768	2016-01-04 10:35:22	3	0	0	0	0	0		0	0	0	0	0	0	0		0	0	0		0
1479	14123000333																									28		16010400773	2016-01-04 10:35:22	3	0	0	0	0	0		0	0	0	0	0	0	0		0	0	0		0
1480	14123000336																									27		16010400776
1481	14123000340																									28		16010400781	2016-01-04 10:35:23	3	0	0	0	0	0		0	0	0	0	0	0	0		0	0	0		0
1482	14123000346																									28		16010400789	2016-01-04 10:35:23	3	0	0	0	0	0		0	0	0	0	0	0	0		0	0	0		0
1483	14123000349																									28		16010400791	2016-01-04 10:35:23	3	0	0	0	0	0		0	0	0	0	0	0	0		0	0	0		0
1484	14123000350																									28		16010400792
1485	14123000351																									27		16010400793	2016-01-04 10:35:23	3	0	0	0	0	0		0	0	0	0	0	0	0		0	0	0		0
1486	14123000352																									28		16010400794
1487	14123000353																									27		16010400795	2016-01-04 10:35:23	3	0	0	0	0	0		0	0	0	0	0	0	0		0	0	0		0
1488	14123000354																									28		16010400796	2016-01-04 10:35:23	3	0	0	0	0	0		0	0	0	0	0	0	0		0	0	0		0
1489	14123000356																									28		16010400881
1490	14123000357																									27		16010400799
1491	14123000361																									28		16010402122
1492	14123000364																									28		16010400892
1493	14123000370	2014-12-30 09:33:39	3	0	0	0	0	0		0	0	0	0	0	0	0		0	0	0		0				28	1	16122901312
1494	14123000371																									27		16122901547	2016-12-29 13:46:21	2	0	0	0	0	0	0	0	0	0	0	0	0	0	0	0	0	0	0	0
1495	14123000374																									28		16010400820	2016-01-04 10:35:24	3	0	0	0	0	0		0	0	0	0	0	0	0		0	0	0		0
1496	14123000376																									28		16010400823
1497	14123000377																									27		16010400825
1498	14123000380																									29		16010400833	2016-01-04 10:35:25	3	0	0	0	0	0		0	0	0	0	0	0	0		0	0	0		0
1499	14123000381	2014-12-30 09:33:40	3	0	0	0	0	0		0	0	0	0	0	0	0		0	0	0		0				29	1	16010401162	2016-01-04 10:35:39	3	0	0	0	0	0		0	0	0	0	0	0	0		0	0	0		0
1500	14123000388																									28		16010400840	2016-01-04 10:35:25	3	0	0	0	0	0		0	0	0	0	0	0	0		0	0	0		0
1501	14123000389																									28		16010400842
1502	14123000400																									29		16010400858
1503	15011900022																									28		16010400860
1504	14123000402																									29		16010400862	2016-01-04 10:35:26	3	0	0	0	0	0		0	0	0	0	0	0	0		0	0	0		0
1505	14123000405																									29		16010400866
1506	14123000407	2014-12-30 09:33:42	3	0	0	0	0	0		0	0	0	0	0	0	0		0	0	0		0				29	1	16010401174
1507	14123000408																									28		16010400868	2016-01-04 10:35:26	3	0	0	0	0	0		0	0	0	0	0	0	0		0	0	0		0
1508	14123000410																									28		16010400870	2016-01-04 10:35:26	3	0	0	0	0	0		0	0	0	0	0	0	0		0	0	0		0
1509	14123000412																									28		16010400872
1510	14123000413																									29		16010400877	2016-01-04 10:35:27	3	0	0	0	0	0		0	0	0	0	0	0	0		0	0	0		0
1511	14123000417																									28		16010400888	2016-01-04 10:35:27	3	0	0	0	0	0		0	0	0	0	0	0	0		0	0	0		0
1512	14123000419																									29		16010400891
1513	14123000420																									28		16010400893	2016-01-04 10:35:27	3	0	0	0	0	0		0	0	0	0	0	0	0		0	0	0		0
1514	14123000421																									28		16010400895
1515	14123000423																									29		16010400897
1516	14123000425	2014-12-30 09:33:43	3	0	0	0	0	0		0	0	0	0	0	0	0		0	0	0		0				29	1	16010401179
1517	14123000426																									29		16010400900
1518	14123000428	2014-12-30 09:33:43	3	0	0	0	0	0		0	0	0	0	0	0	0		0	0	0		0				29	1	18010300592	2018-01-03 10:25:01	1	0	0	0	0	0	0	0	0	0	0	0	0	0	0	0	0	0	0	0
1519	14123000430																									28		16010400905	2016-01-04 10:35:28	3	0	0	0	0	0		0	0	0	0	0	0	0		0	0	0		0
1520	14123000434																									29		16010400911
1521	14123000436																									29		16010400914
1522	14123000441	2014-12-30 09:33:45	3	0	0	0	0	0		0	0	0	0	0	0	0		0	0	0		0				29	1	16010401194	2016-01-04 10:35:41	3	0	0	0	0	0		0	0	0	0	0	0	0		0	0	0		0
1523	14123000442																									29		16010400920
1524	14123000444																									29		16010400925	2016-01-04 10:35:29	2	1	0	0	0	0	0	0	0	0	0	1	0	0	0	0	0	0	0	0
1525	14123000445																									30		16010400927	2016-01-04 10:35:29	3	0	0	0	0	0		0	0	0	0	0	0	0		0	0	0		0
1526	14123000446																									30		16122901097	2016-12-29 13:46:01	2	0	0	0	0	0	0	0	0	0	0	0	0	0	0	0	0	0	0	0
1527	14123000448																									30		16010400932
1528	14123000450																									30		16010400934
1529	14123000452																									29		16010400939
1530	14123000456																									29		16010400944
1531	14123000457																									29		16010400945	2016-01-04 10:35:30	2	1	0	0	0	0	0	0	0	0	0	0	0	1	0	0	0	0	0	1
1532	14123000458																									29		16010400947
1533	14123000459																									30		16010400948	2016-01-04 10:35:30	3	0	0	0	0	0		0	0	0	0	0	0	0		0	0	0		0
1534	14123000460																									30		16010400949	2016-01-04 10:35:30	3	0	0	0	0	0		0	0	0	0	0	0	0		0	0	0		0
1535	14123000462																									29		16010400953	2016-01-04 10:35:30	3	0	0	0	0	0		0	0	0	0	0	0	0		0	0	0		0
1536	14123000464																									30		16010401008	2016-01-04 10:35:32	3	0	0	0	0	0		0	0	0	0	0	0	0		0	0	0		0
1537	14123000465																									29		16010400955
1538	14123000466																									29		16010401217	2016-01-04 10:35:42	3	0	0	0	0	0		0	0	0	0	0	0	0		0	0	0		0
1539	14123000470																									29		16010400961
1540	14123000471																									30		16010400963	2016-01-04 10:35:30	3	0	0	0	0	0		0	0	0	0	0	0	0		0	0	0		0
1541	14123000475																									30		16010400972	2016-01-04 10:35:31	2	1	0	0	0	0	0	0	0	0	0	0	0	1	0	0	0	0	0	0
1542	15010600035																									30		16010400976
1543	14123000480																									29		16010400977
1544	14123000481																									29		16010400978
1545	14123000482																									29		16010400979	2016-01-04 10:35:31	3	0	0	0	0	0		0	0	0	0	0	0	0		0	0	0		0
1546	14123000483	2014-12-30 09:33:47	3	0	0	0	0	0		0	0	0	0	0	0	0		0	0	0		0				30	1	16122901197	2016-12-29 13:46:05	2	0	0	0	0	0	0	0	0	0	0	0	0	0	0	0	0	0	0	0
1547	14123000484																									31		16010400982
1548	14123000485	2014-12-30 09:33:47	3	0	0	0	0	0		0	0	0	0	0	0	0		0	0	0		0				30	1	16010401230	2016-01-04 10:35:42	3	0	0	0	0	0		0	0	0	0	0	0	0		0	0	0		0
1549	14123000487																									30		16010400986	2016-01-04 10:35:31	3	0	0	0	0	0		0	0	0	0	0	0	0		0	0	0		0
1550	14123000489																									30		16010400988	2016-01-04 10:35:31	3	0	0	0	0	0		0	0	0	0	0	0	0		0	0	0		0
1551	14123000490																									30		16010400989
1552	14123000492																									30		16010400990	2016-01-04 10:35:31	3	0	0	0	0	0		0	0	0	0	0	0	0		0	0	0		0
1553	14123000493	2014-12-30 09:33:48	3	0	0	0	0	0		0	0	0	0	0	0	0		0	0	0		0				30	1	16122901531	2016-12-29 13:46:20	2	0	0	0	0	0	0	0	0	0	0	0	0	0	0	0	0	0	0	0
1554	14123000494																									31		16010400992
1555	14123000496																									31		16010400993
1556	14123000500																									31		16010400997	2016-01-04 10:35:32	3	0	0	0	0	0		0	0	0	0	0	0	0		0	0	0		0
1557	14123000502																									31		16010401001
1558	14123000504																									31		16010401003
1559	14123000505																									30		16010401004
1560	14123000506																									31		16010401009
1561	14123000508																									31		16010401013
1562	14123000509																									31		16010401015
1563	14123000513	2014-12-30 09:33:49	3	0	0	0	0	0		0	0	0	0	0	0	0		0	0	0		0				30	1	16122901188	2016-12-29 13:46:05	2	0	0	0	0	0	0	0	0	0	0	0	0	0	0	0	0	0	0	0
1564	14123000514																									31		16010401017
1565	14123000515	2014-12-30 09:33:49	3	0	0	0	0	0		0	0	0	0	0	0	0		0	0	0		0				31	1	16010401275	2016-01-04 10:35:44	3	0	0	0	0	0		0	0	0	0	0	0	0		0	0	0		0
1566	14123000516																									31		16010401018
1567	14123000517																									31		16010401019	2016-01-04 10:35:33	3	0	0	0	0	0		0	0	0	0	0	0	0		0	0	0		0
1568	14123000518																									31		16010401020	2016-01-04 10:35:33	2	1	0	0	0	0	0	1	0	0	0	0	0	0	0	0	0	0	0	0
1569	14123000521																									31		16122902229	2016-12-29 13:46:49	2	0	0	0	0	0	0	0	0	0	0	0	0	0	0	0	0	0	0	0
1570	14123000523																									32		16010401028
1571	14123000525																									31		16010401030
1572	14123000526	2014-12-30 09:33:50	3	0	0	0	0	0		0	0	0	0	0	0	0		0	0	0		0				32	1	16010401286	2016-01-04 10:35:45	3	0	0	0	0	0		0	0	0	0	0	0	0		0	0	0		0
1573	14123000527																									31		16010401031
1574	14123000529																									31		16010401032
1575	14123000530																									32		16010401034
1576	14123000532																									32		16010401308	2016-01-04 10:35:46	3	0	0	0	0	0		0	0	0	0	0	0	0		0	0	0		0
1577	14123000533																									31		16010401041
1578	14123000534																									31		16010401042
1579	14123000542																									32		16010401051
1580	14123000543																									32		16010401052
1581	16010401053																									32		16122902118	2016-12-29 13:46:45	2	0	0	0	0	0	0	0	0	0	0	0	0	0	0	0	0	0	0	0
1582	14123000545	2014-12-30 09:33:52	3	0	0	0	0	0		0	0	0	0	0	0	0		0	0	0		0				32	1	16010401337	2016-01-04 10:35:47	3	0	0	0	0	0		0	0	0	0	0	0	0		0	0	0		0
1583	14123000546																									32		16010401055	2016-01-04 10:35:34	3	0	0	0	0	0		0	0	0	0	0	0	0		0	0	0		0
1584	16122900908	2016-12-29 13:45:52	2	1	0	0	0	0	0	0	1	0	0	0	0	0	0	0	0	0	0	0	0	0	0	31	1	18010300295	2018-01-03 10:24:41	1	1	0	0	0	0	0	0	1	0	0	0	0	0	0	0	0	0	0	0
1585	14123000552	2014-12-30 09:33:52	3	0	0	0	0	0		0	0	0	0	0	0	0		0	0	0		0				33	1
1586	14123000553																									33		16010401066	2016-01-04 10:35:35	3	0	0	0	0	0		0	0	0	0	0	0	0		0	0	0		0
1587	14123000554																									33		16122901093
1588	14123000556																									32		16010401072	2016-01-04 10:35:35	3	0	0	0	0	0		0	0	0	0	0	0	0		0	0	0		0
1589	14123000558																									32		16122901185	2016-12-29 13:46:05	2	0	0	0	0	0	0	0	0	0	0	0	0	0	0	0	0	0	0	0
1590	14123000559																									33		16010401394
1591	14123000563																									34		16010401085
1592	14123000564																									33		16122901279
1593	14123000565																									33		16010401089	2016-01-04 10:35:36	3	0	0	0	0	0		0	0	0	0	0	0	0		0	0	0		0
1594	14123000567																									33		18010300575	2018-01-03 10:24:57	1	0	0	0	0	0	0	0	0	0	0	0	0	0	0	0	0	0	0	0
1595	14123000569																									34		16010401095	2016-01-04 10:35:36	2	1	0	0	0	0	0	0	0	0	0	0	0	1	0	0	0	0	0	0
1596	14123000570	2014-12-30 09:33:53	3	0	0	0	0	0		0	0	0	0	0	0	0		0	0	0		0				35	1	16010401449	2016-01-04 10:35:52	3	0	0	0	0	0		0	0	0	0	0	0	0		0	0	0		0
1597	14123000572	2014-12-30 09:33:54	3	0	0	0	0	0		0	0	0	0	0	0	0		0	0	0		0				35	1	16010401482	2016-01-04 10:35:54	3	0	0	0	0	0		0	0	0	0	0	0	0		0	0	0		0
1598	14123000574																									34		16010401099
1599	14123000575																									35		16010401100
1600	14123000576	2014-12-30 09:33:54	3	0	0	0	0	0		0	0	0	0	0	0	0		0	0	0		0				34	1	16122901113
1601	14123000578	2014-12-30 09:33:54	2	1	0	0	0	1	0	0	0	0	0	0	0	0	0	0	0	0	0	0	0	0	0	35	1	16010401525	2016-01-04 10:35:55	2	1	0	0	0	1	0	0	0	0	0	0	0	0	0	0	0	0	0	0
1602	16010401561	2016-01-04 10:35:57	3	0	0	0	0	0		0	0	0	0	0	0	0		0	0	0		0				35	1	18010301114	2018-01-03 10:25:30	1	0	0	0	0	0	0	0	0	0	0	0	0	0	0	0	0	0	0	0
1603	14123000581																									35		16010401104	2016-01-04 10:35:36	3	0	0	0	0	0		0	0	0	0	0	0	0		0	0	0		0
1604	14123000583																									36		16010401106
1605	14123000584	2014-12-30 09:33:54	2	0	0	0	0	0	0	0	0	0	0	0	0	0	0	0	0	0	0	0	0	0	0	36	1	16010401609	2016-01-04 10:35:59	3	0	0	0	0	0		0	0	0	0	0	0	0		0	0	0		0
1606	14123000588																									41		16010401733	2016-01-04 10:36:04	3	0	0	0	0	0		0	0	0	0	0	0	0		0	0	0		0
1607	14123000592																									26		16010400579
1608	14123000594																									26		16010400583
1609	14123000598																									26		16010400621
1610	14123000602	2014-12-30 09:33:56	3	0	0	0	0	0		0	0	0	0	0	0	0		0	0	0		0				27	1	16010401150	2016-01-04 10:35:39	3	0	0	0	0	0		0	0	0	0	0	0	0		0	0	0		0
1611	14123000603																									27		16010400760	2016-01-04 10:35:22	3	0	0	0	0	0		0	0	0	0	0	0	0		0	0	0		0
1612	14123000604																									27		16010400777	2016-01-04 10:35:22	3	0	0	0	0	0		0	0	0	0	0	0	0		0	0	0		0
1613	14123000606																									27		16010400815	2016-01-04 10:35:24	3	0	0	0	0	0		0	0	0	0	0	0	0		0	0	0		0
1614	14123000610																									27		16010400653
1615	14123000611																									27		16010400655	2016-01-04 10:35:17	3	0	0	0	0	0		0	0	0	0	0	0	0		0	0	0		0
1616	14123000614																									27		16010400703
1617	14123000617																									26		16010400635
1618	14123000618																									26		16010400649
1619	14123000628																									28		16010400753
1620	14123000632																									28		16010400772
1621	14123000634																									28		16010400812
1622	14123000637	2014-12-30 09:33:59	3	0	0	0	0	0		0	0	0	0	0	0	0		0	0	0		0				28	1	16010401157	2016-01-04 10:35:39	3	0	0	0	0	0		0	0	0	0	0	0	0		0	0	0		0
1623	14123000640																									28		16010400767
1624	14123000642																									27		16010400819	2016-01-04 10:35:24	3	0	0	0	0	0		0	0	0	0	0	0	0		0	0	0		0
1625	14123000644																									27		16122902446
1626	14123000646	2014-12-30 09:33:59	3	0	0	0	0	0		0	0	0	0	0	0	0		0	0	0		0				28	1	16010401175	2016-01-04 10:35:40	3	0	0	0	0	0		0	0	0	0	0	0	0		0	0	0		0
1627	16010400865	2016-01-04 10:35:26	3	0	0	0	0	0		0	0	0	0	0	0	0		0	0	0		0				29	1	16122901463	2016-12-29 13:46:17	2	0	0	0	0	0	0	0	0	0	0	0	0	0	0	0	0	0	0	0
1628	14123000650																									29		16010400906	2016-01-04 10:35:28	3	0	0	0	0	0		0	0	0	0	0	0	0		0	0	0		0
1629	14123000651																									29		16010400908
1630	14123000653																									28		16010400831
1631	15010800005																									29		16010400898
1632	14123000656																									29		16010400903
1633	14123000657	2014-12-30 09:34:00	3	0	0	0	0	0		0	0	0	0	0	0	0		0	0	0		0				29	1	16010401191	2016-01-04 10:35:40	3	0	0	0	0	0		0	0	0	0	0	0	0		0	0	0		0
1634	14123000658																									28		16010400841
1635	14123000660																									28		16010401167	2016-01-04 10:35:39	3	0	0	0	0	0		0	0	0	0	0	0	0		0	0	0		0
1636	14123000665																									28		16010400882
1637	14123000666																									29		16010400931
1638	14123000668	2014-12-30 09:34:01	3	0	0	0	0	0		0	0	0	0	0	0	0		0	0	0		0				29	1	16010401214	2016-01-04 10:35:41	3	0	0	0	0	0		0	0	0	0	0	0	0		0	0	0		0
1639	14123000669	2014-12-30 09:34:01	3	0	0	0	0	0		0	0	0	0	0	0	0		0	0	0		0				30	1	16010401216	2016-01-04 10:35:42	3	0	0	0	0	0		0	0	0	0	0	0	0		0	0	0		0
1640	14123000670																									30		16010400950
1641	14123000671																									29		16122901214	2016-12-29 13:46:06	2	0	0	0	0	0	0	0	0	0	0	0	0	0	0	0	0	0	0	0
1642	14123000672																									30		16010400951	2016-01-04 10:35:30	3	0	0	0	0	0		0	0	0	0	0	0	0		0	0	0		0
1643	14123000673	2014-12-30 09:34:01	3	0	0	0	0	0		0	0	0	0	0	0	0		0	0	0		0				30	1	16010401197	2016-01-04 10:35:41	3	0	0	0	0	0		0	0	0	0	0	0	0		0	0	0		0
1644	14123000676	2014-12-30 09:34:01	3	0	0	0	0	0		0	0	0	0	0	0	0		0	0	0		0				30	1	16010401204	2016-01-04 10:35:41	3	0	0	0	0	0		0	0	0	0	0	0	0		0	0	0		0
1645	14123000682	2014-12-30 09:34:02	3	0	0	0	0	0		0	0	0	0	0	0	0		0	0	0		0				30	1	16010401231	2016-01-04 10:35:42	3	0	0	0	0	0		0	0	0	0	0	0	0		0	0	0		0
1646	14123000683																									30		16010401016	2016-01-04 10:35:32	3	0	0	0	0	0		0	0	0	0	0	0	0		0	0	0		0
1647	14123000684	2014-12-30 09:34:02	3	0	0	0	0	0		0	0	0	0	0	0	0		0	0	0		0				30	1	16010401233	2016-01-04 10:35:42	3	0	0	0	0	0		0	0	0	0	0	0	0		0	0	0		0
1648	14123000685	2014-12-30 09:34:02	3	0	0	0	0	0		0	0	0	0	0	0	0		0	0	0		0				31	1	16010401241	2016-01-04 10:35:43	2	1	0	0	0	0	0	0	0	0	0	0	0	1	0	0	0	0	0	0
1649	14123000691	2014-12-30 09:34:02	3	0	0	0	0	0		0	0	0	0	0	0	0		0	0	0		0				31	1	16010401239	2016-01-04 10:35:43	3	0	0	0	0	0		0	0	0	0	0	0	0		0	0	0		0
1650	14123000693																									31		16010401058	2016-01-04 10:35:34	3	0	0	0	0	0		0	0	0	0	0	0	0		0	0	0		0
1651	14123000697																									32		16010401033
1652	14123000698																									33		16010401062
1653	14123000701	2014-12-30 09:34:03	3	0	0	0	0	0		0	0	0	0	0	0	0		0	0	0		0				33	1	16010401393	2016-01-04 10:35:49	3	0	0	0	0	0		0	0	0	0	0	0	0		0	0	0		0
1654	14123000702																									32		16010401068	2016-01-04 10:35:35	3	0	0	0	0	0		0	0	0	0	0	0	0		0	0	0		0
1655	14123000707																									34		16010401406	2016-01-04 10:35:50	3	0	0	0	0	0		0	0	0	0	0	0	0		0	0	0		0
1656	14123000709	2014-12-30 09:34:03	3	0	0	0	0	0		0	0	0	0	0	0	0		0	0	0		0				35	1	16010401496	2016-01-04 10:35:54	3	0	0	0	0	0		0	0	0	0	0	0	0		0	0	0		0
1657	14123000710	2014-12-30 09:34:03	3	0	0	0	0	0		0	0	0	0	0	0	0		0	0	0		0				36	1	16010401602
1658	14123000713																									42		16010401114	2016-01-04 10:35:37	3	0	0	0	0	0		0	0	0	0	0	0	0		0	0	0		0
1659	14123001015	2014-12-30 09:34:25	3	0	0	0	0	0		0	0	0	0	0	0	0		0	0	0		0				77	1	15123100094	2015-12-31 14:16:17	3	0	0	0	0	0		0	0	0	0	0	0	0		0	0	0		0
1660	14123001110	2014-12-30 09:34:32	3	0	0	0	0	0		0	0	0	0	0	0	0		0	0	0		0				25	1	16010401143	2016-01-04 10:35:38	3	0	0	0	0	0		0	0	0	0	0	0	0		0	0	0		0
1661	16010401144	2016-01-04 10:35:38	3	0	0	0	0	0		0	0	0	0	0	0	0		0	0	0		0				26	1
1662	14123001113	2014-12-30 09:34:32	3	0	0	0	0	0		0	0	0	0	0	0	0		0	0	0		0				26	1	16010401148
1663	14123001114	2014-12-30 09:34:32	3	0	0	0	0	0		0	0	0	0	0	0	0		0	0	0		0				27	1	16010401152	2016-01-04 10:35:39	3	0	0	0	0	0		0	0	0	0	0	0	0		0	0	0		0
1664	14123001115																									27		16010401153	2016-01-04 10:35:39	3	0	0	0	0	0		0	0	0	0	0	0	0		0	0	0		0
1665	14123001116	2014-12-30 09:34:32	3	0	0	0	0	0		0	0	0	0	0	0	0		0	0	0		0				28	1
1666	14123001117	2014-12-30 09:34:32	3	0	0	0	0	0		0	0	0	0	0	0	0		0	0	0		0				27	1
1667	14123001119	2014-12-30 09:34:32	3	0	0	0	0	0		0	0	0	0	0	0	0		0	0	0		0				28	1	16010401154	2016-01-04 10:35:39	2	1	0	0	0	0	0	0	0	0	0	1	0	0	0	0	0	0	0	0
1668	14123001120	2014-12-30 09:34:32	3	0	0	0	0	0		0	0	0	0	0	0	0		0	0	0		0				27	1	16010401156	2016-01-04 10:35:39	3	0	0	0	0	0		0	0	0	0	0	0	0		0	0	0		0
1669	14123001121	2014-12-30 09:34:32	3	0	0	0	0	0		0	0	0	0	0	0	0		0	0	0		0				28	1	16010401158	2016-01-04 10:35:39	3	0	0	0	0	0		0	0	0	0	0	0	0		0	0	0		0
1670	16010401159	2016-01-04 10:35:39	3	0	0	0	0	0		0	0	0	0	0	0	0		0	0	0		0				27	1
1671	14123001124	2014-12-30 09:34:32	3	0	0	0	0	0		0	0	0	0	0	0	0		0	0	0		0				28	1	16122901510	2016-12-29 13:46:19	2	0	0	0	0	0	0	0	0	0	0	0	0	0	0	0	0	0	0	0
1672	14123001126																									28		16010401163	2016-01-04 10:35:39	3	0	0	0	0	0		0	0	0	0	0	0	0		0	0	0		0
1673	14123001127	2014-12-30 09:34:33	2	1	0	0	1	0	0	0	0	0	0	0	0	0	0	0	0	0	0	0	0	0	0	29	1	16010401165
1674	14123001128	2014-12-30 09:34:33	3	0	0	0	0	0		0	0	0	0	0	0	0		0	0	0		0				29	1
1675	14123001129	2014-12-30 09:34:33	3	0	0	0	0	0		0	0	0	0	0	0	0		0	0	0		0				29	1
1676	14123001130	2014-12-30 09:34:34	2	1	0	0	0	1	0	0	0	0	0	0	0	0	0	0	0	0	0	0	0	0	0	28	1
1677	14123001131	2014-12-30 09:34:34	3	0	0	0	0	0		0	0	0	0	0	0	0		0	0	0		0				29	1	16010401168
1678	14123001132	2014-12-30 09:34:34	3	0	0	0	0	0		0	0	0	0	0	0	0		0	0	0		0				29	1
1679	14123001133	2014-12-30 09:34:34	3	0	0	0	0	0		0	0	0	0	0	0	0		0	0	0		0				29	1	16010401170	2016-01-04 10:35:39	3	0	0	0	0	0		0	0	0	0	0	0	0		0	0	0		0
1680	14123001134																									28		16010401171	2016-01-04 10:35:40	3	0	0	0	0	0		0	0	0	0	0	0	0		0	0	0		0
1681	14123001135	2014-12-30 09:34:34	3	0	0	0	0	0		0	0	0	0	0	0	0		0	0	0		0				28	1	16122900933	2016-12-29 13:45:53	2	0	0	0	0	0	0	0	0	0	0	0	0	0	0	0	0	0	0	0
1682	14123001136	2014-12-30 09:34:34	3	0	0	0	0	0		0	0	0	0	0	0	0		0	0	0		0				29	1	16010401176	2016-01-04 10:35:40	3	0	0	0	0	0		0	0	0	0	0	0	0		0	0	0		0
1683	14123001137	2014-12-30 09:34:34	3	0	0	0	0	0		0	0	0	0	0	0	0		0	0	0		0				29	1	16010401177	2016-01-04 10:35:40	3	0	0	0	0	0		0	0	0	0	0	0	0		0	0	0		0
1684	14123001139	2014-12-30 09:34:34	3	0	0	0	0	0		0	0	0	0	0	0	0		0	0	0		0				29	1	16122901534	2016-12-29 13:46:20	2	0	0	0	0	0	0	0	0	0	0	0	0	0	0	0	0	0	0	0
1685	14123001140	2014-12-30 09:34:34	3	0	0	0	0	0		0	0	0	0	0	0	0		0	0	0		0				28	1	16010401182	2016-01-04 10:35:40	3	0	0	0	0	0		0	0	0	0	0	0	0		0	0	0		0
1686	14123001141	2014-12-30 09:34:34	3	0	0	0	0	0		0	0	0	0	0	0	0		0	0	0		0				28	1	16010401183	2016-01-04 10:35:40	3	0	0	0	0	0		0	0	0	0	0	0	0		0	0	0		0
1687	14123001142	2014-12-30 09:34:34	3	0	0	0	0	0		0	0	0	0	0	0	0		0	0	0		0				28	1	16122901221
1688	14123001144																									29		16010401190
1689	14123001145	2014-12-30 09:34:35	3	0	0	0	0	0		0	0	0	0	0	0	0		0	0	0		0				28	1	16010401192	2016-01-04 10:35:40	3	0	0	0	0	0		0	0	0	0	0	0	0		0	0	0		0
1690	14123001147	2014-12-30 09:34:35	3	0	0	0	0	0		0	0	0	0	0	0	0		0	0	0		0				30	1	16010401195	2016-01-04 10:35:41	3	0	0	0	0	0		0	0	0	0	0	0	0		0	0	0		0
1691	14123001149																									30		16010401200	2016-01-04 10:35:41	3	0	0	0	0	0		0	0	0	0	0	0	0		0	0	0		0
1692	14123001150	2014-12-30 09:34:35	3	0	0	0	0	0		0	0	0	0	0	0	0		0	0	0		0				30	1	16010401201	2016-01-04 10:35:41	3	0	0	0	0	0		0	0	0	0	0	0	0		0	0	0		0
1693	14123001151	2014-12-30 09:34:35	3	0	0	0	0	0		0	0	0	0	0	0	0		0	0	0		0				29	1	16010401202	2016-01-04 10:35:41	3	0	0	0	0	0		0	0	0	0	0	0	0		0	0	0		0
1694	14123001152	2014-12-30 09:34:35	3	0	0	0	0	0		0	0	0	0	0	0	0		0	0	0		0				30	1	15031900009
1695	14123001153	2014-12-30 09:34:35	3	0	0	0	0	0		0	0	0	0	0	0	0		0	0	0		0				29	1	16010401207	2016-01-04 10:35:41	3	0	0	0	0	0		0	0	0	0	0	0	0		0	0	0		0
1696	14123001154	2014-12-30 09:34:35	3	0	0	0	0	0		0	0	0	0	0	0	0		0	0	0		0				30	1	16122902161	2016-12-29 13:46:47	2	0	0	0	0	0	0	0	0	0	0	0	0	0	0	0	0	0	0	0
1697	14123001155																									30		16010401209	2016-01-04 10:35:41	3	0	0	0	0	0		0	0	0	0	0	0	0		0	0	0		0
1698	14123001156	2014-12-30 09:34:35	3	0	0	0	0	0		0	0	0	0	0	0	0		0	0	0		0				30	1	16010401210	2016-01-04 10:35:41	2	1	0	0	0	0	0	0	0	0	0	0	0	0	0	0	0	1	0	0
1699	14123001157	2014-12-30 09:34:35	3	0	0	0	0	0		0	0	0	0	0	0	0		0	0	0		0				30	1	16010401246	2016-01-04 10:35:43	3	0	0	0	0	0		0	0	0	0	0	0	0		0	0	0		0
1700	14123001158	2014-12-30 09:34:35	3	0	0	0	0	0		0	0	0	0	0	0	0		0	0	0		0				30	1	16010401212	2016-01-04 10:35:41	3	0	0	0	0	0		0	0	0	0	0	0	0		0	0	0		0
1701	14123001159	2014-12-30 09:34:35	3	0	0	0	0	0		0	0	0	0	0	0	0		0	0	0		0				30	1
1702	16010401213	2016-01-04 10:35:41	3	0	0	0	0	0		0	0	0	0	0	0	0		0	0	0		0				30	1	16122902365
1703	14123001162	2014-12-30 09:34:36	2	1	0	0	0	0	0	0	0	0	0	0	0	1	0	0	0	0	0	0	0	0	0	30	1	16010401220	2016-01-04 10:35:42	2	1	0	0	0	0	0	0	0	0	0	0	0	1	0	0	0	0	0	0
1704	14123001163	2014-12-30 09:34:36	3	0	0	0	0	0		0	0	0	0	0	0	0		0	0	0		0				29	1	16010401221	2016-01-04 10:35:42	3	0	0	0	0	0		0	0	0	0	0	0	0		0	0	0		0
1705	14123001164	2014-12-30 09:34:36	3	0	0	0	0	0		0	0	0	0	0	0	0		0	0	0		0				29	1	16010401222	2016-01-04 10:35:42	3	0	0	0	0	0		0	0	0	0	0	0	0		0	0	0		0
1706	14123001165	2014-12-30 09:34:36	3	0	0	0	0	0		0	0	0	0	0	0	0		0	0	0		0				29	1	16010401223	2016-01-04 10:35:42	3	0	0	0	0	0		0	0	0	0	0	0	0		0	0	0		0
1707	14123001166	2014-12-30 09:34:36	3	0	0	0	0	0		0	0	0	0	0	0	0		0	0	0		0				30	1	16010401224	2016-01-04 10:35:42	3	0	0	0	0	0		0	0	0	0	0	0	0		0	0	0		0
1708	14123001168	2014-12-30 09:34:36	3	0	0	0	0	0		0	0	0	0	0	0	0		0	0	0		0				30	1	16010401226	2016-01-04 10:35:42	3	0	0	0	0	0		0	0	0	0	0	0	0		0	0	0		0
1709	16010401227	2016-01-04 10:35:42	3	0	0	0	0	0		0	0	0	0	0	0	0		0	0	0		0				30	1	16122901294	2016-12-29 13:46:10	2	0	0	0	0	0	0	0	0	0	0	0	0	0	0	0	0	0	0	0
1710	14123001170	2014-12-30 09:34:36	3	0	0	0	0	0		0	0	0	0	0	0	0		0	0	0		0				31	1	16010401229	2016-01-04 10:35:42	3	0	0	0	0	0		0	0	0	0	0	0	0		0	0	0		0
1711	14123001171	2014-12-30 09:34:36	3	0	0	0	0	0		0	0	0	0	0	0	0		0	0	0		0				31	1	16010401232	2016-01-04 10:35:42	3	0	0	0	0	0		0	0	0	0	0	0	0		0	0	0		0
1712	14123001172	2014-12-30 09:34:36	3	0	0	0	0	0		0	0	0	0	0	0	0		0	0	0		0				31	1
1713	14123001173	2014-12-30 09:34:36	3	0	0	0	0	0		0	0	0	0	0	0	0		0	0	0		0				31	1	16010401236	2016-01-04 10:35:43	3	0	0	0	0	0		0	0	0	0	0	0	0		0	0	0		0
1714	14123001174	2014-12-30 09:34:36	3	0	0	0	0	0		0	0	0	0	0	0	0		0	0	0		0				31	1	16010401237	2016-01-04 10:35:43	3	0	0	0	0	0		0	0	0	0	0	0	0		0	0	0		0
1715	14123001176	2014-12-30 09:34:37	3	0	0	0	0	0		0	0	0	0	0	0	0		0	0	0		0				30	1	16010401244	2016-01-04 10:35:43	3	0	0	0	0	0		0	0	0	0	0	0	0		0	0	0		0
1716	14123001177	2014-12-30 09:34:37	3	0	0	0	0	0		0	0	0	0	0	0	0		0	0	0		0				30	1	16010401245
1717	14123001178	2014-12-30 09:34:37	3	0	0	0	0	0		0	0	0	0	0	0	0		0	0	0		0				31	1
1718	14123001179	2014-12-30 09:34:37	3	0	0	0	0	0		0	0	0	0	0	0	0		0	0	0		0				31	1	16010401247	2016-01-04 10:35:43	3	0	0	0	0	0		0	0	0	0	0	0	0		0	0	0		0
1719	14123001180	2014-12-30 09:34:37	3	0	0	0	0	0		0	0	0	0	0	0	0		0	0	0		0				31	1
1720	14123001181	2014-12-30 09:34:37	3	0	0	0	0	0		0	0	0	0	0	0	0		0	0	0		0				30	1	16010401248	2016-01-04 10:35:43	3	0	0	0	0	0		0	0	0	0	0	0	0		0	0	0		0
1721	14123001182	2014-12-30 09:34:37	3	0	0	0	0	0		0	0	0	0	0	0	0		0	0	0		0				30	1	16122902387	2016-12-29 13:46:56	2	0	0	0	0	0	0	0	0	0	0	0	0	0	0	0	0	0	0	0
1722	14123001183	2014-12-30 09:34:37	3	0	0	0	0	0		0	0	0	0	0	0	0		0	0	0		0				31	1
1723	14123001184	2014-12-30 09:34:37	3	0	0	0	0	0		0	0	0	0	0	0	0		0	0	0		0				31	1	16010401251	2016-01-04 10:35:43	3	0	0	0	0	0		0	0	0	0	0	0	0		0	0	0		0
1724	14123001185	2014-12-30 09:34:37	3	0	0	0	0	0		0	0	0	0	0	0	0		0	0	0		0				30	1	16010401254	2016-01-04 10:35:43	3	0	0	0	0	0		0	0	0	0	0	0	0		0	0	0		0
1725	14123001186	2014-12-30 09:34:37	3	0	0	0	0	0		0	0	0	0	0	0	0		0	0	0		0				31	1	16010401255	2016-01-04 10:35:44	3	0	0	0	0	0		0	0	0	0	0	0	0		0	0	0		0
1726	14123001188	2014-12-30 09:34:37	3	0	0	0	0	0		0	0	0	0	0	0	0		0	0	0		0				31	1	16010401261	2016-01-04 10:35:44	3	0	0	0	0	0		0	0	0	0	0	0	0		0	0	0		0
1727	14123001191																									30		16010401265	2016-01-04 10:35:44	3	0	0	0	0	0		0	0	0	0	0	0	0		0	0	0		0
1728	16010401266	2016-01-04 10:35:44	3	0	0	0	0	0		0	0	0	0	0	0	0		0	0	0		0				31	1	16122900967	2016-12-29 13:45:55	2	0	0	0	0	0	0	0	0	0	0	0	0	0	0	0	0	0	0	0
1729	14123001193																									31		16010401267	2016-01-04 10:35:44	3	0	0	0	0	0		0	0	0	0	0	0	0		0	0	0		0
1730	14123001194	2014-12-30 09:34:38	3	0	0	0	0	0		0	0	0	0	0	0	0		0	0	0		0				31	1	16010401269	2016-01-04 10:35:44	3	0	0	0	0	0		0	0	0	0	0	0	0		0	0	0		0
1731	14123001195	2014-12-30 09:34:38	3	0	0	0	0	0		0	0	0	0	0	0	0		0	0	0		0				30	1	16010401271	2016-01-04 10:35:44	2	1	1	0	0	0	0	0	0	0	0	0	1	0	0	0	0	0	0	0
1732	14123001196	2014-12-30 09:34:38	2	1	0	0	0	0	0	0	1	0	0	0	0	0	0	0	0	0	0	0	0	0	0	31	1	16010401272	2016-01-04 10:35:44	3	0	0	0	0	0		0	0	0	0	0	0	0		0	0	0		0
1733	14123001197	2014-12-30 09:34:38	3	0	0	0	0	0		0	0	0	0	0	0	0		0	0	0		0				30	1	16010401274	2016-01-04 10:35:44	3	0	0	0	0	0		0	0	0	0	0	0	0		0	0	0		0
1734	14123001199	2014-12-30 09:34:38	3	0	0	0	0	0		0	0	0	0	0	0	0		0	0	0		0				31	1	16010401276	2016-01-04 10:35:44	3	0	0	0	0	0		0	0	0	0	0	0	0		0	0	0		0
1735	14123001200	2014-12-30 09:34:38	3	0	0	0	0	0		0	0	0	0	0	0	0		0	0	0		0				31	1	16010401278	2016-01-04 10:35:44	3	0	0	0	0	0		0	0	0	0	0	0	0		0	0	0		0
1736	16010401279	2016-01-04 10:35:44	3	0	0	0	0	0		0	0	0	0	0	0	0		0	0	0		0				30	1
1737	14123001203	2014-12-30 09:34:38	3	0	0	0	0	0		0	0	0	0	0	0	0		0	0	0		0				31	1	16122900942	2016-12-29 13:45:54	2	0	0	0	0	0	0	0	0	0	0	0	0	0	0	0	0	0	0	0
1738	14123001204	2014-12-30 09:34:38	3	0	0	0	0	0		0	0	0	0	0	0	0		0	0	0		0				31	1	16010401283	2016-01-04 10:35:45	3	0	0	0	0	0		0	0	0	0	0	0	0		0	0	0		0
1739	14123001205	2014-12-30 09:34:39	3	0	0	0	0	0		0	0	0	0	0	0	0		0	0	0		0				31	1	16010401284	2016-01-04 10:35:45	3	0	0	0	0	0		0	0	0	0	0	0	0		0	0	0		0
1740	14123001207	2014-12-30 09:34:39	3	0	0	0	0	0		0	0	0	0	0	0	0		0	0	0		0				32	1	16122901095	2016-12-29 13:46:01	2	0	0	0	0	0	0	0	0	0	0	0	0	0	0	0	0	0	0	0
1741	14123001208	2014-12-30 09:34:39	3	0	0	0	0	0		0	0	0	0	0	0	0		0	0	0		0				32	1	16010401288	2016-01-04 10:35:45	3	0	0	0	0	0		0	0	0	0	0	0	0		0	0	0		0
1742	14123001209	2014-12-30 09:34:39	3	0	0	0	0	0		0	0	0	0	0	0	0		0	0	0		0				31	1	16011800009	2016-01-18 08:13:05	3	0	0	0	0	0		0	0	0	0	0	0	0		0	0	0		0
1743	14123001210	2014-12-30 09:34:39	3	0	0	0	0	0		0	0	0	0	0	0	0		0	0	0		0				31	1
1744	14123001211																									32		16010401289	2016-01-04 10:35:45	3	0	0	0	0	0		0	0	0	0	0	0	0		0	0	0		0
1745	14123001212	2014-12-30 09:34:39	3	0	0	0	0	0		0	0	0	0	0	0	0		0	0	0		0				32	1	16010401290
1746	14123001213	2014-12-30 09:34:39	3	0	0	0	0	0		0	0	0	0	0	0	0		0	0	0		0				32	1	16010401292	2016-01-04 10:35:45	3	0	0	0	0	0		0	0	0	0	0	0	0		0	0	0		0
1747	14123001214	2014-12-30 09:34:39	3	0	0	0	0	0		0	0	0	0	0	0	0		0	0	0		0				32	1	16010401297	2016-01-04 10:35:45	3	0	0	0	0	0		0	0	0	0	0	0	0		0	0	0		0
1748	14123001215	2014-12-30 09:34:39	3	0	0	0	0	0		0	0	0	0	0	0	0		0	0	0		0				32	1	16010401299	2016-01-04 10:35:45	3	0	0	0	0	0		0	0	0	0	0	0	0		0	0	0		0
1749	14123001216	2014-12-30 09:34:39	3	0	0	0	0	0		0	0	0	0	0	0	0		0	0	0		0				32	1	16010401302	2016-01-04 10:35:45	3	0	0	0	0	0		0	0	0	0	0	0	0		0	0	0		0
1750	14123001217	2014-12-30 09:34:39	3	0	0	0	0	0		0	0	0	0	0	0	0		0	0	0		0				31	1	16010401305	2016-01-04 10:35:45	3	0	0	0	0	0		0	0	0	0	0	0	0		0	0	0		0
1751	14123001218	2014-12-30 09:34:39	2	1	0	0	1	0	0	0	0	0	0	0	0	0	0	0	0	0	0	0	0	0	0	31	1	16010401307	2016-01-04 10:35:46	3	0	0	0	0	0		0	0	0	0	0	0	0		0	0	0		0
1752	14123001219	2014-12-30 09:34:39	3	0	0	0	0	0		0	0	0	0	0	0	0		0	0	0		0				32	1	16010401309	2016-01-04 10:35:46	3	0	0	0	0	0		0	0	0	0	0	0	0		0	0	0		0
1753	14123001222	2014-12-30 09:34:40	3	0	0	0	0	0		0	0	0	0	0	0	0		0	0	0		0				31	1	16010401311	2016-01-04 10:35:46	3	0	0	0	0	0		0	0	0	0	0	0	0		0	0	0		0
1754	14123001223	2014-12-30 09:34:40	3	0	0	0	0	0		0	0	0	0	0	0	0		0	0	0		0				31	1	16010401312	2016-01-04 10:35:46	3	0	0	0	0	0		0	0	0	0	0	0	0		0	0	0		0
1755	14123001224	2014-12-30 09:34:40	3	0	0	0	0	0		0	0	0	0	0	0	0		0	0	0		0				31	1	16010401313	2016-01-04 10:35:46	3	0	0	0	0	0		0	0	0	0	0	0	0		0	0	0		0
1756	14123001225	2014-12-30 09:34:40	3	0	0	0	0	0		0	0	0	0	0	0	0		0	0	0		0				31	1	16010401315
1757	14123001227	2014-12-30 09:34:40	3	0	0	0	0	0		0	0	0	0	0	0	0		0	0	0		0				31	1	16010401317
1758	14123001228	2014-12-30 09:34:40	2	1	0	0	0	0	0	0	0	1	0	0	0	0	0	0	0	0	0	0	0	0	0	31	1	16122901652
1759	14123001230	2014-12-30 09:34:41	3	0	0	0	0	0		0	0	0	0	0	0	0		0	0	0		0				32	1	16010401320	2016-01-04 10:35:46	3	0	0	0	0	0		0	0	0	0	0	0	0		0	0	0		0
1760	14123001231	2014-12-30 09:34:41	3	0	0	0	0	0		0	0	0	0	0	0	0		0	0	0		0				32	1	16010401321	2016-01-04 10:35:46	3	0	0	0	0	0		0	0	0	0	0	0	0		0	0	0		0
1761	14123001232	2014-12-30 09:34:41	3	0	0	0	0	0		0	0	0	0	0	0	0		0	0	0		0				32	1	16010401323	2016-01-04 10:35:46	3	0	0	0	0	0		0	0	0	0	0	0	0		0	0	0		0
1762	14123001233	2014-12-30 09:34:41	3	0	0	0	0	0		0	0	0	0	0	0	0		0	0	0		0				32	1	16010401324	2016-01-04 10:35:46	3	0	0	0	0	0		0	0	0	0	0	0	0		0	0	0		0
1763	14123001234	2014-12-30 09:34:41	3	0	0	0	0	0		0	0	0	0	0	0	0		0	0	0		0				32	1	16010401325	2016-01-04 10:35:46	3	0	0	0	0	0		0	0	0	0	0	0	0		0	0	0		0
1764	14123001235	2014-12-30 09:34:41	3	0	0	0	0	0		0	0	0	0	0	0	0		0	0	0		0				31	1	16010401326	2016-01-04 10:35:46	3	0	0	0	0	0		0	0	0	0	0	0	0		0	0	0		0
1765	14123001236	2014-12-30 09:34:41	3	0	0	0	0	0		0	0	0	0	0	0	0		0	0	0		0				32	1	16010401327	2016-01-04 10:35:46	3	0	0	0	0	0		0	0	0	0	0	0	0		0	0	0		0
1766	14123001237	2014-12-30 09:34:41	3	0	0	0	0	0		0	0	0	0	0	0	0		0	0	0		0				32	1	16010401328	2016-01-04 10:35:46	3	0	0	0	0	0		0	0	0	0	0	0	0		0	0	0		0
1767	14123001238	2014-12-30 09:34:41	3	0	0	0	0	0		0	0	0	0	0	0	0		0	0	0		0				32	1	18010300879	2018-01-03 10:25:19	1	0	0	0	0	0	0	0	0	0	0	0	0	0	0	0	0	0	0	0
1768	14123001239	2014-12-30 09:34:41	3	0	0	0	0	0		0	0	0	0	0	0	0		0	0	0		0				31	1
1769	14123001240																									32		16010401332
1770	14123001241	2014-12-30 09:34:42	3	0	0	0	0	0		0	0	0	0	0	0	0		0	0	0		0				32	1	16010401333	2016-01-04 10:35:47	3	0	0	0	0	0		0	0	0	0	0	0	0		0	0	0		0
1771	14123001242	2014-12-30 09:34:42	2	1	0	0	1	0	0	0	0	0	0	0	0	0	0	0	0	0	0	0	0	0	0	32	1	16010401334	2016-01-04 10:35:47	3	0	0	0	0	0		0	0	0	0	0	0	0		0	0	0		0
1772	14123001243																									32		16010401335	2016-01-04 10:35:47	3	0	0	0	0	0		0	0	0	0	0	0	0		0	0	0		0
1773	14123001244																									32		16010401336	2016-01-04 10:35:47	3	0	0	0	0	0		0	0	0	0	0	0	0		0	0	0		0
1774	16122902398	2016-12-29 13:46:56	2	0	0	0	0	0	0	0	0	0	0	0	0	0	0	0	0	0	0	0	0	0	0	31	1	18010301637	2018-01-03 10:26:01	1	0	0	0	0	0	0	0	0	0	0	0	0	0	0	0	0	0	0	0
1775	14123001246	2014-12-30 09:34:42	3	0	0	0	0	0		0	0	0	0	0	0	0		0	0	0		0				32	1	16010401340	2016-01-04 10:35:47	3	0	0	0	0	0		0	0	0	0	0	0	0		0	0	0		0
1776	14123001247	2014-12-30 09:34:42	3	0	0	0	0	0		0	0	0	0	0	0	0		0	0	0		0				32	1	16010401341	2016-01-04 10:35:47	3	0	0	0	0	0		0	0	0	0	0	0	0		0	0	0		0
1777	14123001248	2014-12-30 09:34:42	3	0	0	0	0	0		0	0	0	0	0	0	0		0	0	0		0				32	1	16010401342	2016-01-04 10:35:47	3	0	0	0	0	0		0	0	0	0	0	0	0		0	0	0		0
1778	14123001249	2014-12-30 09:34:42	3	0	0	0	0	0		0	0	0	0	0	0	0		0	0	0		0				31	1	16010401343	2016-01-04 10:35:47	3	0	0	0	0	0		0	0	0	0	0	0	0		0	0	0		0
1779	14123001250	2014-12-30 09:34:42	3	0	0	0	0	0		0	0	0	0	0	0	0		0	0	0		0				32	1
1780	14123001251																									33		16010401346	2016-01-04 10:35:47	3	0	0	0	0	0		0	0	0	0	0	0	0		0	0	0		0
1781	14123001253	2014-12-30 09:34:42	3	0	0	0	0	0		0	0	0	0	0	0	0		0	0	0		0				33	1	16010401348	2016-01-04 10:35:48	3	0	0	0	0	0		0	0	0	0	0	0	0		0	0	0		0
1782	14123001254	2014-12-30 09:34:42	3	0	0	0	0	0		0	0	0	0	0	0	0		0	0	0		0				33	1	16010401350	2016-01-04 10:35:48	3	0	0	0	0	0		0	0	0	0	0	0	0		0	0	0		0
1783	15010800009	2015-01-08 07:38:18	3	0	0	0	0	0		0	0	0	0	0	0	0		0	0	0		0				33	1	16010401351
1784	14123001256																									33		16010401352	2016-01-04 10:35:48	3	0	0	0	0	0		0	0	0	0	0	0	0		0	0	0		0
1785	14123001257	2014-12-30 09:34:43	3	0	0	0	0	0		0	0	0	0	0	0	0		0	0	0		0				33	1	16010401124	2016-01-04 10:35:37	3	0	0	0	0	0		0	0	0	0	0	0	0		0	0	0		0
1786	14123001258	2014-12-30 09:34:43	3	0	0	0	0	0		0	0	0	0	0	0	0		0	0	0		0				32	1	16010401354	2016-01-04 10:35:48	2	1	0	0	0	0	0	0	0	1	0	0	1	0	0	1	0	0	0	0
1787	14123001259	2014-12-30 09:34:43	3	0	0	0	0	0		0	0	0	0	0	0	0		0	0	0		0				32	1	16010401355	2016-01-04 10:35:48	3	0	0	0	0	0		0	0	0	0	0	0	0		0	0	0		0
1788	14123001260	2014-12-30 09:34:43	3	0	0	0	0	0		0	0	0	0	0	0	0		0	0	0		0				32	1	16010401356	2016-01-04 10:35:48	3	0	0	0	0	0		0	0	0	0	0	0	0		0	0	0		0
1789	14123001261	2014-12-30 09:34:43	3	0	0	0	0	0		0	0	0	0	0	0	0		0	0	0		0				32	1	16010401357	2016-01-04 10:35:48	3	0	0	0	0	0		0	0	0	0	0	0	0		0	0	0		0
1790	14123001262	2014-12-30 09:34:43	3	0	0	0	0	0		0	0	0	0	0	0	0		0	0	0		0				33	1	16010401412	2016-01-04 10:35:50	3	0	0	0	0	0		0	0	0	0	0	0	0		0	0	0		0
1791	14123001263	2014-12-30 09:34:43	3	0	0	0	0	0		0	0	0	0	0	0	0		0	0	0		0				33	1	16010401358
1792	14123001264	2014-12-30 09:34:43	3	0	0	0	0	0		0	0	0	0	0	0	0		0	0	0		0				33	1	16010401359	2016-01-04 10:35:48	3	0	0	0	0	0		0	0	0	0	0	0	0		0	0	0		0
1793	14123001265	2014-12-30 09:34:43	3	0	0	0	0	0		0	0	0	0	0	0	0		0	0	0		0				32	1
1794	14123001266	2014-12-30 09:34:43	3	0	0	0	0	0		0	0	0	0	0	0	0		0	0	0		0				33	1	16010401361	2016-01-04 10:35:48	3	0	0	0	0	0		0	0	0	0	0	0	0		0	0	0		0
1795	14123001267	2014-12-30 09:34:43	3	0	0	0	0	0		0	0	0	0	0	0	0		0	0	0		0				33	1	16010401363
1796	14123001268	2014-12-30 09:34:43	3	0	0	0	0	0		0	0	0	0	0	0	0		0	0	0		0				33	1	16010401364
1797	14123001269	2014-12-30 09:34:43	3	0	0	0	0	0		0	0	0	0	0	0	0		0	0	0		0				32	1
1798	14123001270	2014-12-30 09:34:43	3	0	0	0	0	0		0	0	0	0	0	0	0		0	0	0		0				33	1	16010401367
1799	14123001271	2014-12-30 09:34:44	3	0	0	0	0	0		0	0	0	0	0	0	0		0	0	0		0				32	1	16010401368	2016-01-04 10:35:48	3	0	0	0	0	0		0	0	0	0	0	0	0		0	0	0		0
1800	14123001272	2014-12-30 09:34:44	3	0	0	0	0	0		0	0	0	0	0	0	0		0	0	0		0				33	1	16010401369	2016-01-04 10:35:48	3	0	0	0	0	0		0	0	0	0	0	0	0		0	0	0		0
1801	16010401370	2016-01-04 10:35:48	3	0	0	0	0	0		0	0	0	0	0	0	0		0	0	0		0				33	1	16122902315	2016-12-29 13:46:53	2	0	0	0	0	0	0	0	0	0	0	0	0	0	0	0	0	0	0	0
1802	14123001274	2014-12-30 09:34:44	3	0	0	0	0	0		0	0	0	0	0	0	0		0	0	0		0				32	1	16010401371	2016-01-04 10:35:49	3	0	0	0	0	0		0	0	0	0	0	0	0		0	0	0		0
1803	14123001275	2014-12-30 09:34:44	3	0	0	0	0	0		0	0	0	0	0	0	0		0	0	0		0				33	1	16010401375	2016-01-04 10:35:49	3	0	0	0	0	0		0	0	0	0	0	0	0		0	0	0		0
1804	14123001276	2014-12-30 09:34:44	3	0	0	0	0	0		0	0	0	0	0	0	0		0	0	0		0				32	1	16010401377	2016-01-04 10:35:49	3	0	0	0	0	0		0	0	0	0	0	0	0		0	0	0		0
1805	14123001277																									32		16010401379	2016-01-04 10:35:49	3	0	0	0	0	0		0	0	0	0	0	0	0		0	0	0		0
1806	14123001278	2014-12-30 09:34:44	3	0	0	0	0	0		0	0	0	0	0	0	0		0	0	0		0				33	1	16010401381
1807	14123001279	2014-12-30 09:34:44	3	0	0	0	0	0		0	0	0	0	0	0	0		0	0	0		0				32	1	16010401383	2016-01-04 10:35:49	3	0	0	0	0	0		0	0	0	0	0	0	0		0	0	0		0
1808	14123001280	2014-12-30 09:34:44	3	0	0	0	0	0		0	0	0	0	0	0	0		0	0	0		0				33	1	16010401384	2016-01-04 10:35:49	3	0	0	0	0	0		0	0	0	0	0	0	0		0	0	0		0
1809	14123001282	2014-12-30 09:34:44	3	0	0	0	0	0		0	0	0	0	0	0	0		0	0	0		0				32	1	16010401386	2016-01-04 10:35:49	3	0	0	0	0	0		0	0	0	0	0	0	0		0	0	0		0
1810	14123001283	2014-12-30 09:34:44	3	0	0	0	0	0		0	0	0	0	0	0	0		0	0	0		0				33	1	16010401387	2016-01-04 10:35:49	3	0	0	0	0	0		0	0	0	0	0	0	0		0	0	0		0
1811	14123001284	2014-12-30 09:34:44	2	1	0	0	0	0	0	0	0	0	0	0	0	1	0	0	0	0	0	0	0	0	0	32	1	16010401388	2016-01-04 10:35:49	2	1	0	0	0	0	0	0	0	0	0	0	0	1	0	0	0	0	0	0
1812	14123001285	2014-12-30 09:34:44	3	0	0	0	0	0		0	0	0	0	0	0	0		0	0	0		0				33	1	16010401389	2016-01-04 10:35:49	3	0	0	0	0	0		0	0	0	0	0	0	0		0	0	0		0
1813	14123001286	2014-12-30 09:34:45	3	0	0	0	0	0		0	0	0	0	0	0	0		0	0	0		0				33	1	16010401390	2016-01-04 10:35:49	3	0	0	0	0	0		0	0	0	0	0	0	0		0	0	0		0
1814	14123001287	2014-12-30 09:34:45	3	0	0	0	0	0		0	0	0	0	0	0	0		0	0	0		0				33	1	16010401391	2016-01-04 10:35:49	3	0	0	0	0	0		0	0	0	0	0	0	0		0	0	0		0
1815	14123001288	2014-12-30 09:34:45	3	0	0	0	0	0		0	0	0	0	0	0	0		0	0	0		0				32	1	16010401392	2016-01-04 10:35:49	3	0	0	0	0	0		0	0	0	0	0	0	0		0	0	0		0
1816	14123001289	2014-12-30 09:34:45	3	0	0	0	0	0		0	0	0	0	0	0	0		0	0	0		0				33	1
1817	14123001290	2014-12-30 09:34:45	3	0	0	0	0	0		0	0	0	0	0	0	0		0	0	0		0				33	1	16010401395	2016-01-04 10:35:50	3	0	0	0	0	0		0	0	0	0	0	0	0		0	0	0		0
1818	14123001291	2014-12-30 09:34:45	3	0	0	0	0	0		0	0	0	0	0	0	0		0	0	0		0				33	1	16122901219	2016-12-29 13:46:06	2	0	0	0	0	0	0	0	0	0	0	0	0	0	0	0	0	0	0	0
1819	14123001293	2014-12-30 09:34:45	3	0	0	0	0	0		0	0	0	0	0	0	0		0	0	0		0				33	1	16122902045	2016-12-29 13:46:42	2	0	0	0	0	0	0	0	0	0	0	0	0	0	0	0	0	0	0	0
1820	14123001295	2014-12-30 09:34:45	3	0	0	0	0	0		0	0	0	0	0	0	0		0	0	0		0				34	1
1821	14123001296	2014-12-30 09:34:45	3	0	0	0	0	0		0	0	0	0	0	0	0		0	0	0		0				33	1	16010401402	2016-01-04 10:35:50	3	0	0	0	0	0		0	0	0	0	0	0	0		0	0	0		0
1822	14123001298																									34		16010401404	2016-01-04 10:35:50	3	0	0	0	0	0		0	0	0	0	0	0	0		0	0	0		0
1823	14123001299	2014-12-30 09:34:45	3	0	0	0	0	0		0	0	0	0	0	0	0		0	0	0		0				34	1	16010401405	2016-01-04 10:35:50	3	0	0	0	0	0		0	0	0	0	0	0	0		0	0	0		0
1824	14123001300																									34		16010401407
1825	14123001301	2014-12-30 09:34:46	2	1	0	0	0	0	0	0	0	0	0	0	0	1	0	0	0	0	0	0	0	0	0	33	1	16010401409	2016-01-04 10:35:50	3	0	0	0	0	0		0	0	0	0	0	0	0		0	0	0		0
1826	14123001302	2014-12-30 09:34:46	2	1	0	0	0	0	0	1	0	0	0	0	0	0	0	0	0	0	0	0	0	0	0	34	1	16010401411	2016-01-04 10:35:50	2	1	0	0	0	0	0	1	0	0	0	0	0	0	0	0	0	0	0	0
1827	14123001303	2014-12-30 09:34:46	3	0	0	0	0	0		0	0	0	0	0	0	0		0	0	0		0				34	1	16010401413	2016-01-04 10:35:50	3	0	0	0	0	0		0	0	0	0	0	0	0		0	0	0		0
1828	14123001304	2014-12-30 09:34:46	3	0	0	0	0	0		0	0	0	0	0	0	0		0	0	0		0				34	1	16010401414
1829	14123001305	2014-12-30 09:34:46	3	0	0	0	0	0		0	0	0	0	0	0	0		0	0	0		0				34	1	16010401464	2016-01-04 10:35:53	3	0	0	0	0	0		0	0	0	0	0	0	0		0	0	0		0
1830	14123001306	2014-12-30 09:34:46	3	0	0	0	0	0		0	0	0	0	0	0	0		0	0	0		0				34	1	16010401415	2016-01-04 10:35:50	3	0	0	0	0	0		0	0	0	0	0	0	0		0	0	0		0
1831	14123001307	2014-12-30 09:34:46	3	0	0	0	0	0		0	0	0	0	0	0	0		0	0	0		0				33	1
1832	14123001308	2014-12-30 09:34:46	3	0	0	0	0	0		0	0	0	0	0	0	0		0	0	0		0				34	1	16010401417	2016-01-04 10:35:51	3	0	0	0	0	0		0	0	0	0	0	0	0		0	0	0		0
1833	14123001309	2014-12-30 09:34:46	3	0	0	0	0	0		0	0	0	0	0	0	0		0	0	0		0				33	1	16010401418	2016-01-04 10:35:51	3	0	0	0	0	0		0	0	0	0	0	0	0		0	0	0		0
1834	14123001310	2014-12-30 09:34:46	3	0	0	0	0	0		0	0	0	0	0	0	0		0	0	0		0				34	1
1835	16010401419	2016-01-04 10:35:51	3	0	0	0	0	0		0	0	0	0	0	0	0		0	0	0		0				33	1	16122902235	2016-12-29 13:46:49	2	1	0	0	0	0	0	0	0	0	0	0	0	0	1	0	0	0	0	0
1836	14123001312	2014-12-30 09:34:46	3	0	0	0	0	0		0	0	0	0	0	0	0		0	0	0		0				34	1	16010401420	2016-01-04 10:35:51	3	0	0	0	0	0		0	0	0	0	0	0	0		0	0	0		0
1837	14123001313	2014-12-30 09:34:46	3	0	0	0	0	0		0	0	0	0	0	0	0		0	0	0		0				34	1	16122901800	2016-12-29 13:46:31	2	0	0	0	0	0	0	0	0	0	0	0	0	0	0	0	0	0	0	0
1838	14123001314	2014-12-30 09:34:46	3	0	0	0	0	0		0	0	0	0	0	0	0		0	0	0		0				34	1	16010401424
1839	14123001315	2014-12-30 09:34:47	2	1	0	0	0	0	0	0	0	0	0	0	0	0	0	0	1	0	0	0	0	0	0	33	1	16010401426	2016-01-04 10:35:51	3	0	0	0	0	0		0	0	0	0	0	0	0		0	0	0		0
1840	14123001316	2014-12-30 09:34:47	3	0	0	0	0	0		0	0	0	0	0	0	0		0	0	0		0				34	1	16010401427	2016-01-04 10:35:51	3	0	0	0	0	0		0	0	0	0	0	0	0		0	0	0		0
1841	14123001317	2014-12-30 09:34:47	3	0	0	0	0	0		0	0	0	0	0	0	0		0	0	0		0				34	1	16010401428	2016-01-04 10:35:51	3	0	0	0	0	0		0	0	0	0	0	0	0		0	0	0		0
1842	14123001318	2014-12-30 09:34:47	2	1	0	0	1	0	0	0	0	0	0	0	0	0	0	0	0	0	0	0	0	0	0	33	1	16010401429	2016-01-04 10:35:51	3	0	0	0	0	0		0	0	0	0	0	0	0		0	0	0		0
1843	14123001319	2014-12-30 09:34:47	3	0	0	0	0	0		0	0	0	0	0	0	0		0	0	0		0				33	1	16010401431	2016-01-04 10:35:51	3	0	0	0	0	0		0	0	0	0	0	0	0		0	0	0		0
1844	16010401432	2016-01-04 10:35:51	3	0	0	0	0	0		0	0	0	0	0	0	0		0	0	0		0				34	1	16122902112	2016-12-29 13:46:44	2	0	0	0	0	0	0	0	0	0	0	0	0	0	0	0	0	0	0	0
1845	14123001322	2014-12-30 09:34:47	3	0	0	0	0	0		0	0	0	0	0	0	0		0	0	0		0				34	1	16010401433
1846	14123001323	2014-12-30 09:34:47	3	0	0	0	0	0		0	0	0	0	0	0	0		0	0	0		0				34	1	16010401434	2016-01-04 10:35:52	3	0	0	0	0	0		0	0	0	0	0	0	0		0	0	0		0
1847	14123001324	2014-12-30 09:34:47	3	0	0	0	0	0		0	0	0	0	0	0	0		0	0	0		0				33	1	16010401435	2016-01-04 10:35:52	3	0	0	0	0	0		0	0	0	0	0	0	0		0	0	0		0
1848	14123001325	2014-12-30 09:34:47	3	0	0	0	0	0		0	0	0	0	0	0	0		0	0	0		0				34	1	16010401436	2016-01-04 10:35:52	3	0	0	0	0	0		0	0	0	0	0	0	0		0	0	0		0
1849	14123001326	2014-12-30 09:34:47	3	0	0	0	0	0		0	0	0	0	0	0	0		0	0	0		0				34	1	16010401437	2016-01-04 10:35:52	3	0	0	0	0	0		0	0	0	0	0	0	0		0	0	0		0
1850	14123001327	2014-12-30 09:34:47	3	0	0	0	0	0		0	0	0	0	0	0	0		0	0	0		0				34	1	16010401438	2016-01-04 10:35:52	3	0	0	0	0	0		0	0	0	0	0	0	0		0	0	0		0
1851	16010401440	2016-01-04 10:35:52	3	0	0	0	0	0		0	0	0	0	0	0	0		0	0	0		0				33	1	16122901502	2016-12-29 13:46:19	2	0	0	0	0	0	0	0	0	0	0	0	0	0	0	0	0	0	0	0
1852	14123001329	2014-12-30 09:34:47	3	0	0	0	0	0		0	0	0	0	0	0	0		0	0	0		0				34	1	16010401441	2016-01-04 10:35:52	3	0	0	0	0	0		0	0	0	0	0	0	0		0	0	0		0
1853	14123001330	2014-12-30 09:34:48	3	0	0	0	0	0		0	0	0	0	0	0	0		0	0	0		0				35	1	16010401443	2016-01-04 10:35:52	3	0	0	0	0	0		0	0	0	0	0	0	0		0	0	0		0
1854	14123001331	2014-12-30 09:34:48	3	0	0	0	0	0		0	0	0	0	0	0	0		0	0	0		0				34	1	16010401444	2016-01-04 10:35:52	3	0	0	0	0	0		0	0	0	0	0	0	0		0	0	0		0
1855	16010401445																									34		16122902096	2016-12-29 13:46:44	2	0	0	0	0	0	0	0	0	0	0	0	0	0	0	0	0	0	0	0
1856	14123001333	2014-12-30 09:34:48	3	0	0	0	0	0		0	0	0	0	0	0	0		0	0	0		0				35	1	16122901532	2016-12-29 13:46:20	2	0	0	0	0	0	0	0	0	0	0	0	0	0	0	0	0	0	0	0
1857	14123001335	2014-12-30 09:34:49	3	0	0	0	0	0		0	0	0	0	0	0	0		0	0	0		0				35	1	16010401452	2016-01-04 10:35:52	3	0	0	0	0	0		0	0	0	0	0	0	0		0	0	0		0
1858	14123001337	2014-12-30 09:34:49	3	0	0	0	0	0		0	0	0	0	0	0	0		0	0	0		0				34	1	16010401125	2016-01-04 10:35:37	3	0	0	0	0	0		0	0	0	0	0	0	0		0	0	0		0
1859	14123001338	2014-12-30 09:34:49	3	0	0	0	0	0		0	0	0	0	0	0	0		0	0	0		0				35	1	16010401455	2016-01-04 10:35:52	3	0	0	0	0	0		0	0	0	0	0	0	0		0	0	0		0
1860	14123001339	2014-12-30 09:34:49	3	0	0	0	0	0		0	0	0	0	0	0	0		0	0	0		0				34	1	16010401456	2016-01-04 10:35:52	3	0	0	0	0	0		0	0	0	0	0	0	0		0	0	0		0
1861	14123001341	2014-12-30 09:34:49	3	0	0	0	0	0		0	0	0	0	0	0	0		0	0	0		0				34	1
1862	14123001342	2014-12-30 09:34:49	3	0	0	0	0	0		0	0	0	0	0	0	0		0	0	0		0				35	1	16010401459
1863	14123001344	2014-12-30 09:34:49	3	0	0	0	0	0		0	0	0	0	0	0	0		0	0	0		0				35	1	16122900963	2016-12-29 13:45:55	2	0	0	0	0	0	0	0	0	0	0	0	0	0	0	0	0	0	0	0
1864	14123001345	2014-12-30 09:34:49	3	0	0	0	0	0		0	0	0	0	0	0	0		0	0	0		0				35	1	16010401465	2016-01-04 10:35:53	3	0	0	0	0	0		0	0	0	0	0	0	0		0	0	0		0
1865	14123001346																									35		16010401466	2016-01-04 10:35:53	3	0	0	0	0	0		0	0	0	0	0	0	0		0	0	0		0
1866	14123001347	2014-12-30 09:34:49	3	0	0	0	0	0		0	0	0	0	0	0	0		0	0	0		0				35	1	16010401467	2016-01-04 10:35:53	3	0	0	0	0	0		0	0	0	0	0	0	0		0	0	0		0
1867	14123001348	2014-12-30 09:34:49	3	0	0	0	0	0		0	0	0	0	0	0	0		0	0	0		0				34	1	16010401126	2016-01-04 10:35:37	3	0	0	0	0	0		0	0	0	0	0	0	0		0	0	0		0
1868	14123001349	2014-12-30 09:34:49	3	0	0	0	0	0		0	0	0	0	0	0	0		0	0	0		0				35	1	16010401469	2016-01-04 10:35:53	3	0	0	0	0	0		0	0	0	0	0	0	0		0	0	0		0
1869	14123001350	2014-12-30 09:34:50	3	0	0	0	0	0		0	0	0	0	0	0	0		0	0	0		0				35	1	16010401470	2016-01-04 10:35:53	3	0	0	0	0	0		0	0	0	0	0	0	0		0	0	0		0
1870	14123001351	2014-12-30 09:34:50	3	0	0	0	0	0		0	0	0	0	0	0	0		0	0	0		0				34	1	16010401471	2016-01-04 10:35:53	3	0	0	0	0	0		0	0	0	0	0	0	0		0	0	0		0
1871	14123001352	2014-12-30 09:34:50	3	0	0	0	0	0		0	0	0	0	0	0	0		0	0	0		0				34	1	16010401472	2016-01-04 10:35:53	3	0	0	0	0	0		0	0	0	0	0	0	0		0	0	0		0
1872	14123001353	2014-12-30 09:34:50	3	0	0	0	0	0		0	0	0	0	0	0	0		0	0	0		0				34	1	16010401473	2016-01-04 10:35:53	3	0	0	0	0	0		0	0	0	0	0	0	0		0	0	0		0
1873	14123001354	2014-12-30 09:34:50	3	0	0	0	0	0		0	0	0	0	0	0	0		0	0	0		0				34	1	16122902155	2016-12-29 13:46:46	2	0	0	0	0	0	0	0	0	0	0	0	0	0	0	0	0	0	0	0
1874	14123001355	2014-12-30 09:34:50	2	1	0	0	0	0	0	0	0	0	0	0	0	1	0	0	0	0	0	0	0	0	0	34	1
1875	14123001356	2014-12-30 09:34:50	3	0	0	0	0	0		0	0	0	0	0	0	0		0	0	0		0				35	1	16010401475
1876	14123001357	2014-12-30 09:34:50	3	0	0	0	0	0		0	0	0	0	0	0	0		0	0	0		0				35	1
1877	14123001358	2014-12-30 09:34:50	3	0	0	0	0	0		0	0	0	0	0	0	0		0	0	0		0				35	1	16010401476	2016-01-04 10:35:53	3	0	0	0	0	0		0	0	0	0	0	0	0		0	0	0		0
1878	14123001359	2014-12-30 09:34:50	3	0	0	0	0	0		0	0	0	0	0	0	0		0	0	0		0				35	1	16010401477	2016-01-04 10:35:53	3	0	0	0	0	0		0	0	0	0	0	0	0		0	0	0		0
1879	14123001360	2014-12-30 09:34:50	3	0	0	0	0	0		0	0	0	0	0	0	0		0	0	0		0				35	1	16010401478	2016-01-04 10:35:53	3	0	0	0	0	0		0	0	0	0	0	0	0		0	0	0		0
1880	14123001361	2014-12-30 09:34:50	3	0	0	0	0	0		0	0	0	0	0	0	0		0	0	0		0				34	1	16010401479	2016-01-04 10:35:53	3	0	0	0	0	0		0	0	0	0	0	0	0		0	0	0		0
1881	14123001362	2014-12-30 09:34:50	3	0	0	0	0	0		0	0	0	0	0	0	0		0	0	0		0				35	1	16010401480	2016-01-04 10:35:53	3	0	0	0	0	0		0	0	0	0	0	0	0		0	0	0		0
1882	14123001363	2014-12-30 09:34:50	3	0	0	0	0	0		0	0	0	0	0	0	0		0	0	0		0				35	1	16122901591	2016-12-29 13:46:23	2	0	0	0	0	0	0	0	0	0	0	0	0	0	0	0	0	0	0	0
1883	14123001364	2014-12-30 09:34:50	3	0	0	0	0	0		0	0	0	0	0	0	0		0	0	0		0				35	1	16010401128	2016-01-04 10:35:37	3	0	0	0	0	0		0	0	0	0	0	0	0		0	0	0		0
1884	14123001365																									35		16010401483	2016-01-04 10:35:54	3	0	0	0	0	0		0	0	0	0	0	0	0		0	0	0		0
1885	14123001366	2014-12-30 09:34:51	3	0	0	0	0	0		0	0	0	0	0	0	0		0	0	0		0				35	1	16122901459	2016-12-29 13:46:17	2	0	0	0	0	0	0	0	0	0	0	0	0	0	0	0	0	0	0	0
1886	14123001367	2014-12-30 09:34:51	3	0	0	0	0	0		0	0	0	0	0	0	0		0	0	0		0				35	1	16010401485	2016-01-04 10:35:54	3	0	0	0	0	0		0	0	0	0	0	0	0		0	0	0		0
1887	14123001368	2014-12-30 09:34:51	3	0	0	0	0	0		0	0	0	0	0	0	0		0	0	0		0				34	1	16010401486	2016-01-04 10:35:54	3	0	0	0	0	0		0	0	0	0	0	0	0		0	0	0		0
1888	14123001369	2014-12-30 09:34:51	3	0	0	0	0	0		0	0	0	0	0	0	0		0	0	0		0				35	1	16010401487	2016-01-04 10:35:54	3	0	0	0	0	0		0	0	0	0	0	0	0		0	0	0		0
1889	14123001370	2014-12-30 09:34:51	3	0	0	0	0	0		0	0	0	0	0	0	0		0	0	0		0				35	1	16010401488	2016-01-04 10:35:54	3	0	0	0	0	0		0	0	0	0	0	0	0		0	0	0		0
1890	14123001371	2014-12-30 09:34:51	3	0	0	0	0	0		0	0	0	0	0	0	0		0	0	0		0				34	1	16010401489	2016-01-04 10:35:54	3	0	0	0	0	0		0	0	0	0	0	0	0		0	0	0		0
1891	14123001372	2014-12-30 09:34:51	3	0	0	0	0	0		0	0	0	0	0	0	0		0	0	0		0				35	1	16010401490	2016-01-04 10:35:54	3	0	0	0	0	0		0	0	0	0	0	0	0		0	0	0		0
1892	14123001373	2014-12-30 09:34:51	3	0	0	0	0	0		0	0	0	0	0	0	0		0	0	0		0				34	1	16010401492
1893	14123001374	2014-12-30 09:34:51	3	0	0	0	0	0		0	0	0	0	0	0	0		0	0	0		0				35	1	16010401493	2016-01-04 10:35:54	3	0	0	0	0	0		0	0	0	0	0	0	0		0	0	0		0
1894	14123001376	2014-12-30 09:34:51	3	0	0	0	0	0		0	0	0	0	0	0	0		0	0	0		0				35	1	16010401498	2016-01-04 10:35:54	3	0	0	0	0	0		0	0	0	0	0	0	0		0	0	0		0
1895	14123001377	2014-12-30 09:34:51	3	0	0	0	0	0		0	0	0	0	0	0	0		0	0	0		0				35	1	16010401499	2016-01-04 10:35:54	3	0	0	0	0	0		0	0	0	0	0	0	0		0	0	0		0
1896	14123001378																									35		16010401500	2016-01-04 10:35:54	3	0	0	0	0	0		0	0	0	0	0	0	0		0	0	0		0
1897	14123001379	2014-12-30 09:34:51	3	0	0	0	0	0		0	0	0	0	0	0	0		0	0	0		0				35	1	16010401501	2016-01-04 10:35:54	3	0	0	0	0	0		0	0	0	0	0	0	0		0	0	0		0
1898	14123001380	2014-12-30 09:34:52	3	0	0	0	0	0		0	0	0	0	0	0	0		0	0	0		0				35	1	16010401567	2016-01-04 10:35:57	3	0	0	0	0	0		0	0	0	0	0	0	0		0	0	0		0
1899	14123001381																									35		16010401502	2016-01-04 10:35:54	3	0	0	0	0	0		0	0	0	0	0	0	0		0	0	0		0
1900	14123001382	2014-12-30 09:34:52	3	0	0	0	0	0		0	0	0	0	0	0	0		0	0	0		0				35	1	16010401503	2016-01-04 10:35:54	3	0	0	0	0	0		0	0	0	0	0	0	0		0	0	0		0
1901	14123001383	2014-12-30 09:34:52	3	0	0	0	0	0		0	0	0	0	0	0	0		0	0	0		0				34	1
1902	14123001384	2014-12-30 09:34:52	3	0	0	0	0	0		0	0	0	0	0	0	0		0	0	0		0				34	1	16010401505	2016-01-04 10:35:54	3	0	0	0	0	0		0	0	0	0	0	0	0		0	0	0		0
1903	14123001385	2014-12-30 09:34:52	3	0	0	0	0	0		0	0	0	0	0	0	0		0	0	0		0				35	1	16010401506	2016-01-04 10:35:54	3	0	0	0	0	0		0	0	0	0	0	0	0		0	0	0		0
1904	14123001386																									35		16010401507	2016-01-04 10:35:54	3	0	0	0	0	0		0	0	0	0	0	0	0		0	0	0		0
1905	14123001387	2014-12-30 09:34:52	3	0	0	0	0	0		0	0	0	0	0	0	0		0	0	0		0				36	1	16010401508	2016-01-04 10:35:55	3	0	0	0	0	0		0	0	0	0	0	0	0		0	0	0		0
1906	14123001388	2014-12-30 09:34:52	3	0	0	0	0	0		0	0	0	0	0	0	0		0	0	0		0				36	1	16010401509
1907	14123001390	2014-12-30 09:34:52	3	0	0	0	0	0		0	0	0	0	0	0	0		0	0	0		0				36	1	16010401512
1908	14123001391	2014-12-30 09:34:52	2	1	0	0	1	0	0	1	1	0	0	0	0	0	0	0	0	0	0	0	0	0	0	36	1	16010401513	2016-01-04 10:35:55	2	1	0	0	0	1	0	0	0	0	0	0	0	0	0	0	0	0	0	0
1909	14123001392	2014-12-30 09:34:52	2	1	0	0	0	0	0	0	0	0	0	0	0	0	0	0	0	1	0	0	0	0	0	35	1
1910	14123001393	2014-12-30 09:34:52	3	0	0	0	0	0		0	0	0	0	0	0	0		0	0	0		0				35	1	16010401515	2016-01-04 10:35:55	3	0	0	0	0	0		0	0	0	0	0	0	0		0	0	0		0
1911	14123001394	2014-12-30 09:34:52	3	0	0	0	0	0		0	0	0	0	0	0	0		0	0	0		0				36	1	16010401516	2016-01-04 10:35:55	3	0	0	0	0	0		0	0	0	0	0	0	0		0	0	0		0
1912	14123001395	2014-12-30 09:34:52	3	0	0	0	0	0		0	0	0	0	0	0	0		0	0	0		0				35	1	16010401129	2016-01-04 10:35:37	3	0	0	0	0	0		0	0	0	0	0	0	0		0	0	0		0
1913	14123001396	2014-12-30 09:34:53	3	0	0	0	0	0		0	0	0	0	0	0	0		0	0	0		0				36	1	16122900767
1914	14123001397	2014-12-30 09:34:53	3	0	0	0	0	0		0	0	0	0	0	0	0		0	0	0		0				36	1	16010401519	2016-01-04 10:35:55	3	0	0	0	0	0		0	0	0	0	0	0	0		0	0	0		0
1915	14123001398	2014-12-30 09:34:53	3	0	0	0	0	0		0	0	0	0	0	0	0		0	0	0		0				35	1	16010401522	2016-01-04 10:35:55	3	0	0	0	0	0		0	0	0	0	0	0	0		0	0	0		0
1916	14123001399	2014-12-30 09:34:53	3	0	0	0	0	0		0	0	0	0	0	0	0		0	0	0		0				35	1	16010401523	2016-01-04 10:35:55	3	0	0	0	0	0		0	0	0	0	0	0	0		0	0	0		0
1917	14123001400	2014-12-30 09:34:53	3	0	0	0	0	0		0	0	0	0	0	0	0		0	0	0		0				36	1	16010401524	2016-01-04 10:35:55	3	0	0	0	0	0		0	0	0	0	0	0	0		0	0	0		0
1918	14123001401	2014-12-30 09:34:53	3	0	0	0	0	0		0	0	0	0	0	0	0		0	0	0		0				36	1	16010401526	2016-01-04 10:35:55	3	0	0	0	0	0		0	0	0	0	0	0	0		0	0	0		0
1919	14123001402	2014-12-30 09:34:53	3	0	0	0	0	0		0	0	0	0	0	0	0		0	0	0		0				36	1	16010401584	2016-01-04 10:35:58	3	0	0	0	0	0		0	0	0	0	0	0	0		0	0	0		0
1920	14123001403	2014-12-30 09:34:53	3	0	0	0	0	0		0	0	0	0	0	0	0		0	0	0		0				36	1	16010401530	2016-01-04 10:35:55	3	0	0	0	0	0		0	0	0	0	0	0	0		0	0	0		0
1921	14123001404	2014-12-30 09:34:53	3	0	0	0	0	0		0	0	0	0	0	0	0		0	0	0		0				36	1	16010401130	2016-01-04 10:35:37	3	0	0	0	0	0		0	0	0	0	0	0	0		0	0	0		0
1922	14123001405	2014-12-30 09:34:53	3	0	0	0	0	0		0	0	0	0	0	0	0		0	0	0		0				36	1	16010401533	2016-01-04 10:35:56	3	0	0	0	0	0		0	0	0	0	0	0	0		0	0	0		0
1923	14123001406	2014-12-30 09:34:53	3	0	0	0	0	0		0	0	0	0	0	0	0		0	0	0		0				36	1	16010401592	2016-01-04 10:35:58	3	0	0	0	0	0		0	0	0	0	0	0	0		0	0	0		0
1924	14123001407	2014-12-30 09:34:53	3	0	0	0	0	0		0	0	0	0	0	0	0		0	0	0		0				36	1	16010401535	2016-01-04 10:35:56	3	0	0	0	0	0		0	0	0	0	0	0	0		0	0	0		0
1925	14123001408	2014-12-30 09:34:53	3	0	0	0	0	0		0	0	0	0	0	0	0		0	0	0		0				35	1	16010401536	2016-01-04 10:35:56	3	0	0	0	0	0		0	0	0	0	0	0	0		0	0	0		0
1926	14123001409	2014-12-30 09:34:53	3	0	0	0	0	0		0	0	0	0	0	0	0		0	0	0		0				36	1	16010401537	2016-01-04 10:35:56	3	0	0	0	0	0		0	0	0	0	0	0	0		0	0	0		0
1927	14123001410	2014-12-30 09:34:53	3	0	0	0	0	0		0	0	0	0	0	0	0		0	0	0		0				36	1	16010401538	2016-01-04 10:35:56	3	0	0	0	0	0		0	0	0	0	0	0	0		0	0	0		0
1928	14123001411	2014-12-30 09:34:54	3	0	0	0	0	0		0	0	0	0	0	0	0		0	0	0		0				35	1	16010401539	2016-01-04 10:35:56	3	0	0	0	0	0		0	0	0	0	0	0	0		0	0	0		0
1929	14123001412	2014-12-30 09:34:54	2	1	0	0	0	1	0	0	0	0	0	0	0	0	0	0	0	0	0	0	0	0	0	36	1	16010401540	2016-01-04 10:35:56	3	0	0	0	0	0		0	0	0	0	0	0	0		0	0	0		0
1930	14123001413	2014-12-30 09:34:54	3	0	0	0	0	0		0	0	0	0	0	0	0		0	0	0		0				35	1	16010401542	2016-01-04 10:35:56	3	0	0	0	0	0		0	0	0	0	0	0	0		0	0	0		0
1931	14123001414	2014-12-30 09:34:54	3	0	0	0	0	0		0	0	0	0	0	0	0		0	0	0		0				36	1	16010401543	2016-01-04 10:35:56	3	0	0	0	0	0		0	0	0	0	0	0	0		0	0	0		0
1932	14123001415	2014-12-30 09:34:54	3	0	0	0	0	0		0	0	0	0	0	0	0		0	0	0		0				36	1
1933	14123001416																									35		16010401544
1934	14123001417	2014-12-30 09:34:54	3	0	0	0	0	0		0	0	0	0	0	0	0		0	0	0		0				36	1	16010401546	2016-01-04 10:35:56	3	0	0	0	0	0		0	0	0	0	0	0	0		0	0	0		0
1935	14123001418	2014-12-30 09:34:54	3	0	0	0	0	0		0	0	0	0	0	0	0		0	0	0		0				36	1
1936	14123001419	2014-12-30 09:34:54	3	0	0	0	0	0		0	0	0	0	0	0	0		0	0	0		0				35	1	16010401547	2016-01-04 10:35:56	3	0	0	0	0	0		0	0	0	0	0	0	0		0	0	0		0
1937	14123001420	2014-12-30 09:34:54	3	0	0	0	0	0		0	0	0	0	0	0	0		0	0	0		0				35	1	16010401548	2016-01-04 10:35:56	3	0	0	0	0	0		0	0	0	0	0	0	0		0	0	0		0
1938	14123001421	2014-12-30 09:34:54	3	0	0	0	0	0		0	0	0	0	0	0	0		0	0	0		0				36	1	16010401549	2016-01-04 10:35:56	3	0	0	0	0	0		0	0	0	0	0	0	0		0	0	0		0
1939	14123001422	2014-12-30 09:34:54	3	0	0	0	0	0		0	0	0	0	0	0	0		0	0	0		0				35	1	16010401550	2016-01-04 10:35:56	3	0	0	0	0	0		0	0	0	0	0	0	0		0	0	0		0
1940	14123001423	2014-12-30 09:34:54	3	0	0	0	0	0		0	0	0	0	0	0	0		0	0	0		0				36	1	16010401606	2016-01-04 10:35:59	3	0	0	0	0	0		0	0	0	0	0	0	0		0	0	0		0
1941	14123001424	2014-12-30 09:34:54	3	0	0	0	0	0		0	0	0	0	0	0	0		0	0	0		0				36	1	16010401608	2016-01-04 10:35:59	3	0	0	0	0	0		0	0	0	0	0	0	0		0	0	0		0
1942	14123001425	2014-12-30 09:34:55	3	0	0	0	0	0		0	0	0	0	0	0	0		0	0	0		0				36	1	16010401551
1943	14123001426	2014-12-30 09:34:55	3	0	0	0	0	0		0	0	0	0	0	0	0		0	0	0		0				36	1	16010401552	2016-01-04 10:35:57	3	0	0	0	0	0		0	0	0	0	0	0	0		0	0	0		0
1944	14123001427																									35		16010401553	2016-01-04 10:35:57	3	0	0	0	0	0		0	0	0	0	0	0	0		0	0	0		0
1945	14123001428	2014-12-30 09:34:55	3	0	0	0	0	0		0	0	0	0	0	0	0		0	0	0		0				36	1	16010401554	2016-01-04 10:35:57	2	1	0	1	0	0	0	0	0	0	0	0	0	0	0	0	0	0	0	0
1946	14123001429	2014-12-30 09:34:55	3	0	0	0	0	0		0	0	0	0	0	0	0		0	0	0		0				36	1	16010401555	2016-01-04 10:35:57	3	0	0	0	0	0		0	0	0	0	0	0	0		0	0	0		0
1947	14123001430	2014-12-30 09:34:56	3	0	0	0	0	0		0	0	0	0	0	0	0		0	0	0		0				35	1	16010401131	2016-01-04 10:35:38	3	0	0	0	0	0		0	0	0	0	0	0	0		0	0	0		0
1948	14123001431	2014-12-30 09:34:56	3	0	0	0	0	0		0	0	0	0	0	0	0		0	0	0		0				35	1	16010401556	2016-01-04 10:35:57	3	0	0	0	0	0		0	0	0	0	0	0	0		0	0	0		0
1949	16010401557	2016-01-04 10:35:57	3	0	0	0	0	0		0	0	0	0	0	0	0		0	0	0		0				35	1
1950	14123001433	2014-12-30 09:34:56	2	1	0	0	0	0	0	0	0	0	0	0	0	0	0	0	1	0	0	1	0	0	0	35	1	16010401132	2016-01-04 10:35:38	2	1	0	0	0	0	0	0	0	0	0	0	0	0	0	0	1	0	0	0
1951	15061800058	2015-06-18 15:04:49	3	0	0	0	0	0		0	0	0	0	0	0	0		0	0	0		0				36	1
1952	14123001435	2014-12-30 09:34:56	2	1	0	0	0	0	0	0	0	0	0	0	1	0	0	0	0	0	0	0	0	0	0	36	1	16010401560	2016-01-04 10:35:57	3	0	0	0	0	0		0	0	0	0	0	0	0		0	0	0		0
1953	14123001436	2014-12-30 09:34:56	3	0	0	0	0	0		0	0	0	0	0	0	0		0	0	0		0				35	1	16010401564	2016-01-04 10:35:57	3	0	0	0	0	0		0	0	0	0	0	0	0		0	0	0		0
1954	14123001437	2014-12-30 09:34:56	3	0	0	0	0	0		0	0	0	0	0	0	0		0	0	0		0				36	1	16010401565
1955	14123001438	2014-12-30 09:34:56	3	0	0	0	0	0		0	0	0	0	0	0	0		0	0	0		0				36	1	16010401566	2016-01-04 10:35:57	3	0	0	0	0	0		0	0	0	0	0	0	0		0	0	0		0
1956	14123001439	2014-12-30 09:34:56	3	0	0	0	0	0		0	0	0	0	0	0	0		0	0	0		0				36	1	16010401621	2016-01-04 10:35:59	3	0	0	0	0	0		0	0	0	0	0	0	0		0	0	0		0
1957	14123001440	2014-12-30 09:34:56	3	0	0	0	0	0		0	0	0	0	0	0	0		0	0	0		0				37	1
1958	14123001441																									37		16010401568	2016-01-04 10:35:57	3	0	0	0	0	0		0	0	0	0	0	0	0		0	0	0		0
1959	14123001442	2014-12-30 09:34:57	2	1	0	0	0	0	0	0	0	0	0	0	1	0	0	1	1	0	0	0	0	0	0	36	1	16010401569	2016-01-04 10:35:57	2	1	0	0	1	0	0	0	0	0	0	0	0	0	0	0	1	0	0	0
1960	14123001443	2014-12-30 09:34:57	3	0	0	0	0	0		0	0	0	0	0	0	0		0	0	0		0				37	1	16010401570	2016-01-04 10:35:57	3	0	0	0	0	0		0	0	0	0	0	0	0		0	0	0		0
1961	14123001444	2014-12-30 09:34:57	3	0	0	0	0	0		0	0	0	0	0	0	0		0	0	0		0				37	1
1962	14123001445	2014-12-30 09:34:57	3	0	0	0	0	0		0	0	0	0	0	0	0		0	0	0		0				36	1	16010401571	2016-01-04 10:35:57	3	0	0	0	0	0		0	0	0	0	0	0	0		0	0	0		0
1963	14123001446	2014-12-30 09:34:57	3	0	0	0	0	0		0	0	0	0	0	0	0		0	0	0		0				37	1	16010401573	2016-01-04 10:35:57	3	0	0	0	0	0		0	0	0	0	0	0	0		0	0	0		0
1964	14123001447	2014-12-30 09:34:57	3	0	0	0	0	0		0	0	0	0	0	0	0		0	0	0		0				36	1	16010401574	2016-01-04 10:35:57	3	0	0	0	0	0		0	0	0	0	0	0	0		0	0	0		0
1965	14123001448	2014-12-30 09:34:57	3	0	0	0	0	0		0	0	0	0	0	0	0		0	0	0		0				36	1	16010401576	2016-01-04 10:35:57	3	0	0	0	0	0		0	0	0	0	0	0	0		0	0	0		0
1966	14123001449	2014-12-30 09:34:57	3	0	0	0	0	0		0	0	0	0	0	0	0		0	0	0		0				36	1	16010401577	2016-01-04 10:35:58	3	0	0	0	0	0		0	0	0	0	0	0	0		0	0	0		0
1967	14123001450	2014-12-30 09:34:57	3	0	0	0	0	0		0	0	0	0	0	0	0		0	0	0		0				37	1	16122902280	2016-12-29 13:46:52	2	0	0	0	0	0	0	0	0	0	0	0	0	0	0	0	0	0	0	0
1968	14123001451	2014-12-30 09:34:57	3	0	0	0	0	0		0	0	0	0	0	0	0		0	0	0		0				37	1	16010401580	2016-01-04 10:35:58	3	0	0	0	0	0		0	0	0	0	0	0	0		0	0	0		0
1969	14123001452	2014-12-30 09:34:57	3	0	0	0	0	0		0	0	0	0	0	0	0		0	0	0		0				36	1	16010401582	2016-01-04 10:35:58	3	0	0	0	0	0		0	0	0	0	0	0	0		0	0	0		0
1970	14123001453	2014-12-30 09:34:57	2	1	0	0	0	0	0	0	0	0	0	0	0	0	0	0	0	0	0	1	0	0	0	36	1	16010401583	2016-01-04 10:35:58	3	0	0	0	0	0		0	0	0	0	0	0	0		0	0	0		0
1971	14123001454	2014-12-30 09:34:57	3	0	0	0	0	0		0	0	0	0	0	0	0		0	0	0		0				36	1	16010401585
1972	14123001455	2014-12-30 09:34:57	3	0	0	0	0	0		0	0	0	0	0	0	0		0	0	0		0				37	1	16010401587	2016-01-04 10:35:58	3	0	0	0	0	0		0	0	0	0	0	0	0		0	0	0		0
1973	14123001456	2014-12-30 09:34:57	3	0	0	0	0	0		0	0	0	0	0	0	0		0	0	0		0				36	1	16010401588	2016-01-04 10:35:58	3	0	0	0	0	0		0	0	0	0	0	0	0		0	0	0		0
1974	14123001457	2014-12-30 09:34:57	3	0	0	0	0	0		0	0	0	0	0	0	0		0	0	0		0				37	1	16010401589	2016-01-04 10:35:58	3	0	0	0	0	0		0	0	0	0	0	0	0		0	0	0		0
1975	14123001458	2014-12-30 09:34:58	3	0	0	0	0	0		0	0	0	0	0	0	0		0	0	0		0				37	1	16010401591	2016-01-04 10:35:58	3	0	0	0	0	0		0	0	0	0	0	0	0		0	0	0		0
1976	14123001459	2014-12-30 09:34:58	3	0	0	0	0	0		0	0	0	0	0	0	0		0	0	0		0				36	1	16010401593	2016-01-04 10:35:58	3	0	0	0	0	0		0	0	0	0	0	0	0		0	0	0		0
1977	14123001460	2014-12-30 09:34:58	3	0	0	0	0	0		0	0	0	0	0	0	0		0	0	0		0				36	1	16010401594	2016-01-04 10:35:58	3	0	0	0	0	0		0	0	0	0	0	0	0		0	0	0		0
1978	14123001461	2014-12-30 09:34:58	3	0	0	0	0	0		0	0	0	0	0	0	0		0	0	0		0				37	1
1979	16010401596	2016-01-04 10:35:58	3	0	0	0	0	0		0	0	0	0	0	0	0		0	0	0		0				36	1	16122902078	2016-12-29 13:46:43	2	0	0	0	0	0	0	0	0	0	0	0	0	0	0	0	0	0	0	0
1980	14123001463	2014-12-30 09:34:58	3	0	0	0	0	0		0	0	0	0	0	0	0		0	0	0		0				36	1	16122901746	2016-12-29 13:46:29	2	0	0	0	0	0	0	0	0	0	0	0	0	0	0	0	0	0	0	0
1981	14123001464	2014-12-30 09:34:58	2	1	0	0	0	0	0	0	1	0	0	0	0	0	0	0	0	0	0	0	0	0	0	37	1	16010401599	2016-01-04 10:35:58	3	0	0	0	0	0		0	0	0	0	0	0	0		0	0	0		0
1982	14123001465	2014-12-30 09:34:58	3	0	0	0	0	0		0	0	0	0	0	0	0		0	0	0		0				37	1	16010401600	2016-01-04 10:35:58	3	0	0	0	0	0		0	0	0	0	0	0	0		0	0	0		0
1983	14123001466	2014-12-30 09:34:58	3	0	0	0	0	0		0	0	0	0	0	0	0		0	0	0		0				36	1	16010401603	2016-01-04 10:35:59	3	0	0	0	0	0		0	0	0	0	0	0	0		0	0	0		0
1984	14123001467	2014-12-30 09:34:58	3	0	0	0	0	0		0	0	0	0	0	0	0		0	0	0		0				37	1	16010401604	2016-01-04 10:35:59	3	0	0	0	0	0		0	0	0	0	0	0	0		0	0	0		0
1985	14123001468																									37		16010401607
1986	14123001469	2014-12-30 09:34:58	3	0	0	0	0	0		0	0	0	0	0	0	0		0	0	0		0				36	1	16010401612	2016-01-04 10:35:59	3	0	0	0	0	0		0	0	0	0	0	0	0		0	0	0		0
1987	14123001470	2014-12-30 09:34:58	3	0	0	0	0	0		0	0	0	0	0	0	0		0	0	0		0				37	1	16010401614	2016-01-04 10:35:59	3	0	0	0	0	0		0	0	0	0	0	0	0		0	0	0		0
1988	14123001471																									37		16010401615	2016-01-04 10:35:59	2	1	0	0	0	0	0	0	0	0	0	0	0	0	0	0	1	0	0	0
1989	14123001472	2014-12-30 09:34:58	3	0	0	0	0	0		0	0	0	0	0	0	0		0	0	0		0				36	1	16010401618	2016-01-04 10:35:59	3	0	0	0	0	0		0	0	0	0	0	0	0		0	0	0		0
1990	14123001473	2014-12-30 09:34:58	3	0	0	0	0	0		0	0	0	0	0	0	0		0	0	0		0				37	1
1991	14123001474	2014-12-30 09:34:59	3	0	0	0	0	0		0	0	0	0	0	0	0		0	0	0		0				37	1	16010401620
1992	14123001475	2014-12-30 09:34:59	2	1	0	0	0	0	0	0	0	0	0	0	1	0	0	0	0	0	0	0	0	0	0	38	1
1993	14123001476	2014-12-30 09:34:59	3	0	0	0	0	0		0	0	0	0	0	0	0		0	0	0		0				38	1	16010401625	2016-01-04 10:35:59	2	1	0	0	1	0	0	1	1	0	0	0	0	0	0	0	0	0	0	0
1994	14123001477	2014-12-30 09:34:59	3	0	0	0	0	0		0	0	0	0	0	0	0		0	0	0		0				38	1	16010401627
1995	14123001478	2014-12-30 09:34:59	3	0	0	0	0	0		0	0	0	0	0	0	0		0	0	0		0				38	1	16010401628	2016-01-04 10:36:00	3	0	0	0	0	0		0	0	0	0	0	0	0		0	0	0		0
1996	14123001479	2014-12-30 09:34:59	3	0	0	0	0	0		0	0	0	0	0	0	0		0	0	0		0				37	1	16010401629	2016-01-04 10:36:00	3	0	0	0	0	0		0	0	0	0	0	0	0		0	0	0		0
1997	14123001480	2014-12-30 09:34:59	3	0	0	0	0	0		0	0	0	0	0	0	0		0	0	0		0				37	1	16010401631	2016-01-04 10:36:00	2	1	1	0	0	0	0	0	0	0	0	0	0	0	0	0	0	0	0	0
1998	14123001481	2014-12-30 09:34:59	3	0	0	0	0	0		0	0	0	0	0	0	0		0	0	0		0				38	1	16010401632
1999	14123001482	2014-12-30 09:34:59	3	0	0	0	0	0		0	0	0	0	0	0	0		0	0	0		0				38	1	16010401633	2016-01-04 10:36:00	3	0	0	0	0	0		0	0	0	0	0	0	0		0	0	0		0
[truncated: 3,881 more rows]
[truncated: 251 more columns]
