# Supplementary material for: Prevalence and type distribution of human papillomavirus in a Chinese urban population between 2014 and 2018: a retrospective study
Source: PeerJ. 2020 Mar 23;8:e8709. doi: 10.7717/peerj.8709 (PMC7098390; doi:10.7717/peerj.8709)
Supplement: Table S4 [file peerj-08-8709-s008.xlsx]

## Sheet: Sheet1
Supplemental Table 4. Codebook
Variable	Code Definition
id
no1
date1
HPVmethod1	1:fluorescence quantitative PCR; 2 PCR reverse dot blot
hpv1	0: Negative; 1: Positive
HPV061	0: Negative; 2: Positive
HPV111	0: Negative; 3: Positive
HPV161	0: Negative; 4: Positive
HPV181	0: Negative; 5: Positive
HPV261	0: Negative; 6: Positive
HPV311	0: Negative; 7: Positive
HPV331	0: Negative; 8: Positive
HPV351	0: Negative; 9: Positive
HPV391	0: Negative; 10: Positive
HPV451	0: Negative; 11: Positive
HPV511	0: Negative; 12: Positive
HPV521	0: Negative; 13: Positive
HPV531	0: Negative; 14: Positive
HPV561	0: Negative; 15: Positive
HPV581	0: Negative; 16: Positive
HPV591	0: Negative; 17: Positive
HPV661	0: Negative; 18: Positive
HPV681	0: Negative; 19: Positive
HPV731	0: Negative; 20: Positive
HPV811	0: Negative; 21: Positive
HPV821	0: Negative; 22: Positive
age1
no2
date2
HPVmethod2	1:fluorescence quantitative PCR; 2 PCR reverse dot blot
hpv2	0: Negative; 1: Positive
HPV062	0: Negative; 2: Positive
HPV112	0: Negative; 3: Positive
HPV162	0: Negative; 4: Positive
HPV182	0: Negative; 5: Positive
HPV262	0: Negative; 6: Positive
HPV312	0: Negative; 7: Positive
HPV332	0: Negative; 8: Positive
HPV352	0: Negative; 9: Positive
HPV392	0: Negative; 10: Positive
HPV452	0: Negative; 11: Positive
HPV512	0: Negative; 12: Positive
HPV522	0: Negative; 13: Positive
HPV532	0: Negative; 14: Positive
HPV562	0: Negative; 15: Positive
HPV582	0: Negative; 16: Positive
HPV592	0: Negative; 17: Positive
HPV662	0: Negative; 18: Positive
HPV682	0: Negative; 19: Positive
HPV732	0: Negative; 20: Positive
HPV812	0: Negative; 21: Positive
HPV822	0: Negative; 22: Positive
age2
no3
date3
HPVmethod3	1:fluorescence quantitative PCR; 2 PCR reverse dot blot
hpv3	0: Negative; 1: Positive
HPV063	0: Negative; 2: Positive
HPV113	0: Negative; 3: Positive
HPV163	0: Negative; 4: Positive
HPV183	0: Negative; 5: Positive
HPV263	0: Negative; 6: Positive
HPV313	0: Negative; 7: Positive
HPV333	0: Negative; 8: Positive
HPV353	0: Negative; 9: Positive
HPV393	0: Negative; 10: Positive
HPV453	0: Negative; 11: Positive
HPV513	0: Negative; 12: Positive
HPV523	0: Negative; 13: Positive
HPV533	0: Negative; 14: Positive
HPV563	0: Negative; 15: Positive
HPV583	0: Negative; 16: Positive
HPV593	0: Negative; 17: Positive
HPV663	0: Negative; 18: Positive
HPV683	0: Negative; 19: Positive
HPV733	0: Negative; 20: Positive
HPV813	0: Negative; 21: Positive
HPV823	0: Negative; 22: Positive
age3
no4
date4
HPVmethod4	1:fluorescence quantitative PCR; 2 PCR reverse dot blot
hpv4	0: Negative; 1: Positive
HPV064	0: Negative; 2: Positive
HPV114	0: Negative; 3: Positive
HPV164	0: Negative; 4: Positive
HPV184	0: Negative; 5: Positive
HPV264	0: Negative; 6: Positive
HPV314	0: Negative; 7: Positive
HPV334	0: Negative; 8: Positive
HPV354	0: Negative; 9: Positive
HPV394	0: Negative; 10: Positive
HPV454	0: Negative; 11: Positive
HPV514	0: Negative; 12: Positive
HPV524	0: Negative; 13: Positive
HPV534	0: Negative; 14: Positive
HPV564	0: Negative; 15: Positive
HPV584	0: Negative; 16: Positive
HPV594	0: Negative; 17: Positive
HPV664	0: Negative; 18: Positive
HPV684	0: Negative; 19: Positive
HPV734	0: Negative; 20: Positive
HPV814	0: Negative; 21: Positive
HPV824	0: Negative; 22: Positive
age4
no5
date5
HPVmethod5	1:fluorescence quantitative PCR; 2 PCR reverse dot blot
hpv5	0: Negative; 1: Positive
HPV065	0: Negative; 2: Positive
HPV115	0: Negative; 3: Positive
HPV165	0: Negative; 4: Positive
HPV185	0: Negative; 5: Positive
HPV265	0: Negative; 6: Positive
HPV315	0: Negative; 7: Positive
HPV335	0: Negative; 8: Positive
HPV355	0: Negative; 9: Positive
HPV395	0: Negative; 10: Positive
HPV455	0: Negative; 11: Positive
HPV515	0: Negative; 12: Positive
HPV525	0: Negative; 13: Positive
HPV535	0: Negative; 14: Positive
HPV565	0: Negative; 15: Positive
HPV585	0: Negative; 16: Positive
HPV595	0: Negative; 17: Positive
HPV665	0: Negative; 18: Positive
HPV685	0: Negative; 19: Positive
HPV735	0: Negative; 20: Positive
HPV815	0: Negative; 21: Positive
HPV825	0: Negative; 22: Positive
age5
no6
date6
HPVmethod6	1:fluorescence quantitative PCR; 2 PCR reverse dot blot
hpv6	0: Negative; 1: Positive
HPV066	0: Negative; 2: Positive
HPV116	0: Negative; 3: Positive
HPV166	0: Negative; 4: Positive
HPV186	0: Negative; 5: Positive
HPV266	0: Negative; 6: Positive
HPV316	0: Negative; 7: Positive
HPV336	0: Negative; 8: Positive
HPV356	0: Negative; 9: Positive
HPV396	0: Negative; 10: Positive
HPV456	0: Negative; 11: Positive
HPV516	0: Negative; 12: Positive
HPV526	0: Negative; 13: Positive
HPV536	0: Negative; 14: Positive
HPV566	0: Negative; 15: Positive
HPV586	0: Negative; 16: Positive
HPV596	0: Negative; 17: Positive
HPV666	0: Negative; 18: Positive
HPV686	0: Negative; 19: Positive
HPV736	0: Negative; 20: Positive
HPV816	0: Negative; 21: Positive
HPV826	0: Negative; 22: Positive
age6
no7
date7
HPVmethod7	1:fluorescence quantitative PCR; 2 PCR reverse dot blot
hpv7	0: Negative; 1: Positive
HPV067	0: Negative; 2: Positive
HPV117	0: Negative; 3: Positive
HPV167	0: Negative; 4: Positive
HPV187	0: Negative; 5: Positive
HPV267	0: Negative; 6: Positive
HPV317	0: Negative; 7: Positive
HPV337	0: Negative; 8: Positive
HPV357	0: Negative; 9: Positive
HPV397	0: Negative; 10: Positive
HPV457	0: Negative; 11: Positive
HPV517	0: Negative; 12: Positive
HPV527	0: Negative; 13: Positive
HPV537	0: Negative; 14: Positive
HPV567	0: Negative; 15: Positive
HPV587	0: Negative; 16: Positive
HPV597	0: Negative; 17: Positive
HPV667	0: Negative; 18: Positive
HPV687	0: Negative; 19: Positive
HPV737	0: Negative; 20: Positive
HPV817	0: Negative; 21: Positive
HPV827	0: Negative; 22: Positive
age7
no8
date8
HPVmethod8	1:fluorescence quantitative PCR; 2 PCR reverse dot blot
hpv8	0: Negative; 1: Positive
HPV068	0: Negative; 2: Positive
HPV118	0: Negative; 3: Positive
HPV168	0: Negative; 4: Positive
HPV188	0: Negative; 5: Positive
HPV268	0: Negative; 6: Positive
HPV318	0: Negative; 7: Positive
HPV338	0: Negative; 8: Positive
HPV358	0: Negative; 9: Positive
HPV398	0: Negative; 10: Positive
HPV458	0: Negative; 11: Positive
HPV518	0: Negative; 12: Positive
HPV528	0: Negative; 13: Positive
HPV538	0: Negative; 14: Positive
HPV568	0: Negative; 15: Positive
HPV588	0: Negative; 16: Positive
HPV598	0: Negative; 17: Positive
HPV668	0: Negative; 18: Positive
HPV688	0: Negative; 19: Positive
HPV738	0: Negative; 20: Positive
HPV818	0: Negative; 21: Positive
HPV828	0: Negative; 22: Positive
age8
no9
date9
HPVmethod9	1:fluorescence quantitative PCR; 2 PCR reverse dot blot
hpv9	0: Negative; 1: Positive
HPV069	0: Negative; 2: Positive
HPV119	0: Negative; 3: Positive
HPV169	0: Negative; 4: Positive
HPV189	0: Negative; 5: Positive
HPV269	0: Negative; 6: Positive
HPV319	0: Negative; 7: Positive
HPV339	0: Negative; 8: Positive
HPV359	0: Negative; 9: Positive
HPV399	0: Negative; 10: Positive
HPV459	0: Negative; 11: Positive
HPV519	0: Negative; 12: Positive
HPV529	0: Negative; 13: Positive
HPV539	0: Negative; 14: Positive
HPV569	0: Negative; 15: Positive
HPV589	0: Negative; 16: Positive
HPV599	0: Negative; 17: Positive
HPV669	0: Negative; 18: Positive
HPV689	0: Negative; 19: Positive
HPV739	0: Negative; 20: Positive
HPV819	0: Negative; 21: Positive
HPV829	0: Negative; 22: Positive
age9
no10
date10
HPVmethod10	1:fluorescence quantitative PCR; 2 PCR reverse dot blot
hpv10	0: Negative; 1: Positive
HPV0610	0: Negative; 2: Positive
HPV1110	0: Negative; 3: Positive
HPV1610	0: Negative; 4: Positive
HPV1810	0: Negative; 5: Positive
HPV2610	0: Negative; 6: Positive
HPV3110	0: Negative; 7: Positive
HPV3310	0: Negative; 8: Positive
HPV3510	0: Negative; 9: Positive
HPV3910	0: Negative; 10: Positive
HPV4510	0: Negative; 11: Positive
HPV5110	0: Negative; 12: Positive
HPV5210	0: Negative; 13: Positive
HPV5310	0: Negative; 14: Positive
HPV5610	0: Negative; 15: Positive
HPV5810	0: Negative; 16: Positive
HPV5910	0: Negative; 17: Positive
HPV6610	0: Negative; 18: Positive
HPV6810	0: Negative; 19: Positive
HPV7310	0: Negative; 20: Positive
HPV8110	0: Negative; 21: Positive
HPV8210	0: Negative; 22: Positive
age10
no11
date11
HPVmethod11	1:fluorescence quantitative PCR; 2 PCR reverse dot blot
hpv11	0: Negative; 1: Positive
HPV0611	0: Negative; 2: Positive
HPV1111	0: Negative; 3: Positive
HPV1611	0: Negative; 4: Positive
HPV1811	0: Negative; 5: Positive
HPV2611	0: Negative; 6: Positive
HPV3111	0: Negative; 7: Positive
HPV3311	0: Negative; 8: Positive
HPV3511	0: Negative; 9: Positive
HPV3911	0: Negative; 10: Positive
HPV4511	0: Negative; 11: Positive
HPV5111	0: Negative; 12: Positive
HPV5211	0: Negative; 13: Positive
HPV5311	0: Negative; 14: Positive
HPV5611	0: Negative; 15: Positive
HPV5811	0: Negative; 16: Positive
HPV5911	0: Negative; 17: Positive
HPV6611	0: Negative; 18: Positive
HPV6811	0: Negative; 19: Positive
HPV7311	0: Negative; 20: Positive
HPV8111	0: Negative; 21: Positive
HPV8211	0: Negative; 22: Positive
age11
sex	1:male;2:female
hpvtime
